# Supplementary material for: Efficient one-pot synthesis of the unexpected fused multicyclic iminosugars by an aza-Diels–Alder mechanism
Source: Royal Society of Chemistry journal article supplement (doi:10.1039/d2qo01284g), 2022-01-01

## Supplementary Information

### Efficient one-pot Synthesis of the Unexpected Fused Multicyclic Iminosugars by Aza-Diels-Alder Mechanism

Jilai Wu,<sup>a</sup> Lulu Su,<sup>a</sup> Tongguan Jia,<sup>a</sup> Xiaoming Xu,<sup>a</sup> Yaxin Cui,<sup>a</sup> Chao Wei,<sup>a</sup> Xiaoliu Li,<sup>a</sup> Hua Chen\*<sup>a</sup>

Key Laboratory of Chemical Biology of Hebei Province, College of Chemistry and Environmental Science, Hebei University, Baoding Hebei, 071002, P. R. China

#### General Considerations:

Solvents were all analytical grade and other reagents were purchased from energy chemical and Bide Pharmatech Ltd. All reactions need to be carried out under nitrogen atmosphere. <sup>1</sup>H NMR spectra were measured on Bruker AVANCE 600 MHz and 400 MHz spectrometers. <sup>13</sup>C NMR spectra were recorded on Bruker 100 MHz spectrometers with complete proton decoupling. Chemical shifts were reported in ppm from tetramethylsilane in the case of MeOH or DMSO as an internal standard. Melting points were measured on glass slides on an SGW X-4 Melting Point Apparatus. Optical rotations were determined on an SGW-1 automatic polarimeter. Mass Spectra (MS) and High Resolution Mass Spectra (HRMS) were carried out on a FTICR-MS (Ionspec 7.0T) mass spectrometer with electrospray ionization (ESI). Thin-layer chromatography (TLC) was performed on precoated plates (Qingdao GF254) with detection by UV light, Puke (china) silica gel (200-300 mesh) was used for column chromatography.

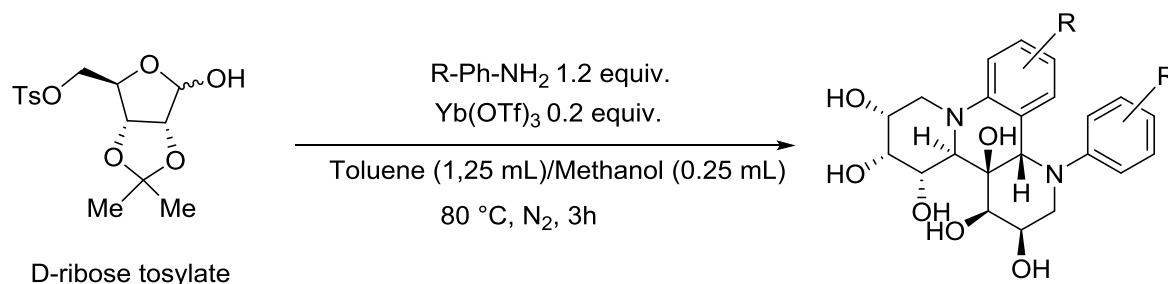

**Fig. 1.** Synthesis of the complex multicyclic iminosugars using D-ribose tosylate

General experimental procedure: D-Ribose tosylate (206 mg, 0.6 mmol), aniline (1.2 equiv.) and Yb(OTf)<sub>3</sub> (0.2 equiv.) were added into a 25 mL flask, 1.50 mL toluene and methanol (V:V=5:1) as the mixed solvent. Then the solution was stirred

at the temperature of 80 °C under N<sub>2</sub> atmosphere for 3h. Upon completion, The mixture was cooled to room temperature, 20 ml of methanol was added to dissolve the solid residue, and the solvent was evaporated in vacuo. The crude product was purified by column chromatography (dichloromethane:methanol V/V = 15:1) to give **5a** as a pale yellow solid accompanied with **5a'**. Compound **5a''** was obtained at room temperature. Control experiments, including gram-level reactions and mechanistic studies, are involved in the reaction system.

Under similar conditions, different aromatic amines were used as raw materials for the reaction, and the corresponding products were obtained respectively.

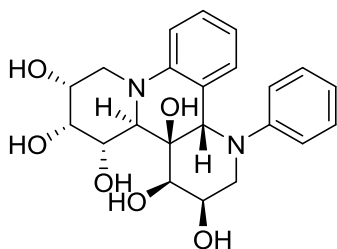

**(3R,4R,4aR,4bR,5S,6R,7R,13bS)-1-phenyl-1,3,4,5,6,7,8,13b-octahydro-2H-benzo[*h*]pyrido[2,1-*f*][1,6]naphthyridine-3,4,4a,5,6,7(4bH)-hexaol (5a)**. White solid, yield 89%, m.p. 92.3 - 93.7 °C,  $[\alpha]_D^{25} +31.0$  (*c* 0.1, CH<sub>3</sub>OH); <sup>1</sup>H NMR (600 MHz, DMSO-*d*<sub>6</sub>), δ<sub>H</sub> (ppm): 7.20 – 7.17 (m, 2H), 7.08 (t, *J* = 7.8 Hz, 1H), 7.05 (d, *J* = 8.4 Hz, 2H), 6.89 – 6.85 (m, 2H), 6.66 (t, *J* = 7.2 Hz, 1H), 6.58 (t, *J* = 7.8 Hz, 1H), 5.93 (s, 1H), 5.27 (d, *J* = 3.0Hz, 1H), 5.23 – 5.17 (m, 2H), 4.91 (d, *J* = 7.8 Hz, 1H), 4.82 (d, *J* = 3.6 Hz, 1H), 4.73 (d, *J* = 6.6 Hz, 1H), 3.91 (d, *J* = 10.8 Hz, 1H), 3.87 – 3.83(m, 2H), 3.81 – 3.79 (m, 1H), 3.75– 3.74 (m, 1H), 3.68 (dd, *J* = 13.2, 4.2 Hz, 1H), 3.29 (dd, *J* = 7.8, 3.0 Hz, 1H), 3.07 (dd, *J* = 13.8, 11.4 Hz, 1H), 2.95 (d, *J* = 13.8 Hz, 1H). <sup>13</sup>C NMR (100 MHz, DMSO-*d*<sub>6</sub>), δ<sub>C</sub> (ppm): 152.2, 144.5, 129.2, 128.5, 126.7, 119.8, 117.1, 116.8, 113.8, 111.8, 73.7, 72.0, 70.2, 68.7, 66.3, 64.9, 60.1, 54.3, 47.1, 46.9. MS (ESI): Calculated for C<sub>22</sub>H<sub>27</sub>N<sub>2</sub>O<sub>6</sub> ([M+H]<sup>+</sup>) : 415.1864, found: 415.1865.

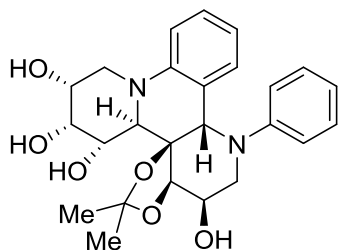

**(3R,3aR,6aS,6bR,7S,8R,9R,14bS)-5,5-dimethyl-1-phenyl-1,3,3a,6b,7,8,9,10,10a,14b-decahydro-2H-dibenzo[*f,h*][1,3]dioxolo[4,5-*d*]quinoline-3,7,8,9-tetraol (5a').**

Yellow solid, yield 5%, m.p. 154.7 - 155.7 °C,  $[\alpha]_D^{25} +31.0$  (*c* 0.1, CH<sub>3</sub>OH); <sup>1</sup>H NMR (400 MHz, CD<sub>3</sub>OD),  $\delta_H$  (ppm): 7.22 - 7.18 (m, 1H), 7.09 - 7.05 (m, 1H), 6.90 - 6.85 (m, 2H), 6.65 (t, *J* = 7.2 Hz, 1H), 6.58 (t, *J* = 7.2 Hz, 1H), 5.22 (s, 1H), 4.41 (d, *J* = 2.4 Hz, 1H), 4.02 (d, *J* = 2.4 Hz, 1H), 3.84 - 3.78 (m, 2H), 3.68 (d, *J* = 10.4 Hz, 1H), 3.66 - 3.59 (m, 2H), 3.26 - 3.19 (m, 2H), 3.05 (dd, *J* = 10.0, 7.2 Hz, 1H), 1.48 (s, 3H), 1.20 (s, 3H). <sup>13</sup>C NMR (100 MHz, CD<sub>3</sub>OD),  $\delta_C$  (ppm): 149.7, 143.1, 129.1, 128.7, 127.3, 122.4, 118.5, 116.4, 112.3, 111.3, 111.2, 82.3, 80.5, 72.0, 68.6, 64.9, 64.3, 62.0, 53.8, 44.8, 26.0, 25.9. MS (ESI): Calculated for C<sub>25</sub>H<sub>31</sub>N<sub>2</sub>O<sub>6</sub> ([M+H]<sup>+</sup>): 455.2177, found: 455.2177.

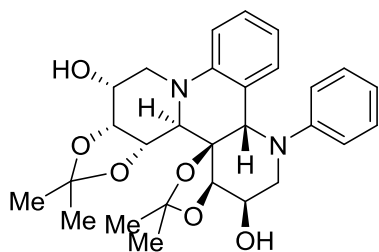

**(2R,2aR,5aS,5bR,5cR,8aR,9R,11aS)-4,4,7,7-tetramethyl-11-phenyl-2,2a,5a,5b,8a,9,11,11a-octahydro-1H,10H-[1,3]dioxolo[4',5':3,4]pyrido[2,1-*f*]benzo[*h*][1,3]dioxolo[4,5-*d*][1,6]naphthyridine-2,9-diol (5a'').** Yellow solid, yield 85%, m.p. 179.7 - 180.7 °C,  $[\alpha]_D^{25} +111.0$  (*c* 0.1, CH<sub>3</sub>OH); <sup>1</sup>H NMR (400 MHz, CD<sub>3</sub>OD),  $\delta_H$  (ppm): 7.23 (t, *J* = 7.9 Hz, 2H), 7.09 (d, *J* = 8.1 Hz, 1H), 6.95 - 6.85 (m, 4H), 6.65 (d, *J* = 28.1 Hz, 2H), 5.26 (s, 1H), 4.55 - 4.46 (m, 3H), 4.38 (s, 1H), 4.05 (d, *J* = 11.1 Hz, 1H), 3.98 - 3.91 (m, 1H), 3.66 (s, 1H), 3.48 (d, *J* = 9.1 Hz, 1H), 3.27 (s, 1H), 3.09 (s, 1H), 1.62 (s, 3H), 1.47 (s, 3H), 1.41 (s, 3H), 1.29 (s, 3H). <sup>13</sup>C NMR (100 MHz, CD<sub>3</sub>OD),  $\delta_C$  (ppm): 149.9, 142.6, 129.0, 128.6, 127.2, 118.3, 116.2, 112.2, 111.3,

110.9, 109.8, 82.3, 79.7, 76.4, 73.7, 66.6, 65.1, 62.9, 62.1, 53.8, 45.0, 29.4, 27.8, 24.9.

MS (ESI): Calculated for  $C_{28}H_{35}N_2O_6$  ( $[M+H]^+$ ): 495.2490, found: 495.2490.

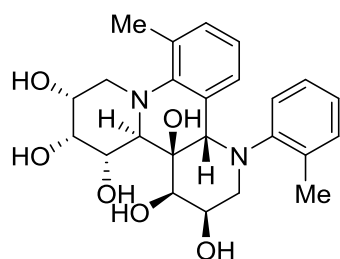

**(3R,4R,4aR,4bR,5S,6R,7R,13bS)-10-methyl-1-(*o*-tolyl)-1,3,4,5,6,7,8,13b-octahydro-2H-benzo[*h*]pyrido[2,1-*f*][1,6]naphthyridine-3,4,4a,5,6,7(4bH)-hexaol (5b).**

Yellow solid, yield 34%, m.p. 114.7 - 115.3 °C,  $[\alpha]_D^{25} +45.0$  (*c* 0.1,  $CH_3OH$ );  $^1H$  NMR (400 MHz,  $CD_3OD$ ),  $\delta_H$  (ppm): 7.51 (d,  $J = 8.0$  Hz, 1H), 7.17 – 7.13 (m, 1H), 6.94 – 6.87 (m, 2H), 6.79 (dd,  $J = 7.2, 2.0$  Hz, 1H), 6.23 – 6.19 (m, 2H), 4.97 (s, 1H), 4.27 (d,  $J = 8.4$  Hz, 1H), 4.15 (d,  $J = 3.2$  Hz, 1H), 4.05 (d,  $J = 9.2$  Hz, 2H), 4.00 – 3.98 (m, 1H), 3.96 – 3.93 (m, 1H), 3.48 (dd,  $J = 12.4, 4.4$  Hz, 1H), 3.37 (d,  $J = 10.5$  Hz, 1H), 3.21 – 3.15 (m, 1H), 2.81 (dd,  $J = 10.8, 5.2$  Hz, 1H), 2.23 (s, 3H), 1.93 (s, 3H).  $^{13}C$  NMR (100 MHz,  $CD_3OD$ ),  $\delta_C$  (ppm): 145.5, 131.4, 129.8, 125.6, 125.0, 117.6, 74.4, 72.9, 71.2, 69.3, 68.4, 63.1, 57.3, 52.4, 19.6, 17.6. MS (ESI): Calculated for  $C_{24}H_{31}N_2O_6$  ( $[M+H]^+$ ): 443.2104, found: 442.2103.

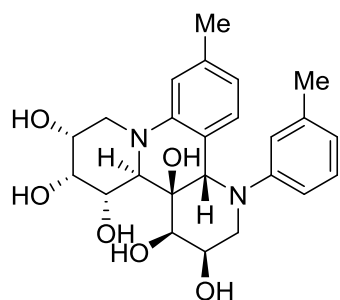

**(3R,4R,4aR,4bR,5S,6R,7R,13bS)-11-methyl-1-(*m*-tolyl)-1,3,4,5,6,7,8,13b-octahydro-2H-benzo[*h*]pyrido[2,1-*f*][1,6]naphthyridine-3,4,4a,5,6,7(4bH)-hexaol (5c).**

Yellow solid, yield 50%, m.p. 140.2 - 142.4 °C,  $[\alpha]_D^{25} +157.0$  (*c* 0.1,  $CH_3OH$ );  $^1H$  NMR (400 MHz,  $CD_3OD$ ),  $\delta_H$  (ppm): 7.02 (t,  $J = 8.0$  Hz, 1H), 6.87 – 6.81 (m, 3H), 6.68 (s, 1H), 6.48 (d,  $J = 7.6$  Hz, 1H), 6.39 (d,  $J = 8.0$  Hz, 1H), 5.24 (s, 1H), 3.99 (d,  $J = 10.8$  Hz, 2H), 3.88 – 3.77 (m, 4H), 3.56 – 3.53 (m, 1H), 3.49 (d,  $J = 3.6$  Hz, 1H), 3.27 – 3.18 (m, 1H), 3.03 (d,  $J = 14.0$  Hz, 1H), 2.22 (s, 3H), 2.17 (s, 3H).  $^{13}C$  NMR

(100 MHz, CD<sub>3</sub>OD),  $\delta_C$  (ppm): 153.8, 145.6, 140.0, 139.8, 130.2, 128.7, 120.0, 119.6, 118.5, 116.2, 113.8, 112.8, 75.1, 73.7, 72.2, 70.0, 68.5, 66.3, 61.9, 56.0, 47.7, 22.0, 21.6. MS (ESI): Calculated for C<sub>24</sub>H<sub>30</sub>N<sub>2</sub>NaO<sub>6</sub> ([M+Na]<sup>+</sup>): 465.1994, found: 465.1993.

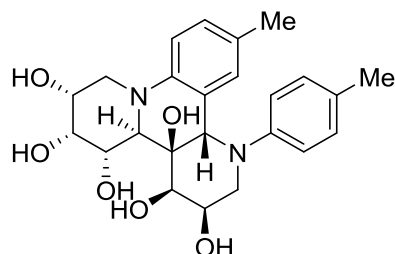

**(3R,4R,4aR,4bR,5S,6R,7R,13bS)-12-methyl-1-(p-tolyl)-1,3,4,5,6,7,8,13b-octahydro-2H-benzo[*h*]pyrido[2,1-*f*][1,6]naphthyridine-3,4,4a,5,6,7(4bH)-hexaol (5d).**

Yellow solid, yield 61%, m.p. 105.5 - 107.5 °C,  $[\alpha]_D^{25} +35.0$  (*c* 0.1, CH<sub>3</sub>OH); <sup>1</sup>H NMR (400 MHz, CD<sub>3</sub>OD),  $\delta_H$  (ppm): 7.05 – 6.98 (m, 4H), 6.93 (dd, *J* = 8.4, 2.0 Hz, 1H), 6.87 (s, 1H), 6.80 (d, *J* = 8.4 Hz, 1H), 5.26 (s, 1H), 4.04 – 3.99 (m, 2H), 3.92 – 3.84 (m, 3H), 3.78 (dd, *J* = 14.0, 4.4 Hz, 1H), 3.60 – 3.55 (m, 1H), 3.54 (d, *J* = 3.2 Hz, 1H), 3.28 – 3.22 (m, 1H), 3.11 (d, *J* = 13.6 Hz, 1H), 2.25 (s, 3H), 2.09 (s, 3H). <sup>13</sup>C NMR (100 MHz, CD<sub>3</sub>OD),  $\delta_C$  (ppm): 150.4, 142.1, 129.5, 129.2, 127.6, 126.9, 126.5, 120.2, 114.3, 112.0, 74.0, 72.4, 71.0, 68.6, 67.3, 64.9, 63.0, 60.9, 54.7, 19.2, 19.1. MS (ESI): Calculated for C<sub>24</sub>H<sub>30</sub>N<sub>2</sub>KO<sub>6</sub> ([M+K]<sup>+</sup>): 481.2104, found: 481.2105.

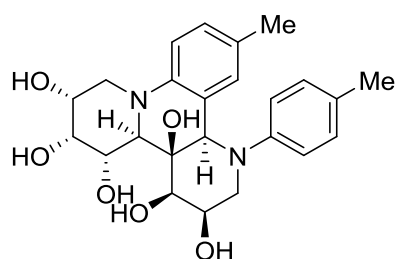

**(3R,4R,4aR,4bR,5S,6R,7R,13bR)-12-methyl-1-(p-tolyl)-1,3,4,5,6,7,8,13b-octahydro-2H-benzo[*h*]pyrido[2,1-*f*][1,6]naphthyridine-3,4,4a,5,6,7(4bH)-hexaol (5d-1).**

Yellow solid, yield 20% m.p. 119.2 - 120.4 °C,  $[\alpha]_D^{25} +49.0$  (*c* 0.1, CH<sub>3</sub>OH); <sup>1</sup>H NMR (400 MHz, CD<sub>3</sub>OD),  $\delta_H$  (ppm): 7.14 (d, *J* = 2.0 Hz, 1H), 7.06 – 7.04 (m, 1H), 6.83 (dd, *J* = 8.4, 4.4 Hz, 3H), 6.26 – 6.24 (m, 2H), 4.89 (s, 1H), 4.13– 4.10 (m, 2H), 3.96 (d, *J* = 2.8 Hz, 1H), 3.73 (dd, *J* = 10.4, 2.8 Hz, 2H), 3.61 – 3.57 (m, 1H), 3.50 (d,

$J = 10.4$  Hz, 1H), 3.21 – 3.15 (m, 2H), 3.07 – 3.03 (m, 1H), 2.24 (s, 3H), 2.15 (s, 3H).  $^{13}\text{C}$  NMR (100 MHz,  $\text{CD}_3\text{OD}$ ),  $\delta_{\text{C}}$  (ppm): 147.6, 141.4, 131.9, 131.3, 131.2, 130.4, 129.0, 127.5, 124.3, 114.4, 113.7, 81.2, 81.1, 79.6, 74.3, 70.4, 66.2, 56.5, 48.1, 46.7, 20.5, 20.3. MS (ESI): Calculated for  $\text{C}_{24}\text{H}_{31}\text{N}_2\text{O}_6$  ( $[\text{M}+\text{H}]^+$ ): 443.2104, found: 443.2105.

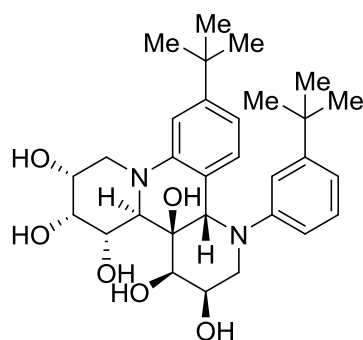

**(3R,4R,4aR,4bR,5S,6R,7R,13bS)-11-(tert-butyl)-1-(3-(tert-butyl)phenyl)-1,3,4,5,6,7,8,13b-octahydro-2H-benzo[h]pyrido[2,1-f][1,6]naphthyridine-3,4,4a,5,6,7(4bH)-hexaol (5e).** Yellow solid, yield 52%, m.p. 168.3 - 169.5 °C,  $[\alpha]_{\text{D}}^{25} +87.0$  ( $c$  0.1,  $\text{CH}_3\text{OH}$ );  $^1\text{H}$  NMR (400 MHz,  $\text{CD}_3\text{OD}$ ),  $\delta_{\text{H}}$  (ppm): 7.15 – 7.09 (m, 2H), 6.97 (d,  $J = 8.4$  Hz, 1H), 6.92 – 6.88 (m, 2H), 6.79 – 6.77 (m, 1H), 6.68 (dd,  $J = 8.4, 2.0$  Hz, 1H), 5.29 (s, 1H), 4.06 – 4.04 (m, 2H), 3.94 – 3.84 (m, 4H), 3.63–3.59 (m, 1H), 3.56 (d,  $J = 3.2$  Hz, 1H), 3.30 – 3.26 (m, 1H), 3.14 (d,  $J = 14.0$  Hz, 1H), 1.31 (s, 9H), 1.27 (s, 9H).  $^{13}\text{C}$  NMR (100 MHz,  $\text{CD}_3\text{OD}$ ),  $\delta_{\text{C}}$  (ppm): 153.7, 153.3, 153.2, 145.4, 129.9, 128.5, 118.8, 116.4, 116.1, 113.2, 110.2, 75.2, 73.7, 72.3, 70.1, 68.6, 66.3, 62.2, 56.2, 47.8, 35.6, 35.6, 31.9, 31. MS (ESI): Calculated for  $\text{C}_{30}\text{H}_{43}\text{N}_2\text{O}_6$  ( $[\text{M}+\text{H}]^+$ ): 527.3043, found: 527.3043.

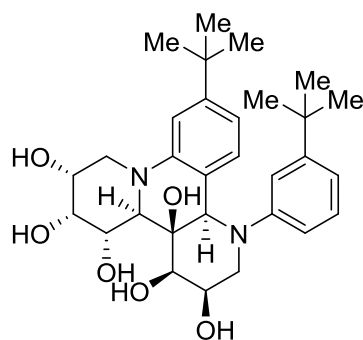

**(3R,4R,4aR,4bR,5S,6R,7R,13bR)-11-(tert-butyl)-1-(3-(tert-butyl)phenyl)-1,3,4,5,6,7,8,13b-octahydro-2H-benzo[h]pyrido[2,1-f][1,6]naphthyridine-3,4,4a,5,6,7(4bH)-hexaol**

**-hexaol (5e-1).** Yellow solid, yield 21%, m.p. 140.3 - 141.5 °C,  $[\alpha]_D^{25} +30.0$  (*c* 0.1, CH<sub>3</sub>OH); <sup>1</sup>H NMR (400 MHz, CD<sub>3</sub>OD),  $\delta_H$  (ppm): 7.27 (d, *J* = 8.0 Hz, 1H), 6.94 – 6.90 (m, 3H), 6.64 – 6.62 (m, 1H), 6.46 (t, *J* = 2.0 Hz, 1H), 6.08 (dd, *J* = 8.0, 2.0 Hz, 1H), 4.93 (s, 1H), 4.15 – 4.14 (m, 2H), 3.99 (t, *J* = 2.8 Hz, 1H), 3.83 (dd, *J* = 13.6, 4.4 Hz, 1H), 3.74 (dd, *J* = 10.4, 2.8 Hz, 1H), 3.64 – 3.56 (m, 2H), 3.27 – 3.19 (m, 2H), 3.11 (dd, *J* = 13.2, 4.0 Hz, 1H), 1.33 (s, 9H), 1.23 (s, 9H). <sup>13</sup>C NMR (100 MHz, CD<sub>3</sub>OD),  $\delta_C$  (ppm): 153.8, 153.0, 149.7, 143.1, 130.8, 129.5, 121.6, 117.1, 115.5, 111.9, 111.3, 110.5, 81.1, 80.8, 79.5, 74.2, 73.6, 70.5, 66.1, 56.6, 48.0, 46.3, 35.7, 35.4, 31.9, 31.8, 31.8. MS (ESI): Calculated for r C<sub>30</sub>H<sub>42</sub>N<sub>2</sub>KO<sub>6</sub> ([M+K]<sup>+</sup>): 565.4043, found: 565.4044.

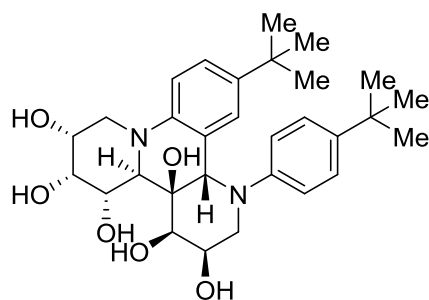

**(3R,4R,4aR,4bR,5S,6R,7R,13bS)-12-(tert-butyl)-1-(4-(tert-butyl)phenyl)-1,3,4,5,6,7,8,13b-octahydro-2H-benzo[*h*]pyrido[2,1-*f*][1,6]naphthyridine-3,4,4a,5,6,7(4bH)-hexaol (5f).** Yellow solid, yield 50% m.p. 142.3 - 144.5 °C,  $[\alpha]_D^{25} +105.0$  (*c* 0.1, CH<sub>3</sub>OH); <sup>1</sup>H NMR (400 MHz, CD<sub>3</sub>OD),  $\delta_H$  (ppm): 7.30 – 7.27 (m, 2H), 7.14 – 7.11 (m, 2H), 7.07 – 7.04 (m, 2H), 6.81 (d, *J* = 8.4 Hz, 1H), 5.32 (s, 1H), 4.05 – 4.02 (m, 2H), 3.91 (dd, *J* = 10.4, 2.8 Hz, 1H), 3.88 – 3.83 (m, 2H), 3.80 (dd, *J* = 14.0, 4.4 Hz, 1H), 3.60 – 3.55 (m, 2H), 3.25 (dd, *J* = 14.0, 11.6 Hz, 1H), 3.11 – 3.08 (m, 1H), 1.30 (s, 9H), 1.09 (s, 9H). <sup>13</sup>C NMR (100 MHz, CD<sub>3</sub>OD),  $\delta_C$  (ppm): 151.7, 143.3, 141.8, 141.8, 127.1, 126.6, 125.6, 120.9, 115.7, 113.0, 75.2, 73.8, 72.2, 69.9, 68.5, 66.3, 64.3, 62.6, 56.0, 47.8, 34.7, 34.6, 32.0. MS (ESI): Calculated for C<sub>30</sub>H<sub>42</sub>N<sub>2</sub>NaO<sub>6</sub> ([M+Na]<sup>+</sup>): 549.2933, found: 549.2932.

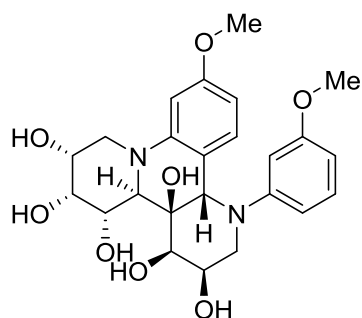

**(3R,4R,4aR,4bR,5S,6R,7R,13bS)-11-methoxy-1-(3-methoxyphenyl)-1,3,4,5,6,7,8,13b-octahydro-2H-benzo[h]pyrido[2,1-f][1,6]naphthyridine-3,4,4a,5,6,7(4bH)-hexaol (5g).** Yellow solid, yield 57%, m.p. 164.6 - 164.5 °C,  $[\alpha]_D^{25} +65.0$  (c 0.1, CH<sub>3</sub>OH); <sup>1</sup>H NMR (400 MHz, CD<sub>3</sub>OD),  $\delta_H$  (ppm): 7.11 (t,  $J = 8.0$  Hz, 1H), 6.92 (d,  $J = 8.4$  Hz, 1H), 6.68 (dd,  $J = 8.4, 2.4$  Hz, 1H), 6.62 (t,  $J = 2.4$  Hz, 1H), 6.43 (d,  $J = 2.4$  Hz, 1H), 6.32 (dd,  $J = 8.4, 2.4$  Hz, 1H), 6.24 (dd,  $J = 8.4, 2.4$  Hz, 1H), 5.25 (s, 1H), 4.03 (d,  $J = 10.8$  Hz, 2H), 3.93 – 3.90 (m, 1H), 3.86 – 3.84 (m, 2H), 3.78 (d,  $J = 4.4$  Hz, 1H), 3.76 (s, 3H), 3.73 (s, 3H), 3.61 – 3.59 (m, 1H), 3.54 (d,  $J = 3.2$  Hz, 1H), 3.30 – 3.24 (m, 1H), 3.10 (d,  $J = 13.6$  Hz, 1H). <sup>13</sup>C NMR (100 MHz, CD<sub>3</sub>OD),  $\delta_C$  (ppm): 162.4, 162.1, 155.2, 146.9, 131.1, 129.7, 113.7, 108.5, 104.4, 103.7, 102.0, 99.4, 75.1, 73.7, 72.2, 70.1, 68.4, 66.3, 61.9, 55.0, 55.6. MS (ESI): Calculated for C<sub>24</sub>H<sub>30</sub>N<sub>2</sub>KO<sub>8</sub> ([M+K]<sup>+</sup>): 513.2001, found: 513.2001.

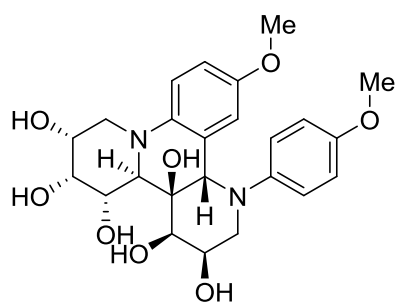

**(3R,4R,4aR,4bR,5S,6R,7R,13bS)-12-methoxy-1-(4-methoxyphenyl)-1,3,4,5,6,7,8,13b-octahydro-2H-benzo[h]pyrido[2,1-f][1,6]naphthyridine-3,4,4a,5,6,7(4bH)-hexaol (5h).** Yellow solid, yield 64%, m.p. 142.7 - 144.5 °C,  $[\alpha]_D^{25} +70.0$  (c 0.1, CH<sub>3</sub>OH); <sup>1</sup>H NMR (400 MHz, CD<sub>3</sub>OD),  $\delta_H$  (ppm): 7.09 – 7.04 (m, 2H), 6.86 – 6.82 (m, 3H), 6.74 – 6.70 (m, 2H), 5.20 (s, 1H), 4.03 (d,  $J = 2.8$  Hz, 1H), 3.98 (d,  $J = 10.8$  Hz, 1H), 3.89 (dd,  $J = 10.8, 2.8$  Hz, 1H), 3.84 – 3.83 (m, 1H), 3.80 – 3.75 (m, 1H), 3.74 (s, 3H), 3.73 – 3.71 (m, 1H), 3.60 – 3.57 (m, 1H), 3.56 (s, 3H), 3.54 (d,  $J = 3.2$  Hz, 1H), 3.25



(dd,  $J = 14.0, 11.2$  Hz, 1H), 3.15 (dd,  $J = 14.0, 1.6$  Hz, 1H).  $^{13}\text{C}$  NMR (100 MHz,  $\text{CD}_3\text{OD}$ ),  $\delta_{\text{C}}$  (ppm): 153.8, 153.7, 148.2, 139.7, 123.1, 117.5, 115.9, 114.4, 113.8, 75.5, 73.8, 72.3, 69.8, 68.6, 66.2, 63.2, 56.2, 56.0, 48.1. MS (ESI): Calculated for  $\text{C}_{24}\text{H}_{30}\text{N}_2\text{KO}_8$  ( $[\text{M}+\text{K}]^+$ ): 513.3001, found: 513.3002.

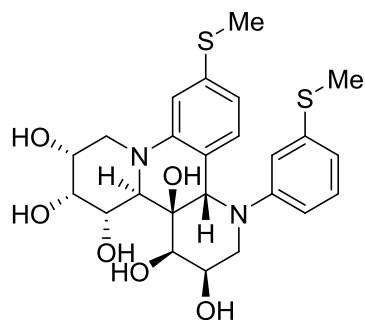

**(3*R*,4*R*,4*aR*,4*bR*,5*S*,6*R*,7*R*,13*bS*)-11-(methylthio)-1-(3-(methylthio)phenyl)-1,3,4,5,6,7,8,13*b*-octahydro-2*H*-benzo[*h*]pyrido[2,1-*f*][1,6]naphthyridine-3,4,4*a*,5,6,7(4*bH*)-hexaol (5i).** Yellow solid, yield 37%, m.p. 159.4 - 160.8 °C,  $[\alpha]_{\text{D}}^{25} +65.0$  ( $c$  0.1,  $\text{CH}_3\text{OH}$ );  $^1\text{H}$  NMR (400 MHz,  $\text{CD}_3\text{OD}$ ),  $\delta_{\text{H}}$  (ppm): 7.13 (t,  $J = 8.0$  Hz, 1H), 6.98 (t,  $J = 2.4$  Hz, 1H), 6.94 (d,  $J = 8.0$  Hz, 1H), 6.87 (dd,  $J = 8.4, 2.4$  Hz, 1H), 6.78 (d,  $J = 1.6$  Hz, 1H), 6.63 (dd,  $J = 7.6, 1.6$  Hz, 1H), 6.55 (dd,  $J = 8.0, 1.6$  Hz, 1H), 5.26 (s, 1H), 4.06 – 4.04 (m, 2H), 3.94 – 3.85 (m, 3H), 3.80 (dd,  $J = 14.0, 4.4$  Hz, 1H), 3.60 – 3.56 (m, 1H), 3.53 (d,  $J = 3.2$  Hz, 1H), 3.30 – 3.24 (m, 1H), 3.10 (d,  $J = 14.0$  Hz, 1H), 2.44 (s, 3H), 2.42 (s, 3H).  $^{13}\text{C}$  NMR (101 MHz, MeOD),  $\delta_{\text{C}}$  (ppm): 154.2, 146.1, 141.0, 140.9, 130.8, 129.1, 118.3, 117.1, 116.8, 113.6, 112.7, 111.0, 75.1, 73.7, 72.2, 70.1, 68.4, 66.3, 62.0, 56.0, 47.9, 15.7, 15.6. MS (ESI): Calculated for  $\text{C}_{24}\text{H}_{31}\text{N}_2\text{O}_6\text{S}_2$  ( $[\text{M}+\text{H}]^+$ ): 507.1545, found: 507.1544.

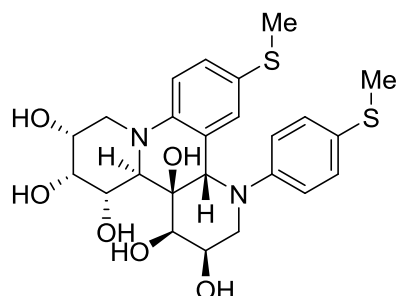

**(3*R*,4*R*,4*aR*,4*bR*,5*S*,6*R*,7*R*,13*bS*)-12-(methylthio)-1-(4-(methylthio)phenyl)-1,3,4,5,6,7,8,13*b*-octahydro-2*H*-benzo[*h*]pyrido[2,1-*f*][1,6]naphthyridine-3,4,4*a*,5,6,7(4*bH*)-hexaol (5j).** Yellow solid, yield 48%, m.p. 158.4 - 160.1 °C,  $[\alpha]_{\text{D}}^{25} +157.0$  ( $c$  0.1,

CH<sub>3</sub>OH); <sup>1</sup>H NMR (400 MHz, CD<sub>3</sub>OD), δ<sub>H</sub> (ppm): 7.24 (d, *J* = 8.4 Hz, 2H), 7.12 – 7.07 (m, 3H), 7.00 (d, *J* = 2.4 Hz, 1H), 6.87 (d, *J* = 8.8 Hz, 1H), 5.29 (s, 1H), 4.05 (d, *J* = 10.4 Hz, 2H), 3.94 – 3.85 (m, 3H), 3.79 (dd, *J* = 14.0, 4.8 Hz, 1H), 3.60 – 3.55 (m, 1H), 3.51 (d, *J* = 3.2 Hz, 1H), 3.30 – 3.23 (m, 1H), 3.10 (d, *J* = 14.0 Hz, 1H), 2.39 (s, 3H), 2.22 (s, 3H). <sup>13</sup>C NMR (100 MHz, CD<sub>3</sub>OD), δ<sub>C</sub> (ppm): 152.5, 144.3, 132.1, 131.2, 129.2, 127.2, 126.6, 122.2, 116.4, 114.1, 75.1, 73.7, 72.2, 70.0, 68.4, 66.3, 62.3, 56.0, 47.9, 18.6, 18.1. HRMS (ESI, *m/z*): Calculated for r C<sub>30</sub>H<sub>42</sub>N<sub>2</sub>KO<sub>6</sub> ([M+K]<sup>+</sup>): 565.4043, found: 565.4042.

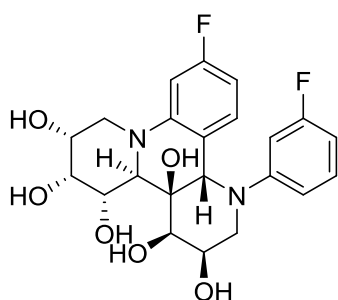

**(3R,4R,4aR,4bR,5S,6R,7R,13bS)-11-fluoro-1-(3-fluorophenyl)-1,3,4,5,6,7,8,13b-octahydro-2H-benzo[*h*]pyrido[2,1-*f*][1,6]naphthyridine-3,4,4a,5,6,7(4bH)-hexaol**

**(5k)**. Yellow solid, yield 50%, m.p. 160.4 - 162.1 °C, [α]<sub>D</sub><sup>25</sup> +120.0 (*c* 0.1, CH<sub>3</sub>OH); <sup>1</sup>H NMR (400 MHz, CD<sub>3</sub>OD), δ<sub>H</sub> (ppm): 7.19 (q, *J* = 8.0 Hz, 1H), 6.99 – 6.94 (m, 1H), 6.88 (dd, *J* = 8.4, 2.4 Hz, 1H), 6.85 – 6.80 (m, 1H), 6.66 (dd, *J* = 12.4, 2.4 Hz, 1H), 6.45 – 6.35 (m, 2H), 5.27 (s, 1H), 4.06 (d, *J* = 10.8 Hz, 2H), 3.96 – 3.87 (m, 3H), 3.75 – 3.70 (m, 1H), 3.60 – 3.57 (m, 1H), 3.51 (d, *J* = 3.2 Hz, 1H), 3.28 (d, *J* = 11.2 Hz, 1H), 3.10 (d, *J* = 14.0 Hz, 1H). <sup>13</sup>C NMR (100 MHz, CD<sub>3</sub>OD), δ<sub>C</sub> (ppm): 166.4, 164.4, 155.7, 147.7, 131.7, 131.6, 130.1, 116.7, 111.0, 105.3(3C), 104.8, 102.4, 102.1, 100.3(2C), 75.0, 73.7, 72.1, 70.1, 68.3, 66.3, 62.0, 55.9, 48.2. MS (ESI): Calculated for C<sub>22</sub>H<sub>24</sub>F<sub>2</sub>N<sub>2</sub>NaO<sub>6</sub> ([M+Na]<sup>+</sup>): 473.1602, found: 473.1603.

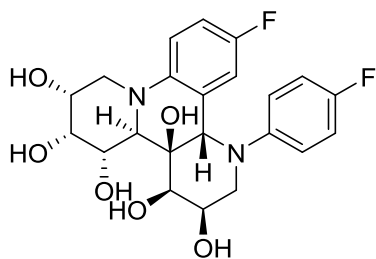

**(3R,4R,4aR,4bR,5S,6R,7R,13bS)-12-fluoro-1-(4-fluorophenyl)-1,3,4,5,6,7,8,13b-octahydro-2H-benzo[*h*]pyrido[2,1-*f*][1,6]naphthyridine-3,4,4a,5,6,7(4bH)-hexaol**

**tahydro-2*H*-benzo[*h*]pyrido[2,1-*f*][1,6]naphthyridine-3,4,4a,5,6,7(4*bH*)-hexaol**

(5l). Yellow solid, yield 74%, m.p. 162.8 - 163.7 °C,  $[\alpha]_D^{25} +99.0$  (c 0.1, CH<sub>3</sub>OH); <sup>1</sup>H NMR (400 MHz, CD<sub>3</sub>OD),  $\delta_H$  (ppm): 7.09 (dd, *J* = 9.2, 4.4 Hz, 2H), 6.97 (t, *J* = 8.4 Hz, 2H), 6.88 (dd, *J* = 6.4, 1.6 Hz, 2H), 6.77 – 6.75 (m, 1H), 5.23 (s, 1H), 4.05 – 4.01 (m, 2H), 3.92 – 3.84 (m, 3H), 3.75 (dd, *J* = 13.6, 4.4 Hz, 1H), 3.59 – 3.55 (m, 1H), 3.51 (d, *J* = 3.2 Hz, 1H), 3.30 – 3.25 (m, 1H), 3.13 (dd, *J* = 14.8, 2.0 Hz, 1H). <sup>13</sup>C NMR (100 MHz, CD<sub>3</sub>OD),  $\delta_C$  (ppm): 158.6, 156.2, 150.3, 142.3, 123.5, 123.4, 117.2, 117.2, 116.7, 116.5, 116.4(2C), 114.7(3C), 75.3, 73.7, 72.2, 69.8, 68.4, 66.2, 62.9, 56.1, 48.12. MS (ESI): Calculated for C<sub>22</sub>H<sub>24</sub>F<sub>2</sub>N<sub>2</sub>NaO<sub>6</sub> ([M+Na]<sup>+</sup>): 473.1602, found: 473.1602.

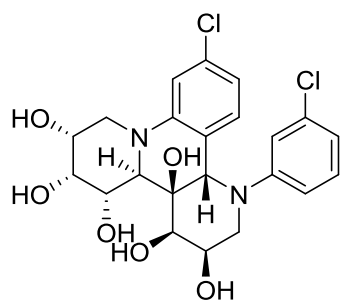

**(7*R*,8*R*,9*S*,9*aR*,9*bR*,10*R*,11*R*,13*aS*)-3-chloro-13-(3-chlorophenyl)-7,8,9,9*a*,11,12,13,13*a*-octahydro-6*H*-pyrido[1,2-*f*]phenanthridine-7,8,9,9*b*,10,11(10*H*)-hexaol (5n).**

Yellow solid, yield 87%, m.p. 126.1 - 128.0 °C,  $[\alpha]_D^{25} +90.0$  (c 0.1, CH<sub>3</sub>OH); <sup>1</sup>H NMR (400 MHz, CD<sub>3</sub>OD),  $\delta_H$  (ppm): 7.17 (t, *J* = 8.0 Hz, 1H), 7.10 (t, *J* = 2.4 Hz, 1H), 7.01 (dd, *J* = 8.4, 2.4 Hz, 1H), 6.94 (dd, *J* = 8.4, 1.2 Hz, 1H), 6.91 (d, *J* = 1.6 Hz, 1H), 6.70 (dd, *J* = 7.6, 2.0 Hz, 1H), 6.65 (dd, *J* = 8.0, 1.6 Hz, 1H), 5.26 (s, 1H), 4.09 – 4.05 (m, 2H), 3.96 – 3.88 (m, 3H), 3.76 (dd, *J* = 14.0, 4.4 Hz, 1H), 3.57 (dd, *J* = 4.4, 2.8 Hz, 1H), 3.50 (d, *J* = 2.8 Hz, 1H), 3.28 (d, *J* = 11.6 Hz, 1H), 3.10 (d, *J* = 13.6 Hz, 1H). <sup>13</sup>C NMR (100 MHz, CD<sub>3</sub>OD),  $\delta_C$  (ppm): 155.0, 147.2, 136.3, 136.0, 131.5, 129.8, 119.7, 118.9, 118.6, 115.4, 113.8, 113.1, 75.0, 73.6, 72.1, 70.1, 68.3, 66.3, 62.1, 56.0, 48.0. MS (ESI): Calculated for C<sub>22</sub>H<sub>25</sub>Cl<sub>2</sub>N<sub>2</sub>O<sub>6</sub> ([M+H]<sup>+</sup>): 483.1011, found: 483.1011.

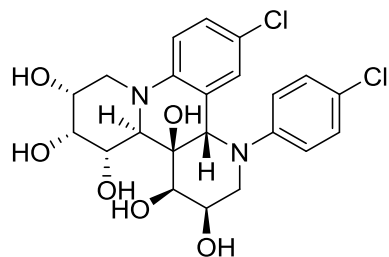

**(3R,4R,4aR,4bR,5S,6R,7R,13bS)-12-chloro-1-(4-chlorophenyl)-1,3,4,5,6,7,8,13b-octahydro-2H-benzo[h]pyrido[2,1-f][1,6]naphthyridine-3,4,4a,5,6,7(4bH)-hexaol (5o).** Yellow solid, yield 87%, m.p. 126.1 - 128.0 °C,  $[\alpha]_D^{25} +90.0$  (c 0.1, CH<sub>3</sub>OH); <sup>1</sup>H NMR (400 MHz, CD<sub>3</sub>OD),  $\delta_H$  (ppm): 7.19 – 7.17 (m, 2H), 7.10 – 7.07 (m, 3H), 6.95 (dd,  $J = 2.8, 1.2$  Hz, 1H), 6.88 (d,  $J = 8.8$  Hz, 1H), 5.27 (s, 1H), 4.07 – 4.03(m, 2H), 3.93 (d,  $J = 2.8$  Hz, 1H), 3.91 – 3.87 (m, 2H), 3.77 (dd,  $J = 14.0, 4.4$  Hz, 1H), 3.58 – 3.54(m, 1H), 3.49 (d,  $J = 3.2$  Hz, 1H), 3.31 – 3.28 (m, 1H), 3.10 (dd,  $J = 14.4, 1.2$  Hz, 1H). <sup>13</sup>C NMR (100 MHz, CD<sub>3</sub>OD),  $\delta_C$  (ppm): 152.4, 144.7, 130.1, 129.9, 128.0, 123.9, 123.5, 123.1, 117.0, 114.8, 75.1, 73.6, 72.2, 70.0, 68.3, 66.3, 62.3, 56.0, 48.4, 48.0. MS (ESI): Calculated for C<sub>22</sub>H<sub>25</sub>Cl<sub>2</sub>N<sub>2</sub>O<sub>6</sub> ([M+H]<sup>+</sup>): 483.1011, found: 483.1013.

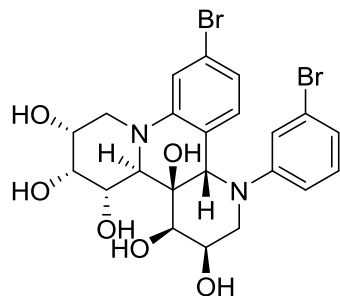

**(3R,4R,4aR,4bR,5S,6R,7R,13bS)-11-bromo-1-(3-bromophenyl)-1,3,4,5,6,7,8,13b-octahydro-2H-benzo[h]pyrido[2,1-f][1,6]naphthyridine-3,4,4a,5,6,7(4bH)-hexaol (5p).** Yellow solid, yield 78%, m.p. 183.1 - 184.7 °C,  $[\alpha]_D^{25} +99.0$  (c 0.1, CH<sub>3</sub>OH); <sup>1</sup>H NMR (400 MHz, CD<sub>3</sub>OD),  $\delta_H$  (ppm): 7.25 (t,  $J = 2.4$  Hz, 1H), 7.09 (d,  $J = 7.6$  Hz, 1H), 7.07–7.04 (m, 2H), 6.89 – 6.84(m, 2H), 6.78 (dd,  $J = 8.4, 2.0$  Hz, 1H), 5.23 (s, 1H), 4.08 – 4.05 (m, 2H), 3.95 – 3.87 (m, 3H), 3.75 (dd,  $J = 14.0, 4.4$  Hz, 1H), 3.61 – 3.56 (m, 1H), 3.50 (d,  $J = 3.2$  Hz, 1H), 3.30 – 3.26 (m, 1H), 3.09 (d,  $J = 13.2$  Hz, 1H). <sup>13</sup>C NMR (101 MHz, CD<sub>3</sub>OD),  $\delta_C$  (ppm): 155.1, 147.3, 131.8, 130.1, 124.4, 124.0, 121.9, 121.6, 120.1, 118.3, 116.0, 114.3, 74.9, 72.1, 70.1, 68.3, 66.3, 62.1, 56.0, 48.0. MS (ESI): Calculated for C<sub>22</sub>H<sub>24</sub>Br<sub>2</sub>N<sub>2</sub>NaO<sub>6</sub> ([M+Na]<sup>+</sup>): 592.9891, found: 592.9891.

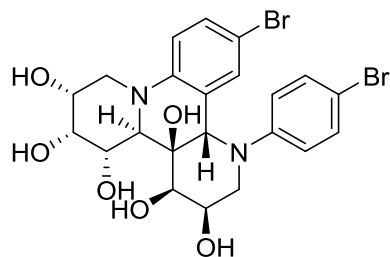

**(3R,4R,4aR,4bR,5S,6R,7R,13bS)-12-bromo-1-(4-bromophenyl)-1,3,4,5,6,7,8,13b-octahydro-2H-benzo[h]pyrido[2,1-f][1,6]naphthyridine-3,4,4a,5,6,7(4bH)-hexaol (5q).** Yellow solid, yield 85%, m.p. 187.3 - 189.5 °C,  $[\alpha]_D^{25} +202.0$  (*c* 0.1, CH<sub>3</sub>OH); <sup>1</sup>H NMR (400 MHz, CD<sub>3</sub>OD),  $\delta_H$  (ppm): 7.33 – 7.30 (m, 2H), 7.22(dd, *J* = 8.8, 2.4 Hz, 1H), 7.08 (dd, *J* = 2.4, 0.8 Hz, 1H), 7.05 – 7.03 (m, 2H), 6.84 (d, *J* = 8.8 Hz, 1H), 5.28 (s, 1H), 4.07 – 4.03 (m, 2H), 3.94 (d, *J* = 2.8 Hz, 1H), 3.92 – 3.88 (m, 2H), 3.77 (dd, *J* = 14.0, 4.4 Hz, 1H), 3.58 – 3.54 (m, 1H), 3.49 (d, *J* = 3.2 Hz, 1H), 3.30 – 3.25 (m, 1H), 3.10 (d, *J* = 14.4 Hz, 1H). <sup>13</sup>C NMR (100 MHz, CD<sub>3</sub>OD),  $\delta_C$  (ppm): 152.8, 145.1, 133.1, 132.8, 130.9, 123.5, 117.4, 115.3, 110.8, 110.5, 75.0, 73.6, 72.1, 70.0, 68.3, 66.3, 62.2, 56.0, 48.0. MS (ESI): Calculated for C<sub>22</sub>H<sub>24</sub>Br<sub>2</sub>N<sub>2</sub>KO<sub>6</sub> ([M+K]<sup>+</sup>): 609.0001, found: 609.0002.

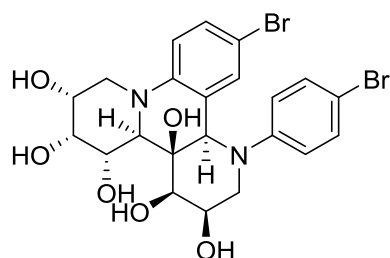

**(3R,4R,4aR,4bR,5S,6R,7R,13bR)-12-bromo-1-(4-bromophenyl)-1,3,4,5,6,7,8,13b-octahydro-2H-benzo[h]pyrido[2,1-f][1,6]naphthyridine-3,4,4a,5,6,7(4bH)-hexaol (5q-1).** Yellow solid, yield 6%, m.p. 122.3 - 123.5 °C,  $[\alpha]_D^{25} +64.0$  (*c* 0.1, CH<sub>3</sub>OH); <sup>1</sup>H NMR (400 MHz, CD<sub>3</sub>OD),  $\delta_H$  (ppm): 7.41 (d, *J* = 2.4 Hz, 1H), 7.29 (dd, *J* = 8.8, 2.4 Hz, 1H), 7.11 (d, *J* = 8.8 Hz, 2H), 6.84 (d, *J* = 8.8 Hz, 1H), 6.34 (d, *J* = 8.8 Hz, 2H), 4.85 (s, 1H), 4.10 – 4.05 (m, 1H), 3.99 (d, *J* = 8.4 Hz, 2H), 3.73 (dd, *J* = 10.4, 2.8 Hz, 1H), 3.69 – 3.65 (m, 1H), 3.59 – 3.54 (m, 1H), 3.51 (d, *J* = 10.4 Hz, 1H), 3.26 – 3.17 (m, 2H), 3.06 (dd, *J* = 13.2, 4.8 Hz, 1H). <sup>13</sup>C NMR (100 MHz, CD<sub>3</sub>OD),  $\delta_C$  (ppm): 147.8, 141.6, 132.2, 131.8, 131.3, 127.6, 125.4, 114.3, 114.2, 109.9, 107.8,

79.9, 79.1, 77.8, 73.3, 72.2, 69.0, 64.8, 55.2, 46.8, 45.1. MS (ESI): Calculated for  $C_{22}H_{24}Br_2N_2NaO_6$  ( $[M+Na]^+$ ): 592.9899, found: 592.9899.

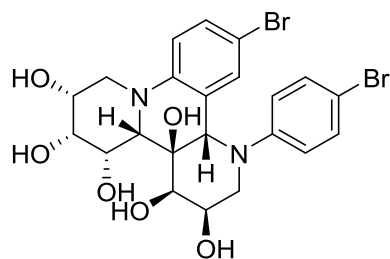

**(3R,4R,4aR,4bS,5S,6R,7R,13bS)-12-bromo-1-(4-bromophenyl)-1,3,4,5,6,7,8,13b-octahydro-2H-benzo[h]pyrido[2,1-f][1,6]naphthyridine-3,4,4a,5,6,7(4bH)-hexaol (5q-2).** Yellow solid, yield 1%, m.p. 205.6 - 206.5 °C,  $[\alpha]_D^{25} +165.0$  (*c* 0.1,  $CH_3OH$ );  $^1H$  NMR (400 MHz,  $CD_3OD$ ),  $\delta_H$  (ppm): 7.32 – 7.29 (m, 2H), 7.25 (dd, *J* = 8.8, 2.4 Hz, 1H), 7.04 – 6.99 (m, 3H), 6.95 (dd, *J* = 2.4, 1.2 Hz, 1H), 5.18 (s, 1H), 4.42 (t, *J* = 2.4 Hz, 1H), 4.07 (dd, *J* = 13.0, 2.8 Hz, 1H), 4.02 (q, *J* = 2.4 Hz, 1H), 3.92 – 3.88 (m, 2H), 3.61 (d, *J* = 3.2 Hz, 1H), 3.54 (d, *J* = 2.8 Hz, 1H), 3.17 – 3.13 (m, 1H), 3.02 (dd, *J* = 13.0, 1.6 Hz, 1H), 2.93 (s, 1H).  $^{13}C$  NMR (100 MHz,  $CD_3OD$ ),  $\delta_C$  (ppm): 152.4, 148.6, 133.1, 132.3, 130.0, 126.2, 121.7, 117.6, 113.1, 110.7, 73.6, 71.6, 71.2, 70.8, 70.2, 69.5, 67.1, 65.7, 64.3, 60.2. MS (ESI): Calculated for  $C_{22}H_{24}Br_2N_2NaO_6$  ( $[M+Na]^+$ ): 592.9899, found: 592.9895.

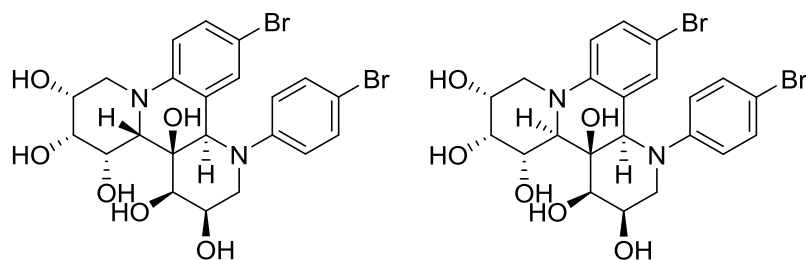

**Mixture (5q-3 and 5q-1).**  $^1H$  NMR (400 MHz,  $MeOD$ ),  $\delta_H$  (ppm): 4.87 (s, 1H), 4.84 (s, 1H). MS (ESI): Calculated for  $C_{22}H_{24}Br_2N_2NaO_6$  ( $[M+Na]^+$ ): 592.9899, found: 592.9901.

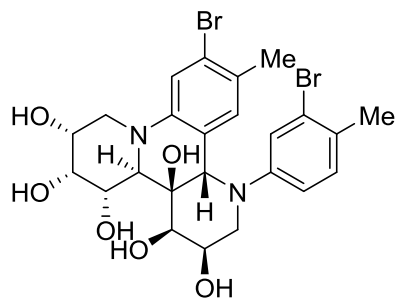

**(3R,4R,4aR,4bR,5S,6R,7R,13bS)-11-bromo-1-(3-bromo-4-methylphenyl)-12-methyl-1,3,4,5,6,7,8,13b-octahydro-2H-benzo[h]pyrido[2,1-f][1,6]naphthyridine-3,4,4a,5,6,7(4bH)-hexaol (5s).** Yellow solid, yield 51%, m.p. 173.3 - 173.9 °C,  $[\alpha]_D^{25} +67.0$  (*c* 0.1, CH<sub>3</sub>OH); <sup>1</sup>H NMR (400 MHz, CD<sub>3</sub>OD),  $\delta_H$  (ppm): 7.29 (d, *J* = 2.8 Hz, 1H), 7.11 – 7.08 (m, 2H), 7.00 (dd, *J* = 8.8, 2.8 Hz, 1H), 6.88 (s, 1H), 5.16 (s, 1H), 4.05 – 4.01 (m, 2H), 3.90 (dd, *J* = 10.4, 2.8 Hz, 1H), 3.87 – 3.83 (m, 2H), 3.70 (dd, *J* = 13.6, 4.0 Hz, 1H), 3.58 – 3.56 (m, 1H), 3.50 (d, *J* = 3.2 Hz, 1H), 3.30 – 3.24 (m, 1H), 3.11 – 3.07 (m, 1H), 2.27 (s, 3H), 2.14 (s, 3H). <sup>13</sup>C NMR (100 MHz, CD<sub>3</sub>OD),  $\delta_C$  (ppm): 151.7, 143.8, 130.9, 129.0, 126.5, 126.2, 125.1, 124.7, 119.5, 117.8, 115.5, 113.6, 73.8, 72.3, 70.8, 68.6, 67.0, 64.9, 60.8, 54.6, 46.7, 20.6, 20.4. MS (ESI): Calculated for C<sub>24</sub>H<sub>28</sub>Br<sub>2</sub>N<sub>2</sub>NaO<sub>6</sub> ([M+Na]<sup>+</sup>): 621.0204, found: 620.0204.

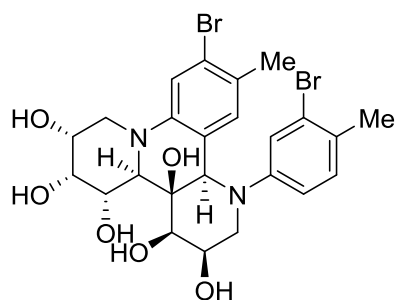

**(3R,4R,4aR,4bR,5S,6R,7R,13bR)-11-bromo-1-(3-bromo-4-methylphenyl)-12-methyl-1,3,4,5,6,7,8,13b-octahydro-2H-benzo[h]pyrido[2,1-f][1,6]naphthyridine-3,4,4a,5,6,7(4bH)-hexaol (5s-1).** Yellow solid, yield 26%, m.p. 173.3 - 173.9 °C,  $[\alpha]_D^{25} +12.0$  (*c* 0.1, CH<sub>3</sub>OH); <sup>1</sup>H NMR (400 MHz, CD<sub>3</sub>OD),  $\delta_H$  (ppm): 7.18 (s, 1H), 7.09 (s, 1H), 6.91 (d, *J* = 8.4 Hz, 1H), 6.52 (d, *J* = 2.4 Hz, 1H), 6.26 (dd, *J* = 8.4, 2.4 Hz, 1H), 4.83 (s, 1H), 4.07– 4.03 (m, 2H), 3.98 (t, *J* = 3.2 Hz, 1H), 3.72 (dd, *J* = 10.4, 2.8 Hz, 1H), 3.65 (dd, *J* = 13.2, 4.8 Hz, 1H), 3.57 (t, *J* = 3.6 Hz, 1H), 3.49 (d, *J* = 10.4 Hz, 1H), 3.21 (dd, *J* = 13.2, 3.2 Hz, 2H), 3.05 (dd, *J* = 13.2, 3.6 Hz, 1H), 2.26 (s, 3H),

2.19 (s, 3H).  $^{13}\text{C}$  NMR (400 MHz,  $\text{CD}_3\text{OD}$ ),  $\delta_{\text{C}}$  (ppm): 148.1, 141.7, 131.6, 130.5, 127.2, 125.3, 124.8, 124.5, 122.7, 116.0, 115.7, 111.9, 80.1, 79.2, 78.0, 72.9, 72.2, 69.1, 64.8, 63.0, 55.1, 53.4, 44.7, 29.4, 20.4. MS (ESI): Calculated for  $\text{C}_{24}\text{H}_{28}\text{Br}_2\text{N}_2\text{KO}_6$  ( $[\text{M}+\text{K}]^+$ ): 637.1314, found: 637.1314.

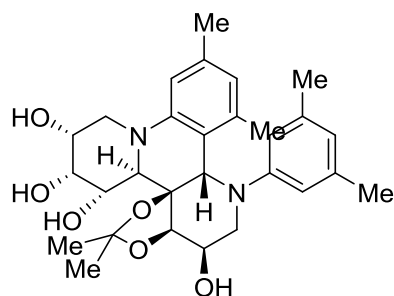

**(2R,3R,4S,4aR,4bR,7aR,8R,10aS)-10-(3,5-dimethylphenyl)-6,6,11,13-tetramethyl-2,3,4,4a,7a,8,10,10a-octahydro-1H,9H-benzo[*h*][1,3]dioxolo[4,5-*d*]pyrido[2,1-*f*][1,6]naphthyridine-2,3,4,8-tetraol (5t)**. Yellow solid, yield 80%, m.p. 119.3 - 120.9 °C,  $[\alpha]_{\text{D}}^{25} +48.0$  (*c* 0.1,  $\text{CH}_3\text{OH}$ );  $^1\text{H}$  NMR (400 MHz,  $\text{CD}_3\text{OD}$ ),  $\delta_{\text{H}}$  (ppm): 6.63 (s, 1H), 6.50 (s, 1H), 6.28 (s, 1H), 6.17 (s, 2H), 5.17 (d,  $J = 2.0$  Hz, 1H), 4.97 (s, 1H), 4.19 – 4.15 (m, 1H), 4.01 (d,  $J = 2.8$  Hz, 1H), 3.89 (dd,  $J = 9.6, 2.8$  Hz, 1H), 3.72 – 3.66 (m, 2H), 3.42 (d,  $J = 9.6$  Hz, 1H), 3.12 – 3.02 (m, 2H), 2.86 (dd,  $J = 13.2, 7.2$  Hz, 1H), 2.35 (s, 3H), 2.23 (s, 3H), 2.16 (s, 6H), 1.55 (s, 3H), 1.52 (s, 3H).  $^{13}\text{C}$  NMR (100 MHz,  $\text{CD}_3\text{OD}$ ),  $\delta_{\text{C}}$  (ppm): 149.5, 146.3, 140.9, 140.3, 139.5, 123.3, 120.5, 118.5, 115.2, 112.8, 112.4, 91.2, 89.2, 83.1, 78.7, 73.0, 69.8, 66.8, 57.0, 47.3, 28.7, 28.2, 21.8, 21.7, 19.7. MS (ESI): Calculated for  $\text{C}_{29}\text{H}_{38}\text{N}_2\text{KO}_6$  ( $[\text{M}+\text{K}]^+$ ): 549.2730, found: 549.2731.

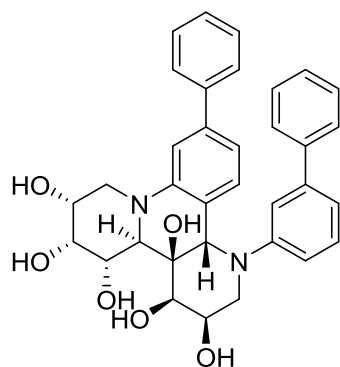

**(3R,4R,4aR,4bR,5S,6R,7R,13bS)-1-([1,1'-biphenyl]-3-yl)-11-phenyl-1,3,4,5,6,7,8,13b-octahydro-2H-benzo[*h*]pyrido[2,1-*f*][1,6]naphthyridine-3,4,4a,5,6,7(4bH)-hex**



**anol (5u).** Yellow solid, yield 78%, m.p. 182.1 - 184.0 °C,  $[\alpha]_D^{25} +309.0$  (*c* 0.1, CH<sub>3</sub>OH); <sup>1</sup>H NMR (400 MHz, CD<sub>3</sub>OD),  $\delta_H$  (ppm): 7.49 (dd, *J* = 12.0, 8.0 Hz, 4H), 7.38 – 7.32 (m, 6H), 7.26 (t, *J* = 7.2 Hz, 2H), 7.22 (d, *J* = 7.6 Hz, 1H), 7.17 (dd, *J* = 8.8, 6.0 Hz, 3H), 6.92 (d, *J* = 9.2 Hz, 1H), 5.37 (s, 1H), 4.10 (d, *J* = 2.8 Hz, 1H), 4.04 (d, *J* = 10.8 Hz, 1H), 4.00 – 3.94 (m, 2H), 3.90 (d, *J* = 3.6 Hz, 1H), 3.85 (dd, *J* = 13.6, 4.4 Hz, 1H), 3.67 – 3.65 (m, 1H), 3.60 (d, *J* = 3.2 Hz, 1H), 3.30 – 3.22 (m, 2H). <sup>13</sup>C NMR (100 MHz, CD<sub>3</sub>OD),  $\delta_C$  (ppm): 152.1, 144.0, 141.1, 140.7, 131.5, 131.2, 129.0, 129.0, 128.3, 128.0, 126.7, 126.6, 126.4, 126.2, 120.3, 115.4, 113.0, 74.4, 72.5, 71.1, 69.1, 67.6, 65.4, 61.6, 55.1, 47.9, 47.1. MS (ESI): Calculated for C<sub>33</sub>H<sub>34</sub>N<sub>2</sub>NaO<sub>6</sub> ([M+Na]<sup>+</sup>): 589.2417, found: 589.2415.

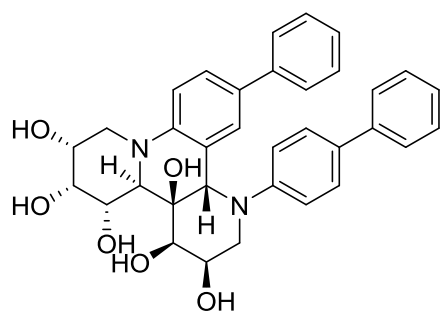

**(3R,4R,4aR,4bR,5S,6R,7R,13bS)-1-([1,1'-biphenyl]-4-yl)-12-phenyl-1,3,4,5,6,7,8,13b-octahydro-2H-benzo[h]pyrido[2,1-f][1,6]naphthyridine-3,4,4a,5,6,7(4bH)-hexanol (5v).** Yellow solid, yield 49%, m.p. 168.5 - 169.9 °C,  $[\alpha]_D^{25} +102.0$  (*c* 0.1, CH<sub>3</sub>OH); <sup>1</sup>H NMR (400 MHz, CD<sub>3</sub>OD),  $\delta_H$  (ppm): 7.58 – 7.56 (m, 3H), 7.53 – 7.51 (m, 2H), 7.39 – 7.35 (m, 4H), 7.30 – 7.27 (m, 3H), 7.18 (d, *J* = 8.0 Hz, 1H), 7.11 (dd, *J* = 8.4, 2.4 Hz, 1H), 7.06 (d, *J* = 1.6 Hz, 1H), 6.97 (d, *J* = 7.2 Hz, 1H), 6.87 (dd, *J* = 8.0, 1.6 Hz, 1H), 5.40 (s, 1H), 4.08 – 4.01 (m, 4H), 3.96 (dd, *J* = 16.0, 2.8 Hz, 1H), 3.92 (d, *J* = 4.0 Hz, 1H), 3.72 – 3.67 (m, 1H), 3.63 (d, *J* = 3.2 Hz, 1H), 3.45 – 3.32 (m, 1H), 3.26 (d, *J* = 14.8 Hz, 1H). <sup>13</sup>C NMR (100 MHz, CD<sub>3</sub>OD),  $\delta_C$  (ppm): 153.3, 145.3, 143.3, 143.0, 142.4, 141.9, 130.4, 129.2, 129.2, 128.9, 127.9, 127.8, 127.6, 119.5, 117.8, 117.6, 114.2, 113.9, 111.5, 74.5, 72.9, 71.4, 69.5, 67.9, 65.7, 61.6, 55.5, 49.0, 47.4. MS (ESI): Calculated for C<sub>33</sub>H<sub>34</sub>N<sub>2</sub>NaO<sub>6</sub> ([M+Na]<sup>+</sup>): 589.2417, found: 589.2416.

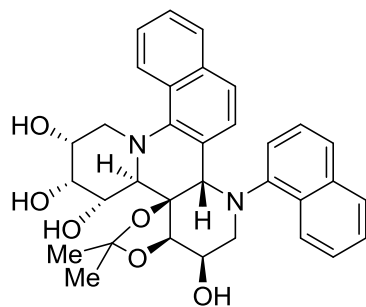

**(3aR,4R,6aS,15R,16R,17S,17aR,17bR)-2,2-dimethyl-6-(naphthalen-1-yl)-3a,4,6,6a,15,16,17,17a-octahydro-5H,14H-[1,3]dioxolo[4,5-d]naphtho[1,2-h]pyrido[2,1-f][1,6]naphthyridine-4,15,16,17-tetraol (5w)**. Yellow solid, yield 70%, m.p. 128.5 - 129.9 °C,  $[\alpha]_{\text{D}}^{25} +144.0$  (c 0.1, CH<sub>3</sub>OH); <sup>1</sup>H NMR (400 MHz, CDCl<sub>3</sub>),  $\delta_{\text{H}}$  (ppm): 8.55 (d, *J* = 8.4 Hz, 1H), 7.81 (d, *J* = 8.0 Hz, 1H), 7.67 (d, *J* = 8.4 Hz, 1H), 7.64 – 7.57 (m, 2H), 7.54 (d, *J* = 7.6 Hz, 1H), 7.47 (t, *J* = 7.6 Hz, 1H), 7.31 – 7.28 (m, 2H), 7.25 (d, *J* = 6.8 Hz, 1H), 7.19 (d, *J* = 8.0 Hz, 1H), 6.93 (t, *J* = 7.6 Hz, 1H), 6.53 (d, *J* = 7.6 Hz, 1H), 5.29 (s, 1H), 5.08 (s, 1H), 4.72 (s, 2H), 4.64 – 4.60 (m, 2H), 4.54 (t, *J* = 6.0 Hz, 1H), 4.34 – 4.27 (m, 2H), 4.10 (s, 1H), 3.74 – 3.71 (m, 1H), 3.67 (s, 1H), 3.45 – 3.32 (m, 2H), 3.23 (d, *J* = 12.8 Hz, 1H), 1.59 (s, 3H), 1.42 (s, 3H). <sup>13</sup>C NMR (100 MHz, CDCl<sub>3</sub>),  $\delta_{\text{C}}$  (ppm): 143.1, 142.8, 134.4, 134.2, 128.5, 128.3, 126.6, 126.5, 126.4, 126.1, 125.8, 125.0, 124.9, 124.8, 124.1, 123.9, 120.1, 118.3, 116.1, 105.0, 91.6, 88.3, 82.6, 82.0, 70.4, 69.7, 68.1, 62.4, 55.1, 46.4, 28.6, 28.2. MS (ESI): Calculated for C<sub>33</sub>H<sub>34</sub>N<sub>2</sub>KO<sub>6</sub> ([M+K]<sup>+</sup>): 555.2417, found: 555.2415.

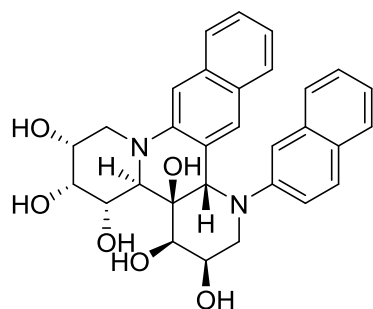

**(3R,4R,4aR,4bR,5S,6R,7R,15bS)-1-(naphthalen-2-yl)-1,3,4,5,6,7,8,15b-octahydro-2H-naphtho[2,3-h]pyrido[2,1-f][1,6]naphthyridine-3,4,4a,5,6,7(4bH)-hexaol (5x)**. Yellow solid, yield 68%, m.p. 147.5 - 147.9 °C,  $[\alpha]_{\text{D}}^{25} +70.0$  (c 0.1, CH<sub>3</sub>OH); <sup>1</sup>H NMR (400 MHz, CD<sub>3</sub>OD),  $\delta_{\text{H}}$  (ppm): 8.08 (d, *J* = 8.8 Hz, 1H), 7.77 (dd, *J* = 14.0, 9.2 Hz, 2H), 7.50 (d, *J* = 8.0 Hz, 1H), 7.45 – 7.42 (m, 1H), 7.38 (d, *J* = 8.4 Hz, 1H), 7.32

– 7.28 (m, 3H), 7.23 – 7.21 (m, 1H), 7.05 (t,  $J = 7.6$  Hz, 1H), 6.46 (d,  $J = 2.0$  Hz, 1H), 6.06 (dd,  $J = 8.8, 2.4$  Hz, 1H), 5.53 (s, 1H), 4.29 (d,  $J = 8.4$  Hz, 1H), 4.25 – 4.22 (m, 1H), 3.97 – 3.92 (m, 2H), 3.77 (dd,  $J = 10.4, 2.4$  Hz, 1H), 3.68 (d,  $J = 10.0$  Hz, 1H), 3.61 – 3.59 (m, 1H), 3.54 – 3.50 (m, 1H), 3.25 – 3.15 (m, 2H).  $^{13}\text{C}$  NMR (100 MHz,  $\text{CD}_3\text{OD}$ ),  $\delta_{\text{C}}$  (ppm): 147.5, 141.7, 136.6, 134.6, 131.5, 130.7, 129.6, 129.3, 129.1, 128.8, 128.4, 127.9, 126.9, 125.2, 123.9, 122.5, 119.0, 115.9, 114.6, 105.3, 80.8, 79.9, 79.5, 74.5, 73.5, 69.8, 67.1, 64.3, 56.2, 45.9. MS (ESI): Calculated for  $\text{C}_{30}\text{H}_{31}\text{N}_2\text{O}_6$  ( $[\text{M}+\text{H}]^+$ ): 515.2140, found: 515.2142.

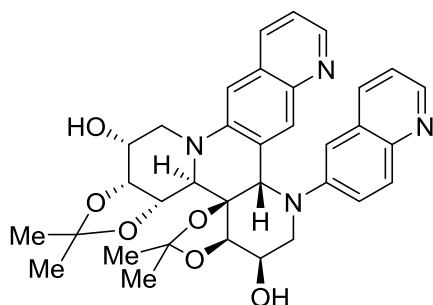

**(3R,4R,4aR,4bR,5S,6R,7R,15bS)-1-(quinolin-6-yl)-1,3,4,5,6,7,8,15b-octahydro-2H-pyrido[2,1-f]quinolino[6,7-h][1,6]naphthyridine-3,4,4a,5,6,7(4bH)-hexaol (5y'')**. Yellow solid, yield 60%, m.p. 106.3 - 107.9 °C,  $[\alpha]_{\text{D}}^{25} -5.0$  ( $c$  0.1,  $\text{CH}_3\text{OH}$ );  $^1\text{H}$  NMR (400 MHz,  $\text{CD}_3\text{OD}$ ),  $\delta_{\text{H}}$  (ppm): 8.56 (dd,  $J = 4.4, 1.6$  Hz, 1H), 8.50 (d,  $J = 8.4$  Hz, 1H), 8.42 (dd,  $J = 4.4, 1.6$  Hz, 1H), 7.98 (dd,  $J = 8.4, 1.6$  Hz, 1H), 7.88 (d,  $J = 9.2$  Hz, 1H), 7.69 (d,  $J = 9.2$  Hz, 1H), 7.53 (d,  $J = 9.6$  Hz, 1H), 7.47 (dd,  $J = 8.4, 4.0$  Hz, 1H), 7.29 (dd,  $J = 8.4, 4.4$  Hz, 1H), 7.20 (dd,  $J = 9.2, 2.4$  Hz, 1H), 6.77 (d,  $J = 2.8$  Hz, 1H), 5.12 – 5.11 (m, 2H), 4.78 (t,  $J = 7.2$  Hz, 1H), 4.57 – 4.53 (m, 1H), 4.49 (dd,  $J = 6.8, 3.6$  Hz, 1H), 4.17 – 4.15 (m, 1H), 3.81 (dd,  $J = 12.0, 3.6$  Hz, 1H), 3.60 (s, 1H), 3.47 (dd,  $J = 13.6, 6.0$  Hz, 1H), 3.41 – 3.35 (m, 3H), 1.53 (s, 3H), 1.51 (s, 3H), 1.47 (s, 3H), 1.35 (s, 3H).  $^{13}\text{C}$  NMR (100 MHz,  $\text{CD}_3\text{OD}$ ),  $\delta_{\text{C}}$  (ppm): 148.2, 147.4, 146.1, 145.7, 143.3, 143.3, 135.9, 133.4, 131.9, 131.1, 130.9, 129.4, 123.5, 123.2, 122.5, 121.5, 116.5, 110.8, 110.6, 103.5, 87.4, 86.7, 82.6, 76.9, 76.0, 74.3, 66.5, 56.7, 50.3, 49.0, 46.8, 29.1, 27.6, 27.5, 25.3. MS (ESI): Calculated for  $\text{C}_{34}\text{H}_{37}\text{N}_4\text{O}_6$  ( $[\text{M}+\text{H}]^+$ ): 596.2417, found: 597.2415.

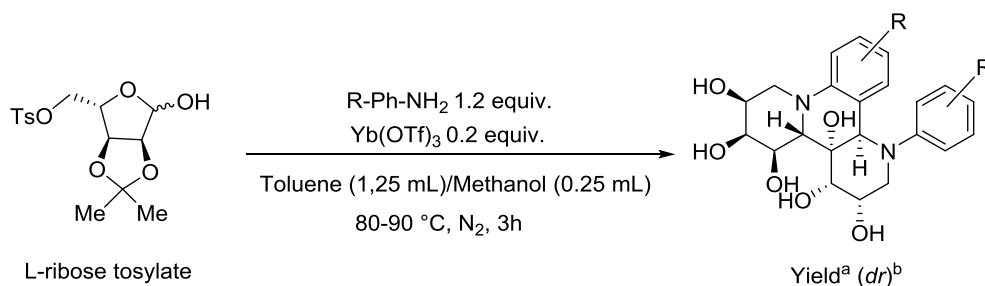

**Fig. 2.** Synthesis of the complex multicyclic iminosugars using L-ribose tosylate

**General experimental procedure 2:** L-Ribose tosylate (206 mg, 0.6 mmol), aniline (1.2 equiv.) and Yb(OTf)<sub>3</sub> (0.2 equiv.) were added into a 25 mL flask, 1.50 mL toluene and methanol (V:V=5:1) as the mixed solvent. Then the solution was stirred at the temperature of 80 – 90 °C under N<sub>2</sub> atmosphere for 3 h. Upon completion, The mixture was cooled to room temperature, 20 ml of methanol was added to dissolve the solid residue, and the solvent was evaporated in vacuo. The crude product was purified by column chromatography (dichloromethane:methanol V/V = 15:1) to give **6a'** as a pale yellow solid.

Under similar conditions, different aromatic amines were used as raw materials for the reaction, and the corresponding products were obtained respectively.

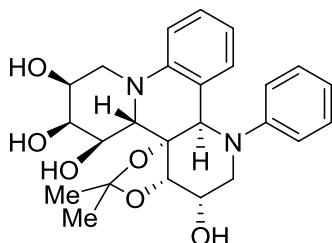

**(2S,3R,4S,4aR,4bR,7aR,8S,10aS)-6,6-dimethyl-10-phenyl-2,3,4,4a,7a,8,10,10a-octahydro-1H,9H-benzo[*h*][1,3]dioxolo[4,5-*d*]pyrido[2,1-*f*][1,6]naphthyridine-2,3,4,8-tetraol (6a')**. Yellow solid, yield 69%, m.p. 123.5 - 124.9 °C,  $[\alpha]_D^{25}$  -33.0 (*c* 0.1, CH<sub>3</sub>OH); <sup>1</sup>H NMR (400 MHz, CD<sub>3</sub>OD),  $\delta_H$  (ppm): 7.24 (t, *J* = 7.6 Hz, 2H), 7.12 (t, *J* = 8.0 Hz, 1H), 6.95 – 6.89 (m, 4H), 6.70 (t, *J* = 7.6 Hz, 1H), 6.63 (t, *J* = 7.6 Hz, 1H), 5.26 (s, 1H), 4.44 (d, *J* = 2.4 Hz, 1H), 4.06 (d, *J* = 2.8 Hz, 1H), 3.88 – 3.82 (m, 2H), 6.72 (d, *J* = 14.4 Hz, 1H), 3.70 – 3.63 (m, 2H), 3.28 – 3.23 (m, 2H), 3.09 (dd, *J* = 10.0, 6.8 Hz, 1H), 1.52 (s, 3H), 1.24 (s, 3H). <sup>13</sup>C NMR (101 MHz, CD<sub>3</sub>OD),  $\delta_C$  (ppm): 151.1, 144.5, 130.4, 130.0, 128.6, 123.7, 119.9, 117.7, 113.6, 112.6, 112.5, 83.7, 81.9,

73.4, 69.9, 66.2, 65.6, 64.3, 63.4, 55.1, 46.1, 27.3, 27.2. MS (ESI): Calculated for  $C_{24}H_{27}N_2KO_6$  ( $[M+K]^+$ ): 478.1869, found: 478.1870.

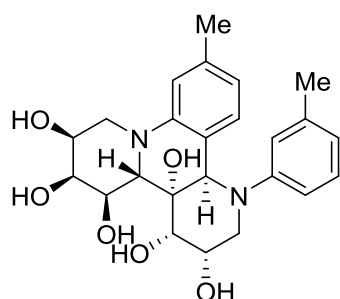

**(3S,4R,4aR,4bR,5S,6R,7S,13bS)-11-methyl-1-(m-tolyl)-1,3,4,5,6,7,8,13b-octahydro-2H-benzo[h]pyrido[2,1-f][1,6]naphthyridine-3,4,4a,5,6,7(4bH)-hexaol (6c).**

Yellow solid, yield 56%, m.p. 170.5 - 171.9 °C,  $[\alpha]_D^{25}$  -156.0 (*c* 0.1, CH<sub>3</sub>OH); <sup>1</sup>H NMR (400 MHz, CD<sub>3</sub>OD),  $\delta_H$  (ppm): 7.09 (t, *J* = 8.0 Hz, 1H), 6.91 – 6.86 (m, 3H), 6.74 (s, 1H), 6.55 (d, *J* = 7.6 Hz, 1H), 6.46 (d, *J* = 8.0 Hz, 1H), 5.29 (s, 1H), 4.03 (d, *J* = 10.4 Hz, 2H), 3.93 – 3.90 (m, 1H), 3.88 – 3.81 (m, 3H), 3.57 (d, *J* = 3.6 Hz, 1H), 3.54 (d, *J* = 3.2 Hz, 1H), 3.29 – 3.23 (m, 1H), 3.10 (d, *J* = 14.0 Hz, 1H), 2.28 (s, 3H), 2.24 (s, 3H). <sup>13</sup>C NMR (100 MHz, CD<sub>3</sub>OD),  $\delta_C$  (ppm): 153.9, 145.7, 140.1, 139.8, 130.2, 128.7, 112.0, 119.6, 118.5, 116.2, 113.8, 112.8, 75.1, 73.8, 72.2, 70.0, 68.5, 66.3, 64.3, 61.9, 56.0, 47.8, 21.9, 21.6. MS (ESI): Calculated for  $C_{24}H_{30}N_2KO_6$  ( $[M+K]^+$ ): 478.1869, found: 478.1869.

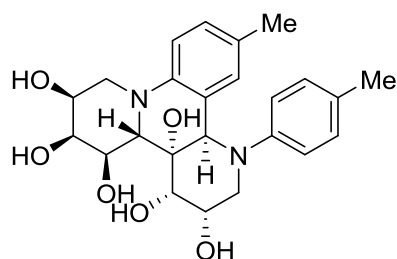

**(3S,4R,4aR,4bR,5S,6R,7S,13bS)-12-methyl-1-(p-tolyl)-1,3,4,5,6,7,8,13b-octahydro-2H-benzo[h]pyrido[2,1-f][1,6]naphthyridine-3,4,4a,5,6,7(4bH)-hexaol (6d).**

Yellow solid, yield 78%, m.p. 179.5 - 180.2 °C,  $[\alpha]_D^{25}$  -38.0 (*c* 0.1, CH<sub>3</sub>OH); <sup>1</sup>H NMR (400 MHz, CD<sub>3</sub>OD),  $\delta_H$  (ppm): 7.03 – 6.97 (m, 4H), 6.92 (dd, *J* = 8.4, 2.0 Hz, 1H), 6.87 (d, *J* = 2.4 Hz, 1H), 6.79 (d, *J* = 8.8 Hz, 1H), 5.25 (s, 1H), 4.03 – 3.99 (m, 2H), 3.90 – 3.82 (m, 3H), 3.78 (dd, *J* = 14.0, 4.4 Hz, 1H), 3.59 – 3.55 (m, 1H), 3.53 (d, *J* = 2.8 Hz, 1H), 3.25 (dd, *J* = 14.0, 11.6 Hz, 1H), 3.10 (d, *J* = 13.2 Hz, 1H), 2.23 (s,

3H), 2.08 (s, 3H).  $^{13}\text{C}$  NMR (100 MHz,  $\text{CD}_3\text{OD}$ ),  $\delta_{\text{C}}$  (ppm): 151.7, 143.5, 130.8, 130.5, 129.0, 128.3, 127.9, 121.5, 115.6, 113.4, 75.2, 73.8, 72.3, 69.9, 68.5, 66.2, 62.2, 56.00, 47.9, 20.5, 20.4. MS (ESI): Calculated for  $\text{C}_{24}\text{H}_{30}\text{N}_2\text{NaO}_6$  ( $[\text{M}+\text{Na}]^+$ ): 462.1869, found: 462.1869.

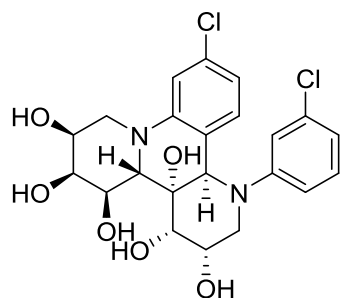

**(3S,4R,4aR,4bR,5S,6R,7S,13bS)-11-chloro-1-(3-chlorophenyl)-1,3,4,5,6,7,8,13b-octahydro-2H-benzo[h]pyrido[2,1-f][1,6]naphthyridine-3,4,4a,5,6,7(4bH)-hexaol**

**(6n)**. Yellow solid, yield 77%, m.p. 162.5 - 163.1 °C,  $[\alpha]_{\text{D}}^{25}$  -92.0 (*c* 0.1,  $\text{CH}_3\text{OH}$ );  $^1\text{H}$  NMR (400 MHz,  $\text{CD}_3\text{OD}$ ),  $\delta_{\text{H}}$  (ppm): 7.17 (t,  $J = 8.0$  Hz, 1H), 7.10 (d,  $J = 2.4$  Hz, 1H), 7.02 (dd,  $J = 8.4, 2.4$  Hz, 1H), 6.96 – 6.92 (m, 2H), 6.72 – 6.64 (m, 2H), 5.26 (s, 1H), 4.08 – 4.05 (m, 2H), 3.96 – 3.88 (m, 3H), 3.76 (dd,  $J = 13.6, 4.4$  Hz, 1H), 3.62 – 3.57 (m, 2H), 3.51 (d,  $J = 3.2$  Hz, 1H), 3.09 (d,  $J = 13.6$  Hz, 1H).  $^{13}\text{C}$  NMR (100 MHz,  $\text{CD}_3\text{OD}$ ),  $\delta_{\text{C}}$  (ppm): 155.0, 147.1, 136.2, 131.6, 129.9, 119.7, 118.9, 118.6, 115.4, 113.8, 113.1, 74.8, 73.7, 72.0, 70.0, 68.2, 66.2, 62.0, 56.0. MS (ESI): Calculated for  $\text{C}_{22}\text{H}_{24}\text{Cl}_2\text{N}_2\text{KO}_6$  ( $[\text{M}+\text{K}]^+$ ): 521.1011, found: 521.1011.

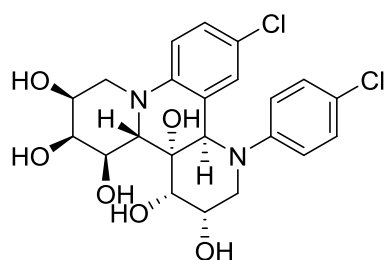

**(3S,4R,4aR,4bR,5S,6R,7S,13bS)-12-chloro-1-(4-chlorophenyl)-1,3,4,5,6,7,8,13b-octahydro-2H-benzo[h]pyrido[2,1-f][1,6]naphthyridine-3,4,4a,5,6,7(4bH)-hexaol**

**(6o)**. Yellow solid, yield 76%, m.p. 157.8 - 158.9 °C,  $[\alpha]_{\text{D}}^{25}$  -90.0 (*c* 0.1,  $\text{CH}_3\text{OH}$ );  $^1\text{H}$  NMR (400 MHz,  $\text{CD}_3\text{OD}$ ),  $\delta_{\text{H}}$  (ppm): 7.20 – 7.18 (m, 2H), 7.10 – 7.08 (m, 3H), 6.95 (d,  $J = 2.4$  Hz, 1H), 6.89 (d,  $J = 8.8$  Hz, 1H), 5.27 (s, 1H), 4.05 (d,  $J = 10.4$  Hz, 2H), 3.94 (d,  $J = 2.8$  Hz, 1H), 3.91 – 3.87 (m, 2H), 3.78 (dd,  $J = 14.0, 4.4$  Hz, 1H), 3.59 –

3.54 (m, 1H), 3.49 (d,  $J = 3.2$  Hz, 1H), 3.29 – 3.25 (m, 1H), 3.10 (d,  $J = 14.4$  Hz, 1H).  
 $^{13}\text{C}$  NMR (100 MHz,  $\text{CD}_3\text{OD}$ ),  $\delta_{\text{C}}$  (ppm): 152.4, 144.7, 130.1, 129.9, 128.0, 123.8, 123.5, 123.1, 117.0, 114.9, 75.0, 73.7, 72.1, 69.9, 68.3, 66.2, 64.3, 62.3, 56.0, 48.0.  
 MS (ESI): Calculated for  $\text{C}_{22}\text{H}_{24}\text{Cl}_2\text{N}_2\text{NaO}_6$  ( $[\text{M}+\text{Na}]^+$ ): 505.1011, found: 505.1010.

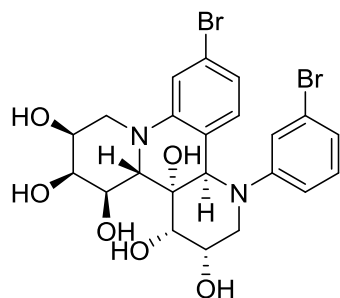

**(3*S*,4*R*,4*aR*,4*bR*,5*S*,6*R*,7*S*,13*bS*)-11-bromo-1-(3-bromophenyl)-1,3,4,5,6,7,8,13*b*-octahydro-2*H*-benzo[*h*]pyrido[2,1-*f*][1,6]naphthyridine-3,4,4*a*,5,6,7(4*bH*)-hexaol (6*p*)**. Yellow solid, yield 68%, m.p. 160.0 - 161.3 °C,  $[\alpha]_{\text{D}}^{25}$  -100.0 ( $c$  0.1,  $\text{CH}_3\text{OH}$ );  
 $^1\text{H}$  NMR (400 MHz,  $\text{CD}_3\text{OD}$ ),  $\delta_{\text{H}}$  (ppm): 7.25 (d,  $J = 2.4$  Hz, 1H), 7.09 (d,  $J = 8.0$  Hz, 1H), 7.07 – 7.04 (m, 2H), 6.87 (d,  $J = 8.4$  Hz, 1H), 6.85 – 6.83 (m, 1H), 6.78 (dd,  $J = 8.0, 1.6$  Hz, 1H), 5.22 (s, 1H), 4.06 (d,  $J = 10.8$  Hz, 2H), 3.95 – 3.87 (m, 3H), 3.75 (dd,  $J = 13.6, 4.4$  Hz, 1H), 3.60 – 3.55 (m, 1H), 3.49 (d,  $J = 2.8$  Hz, 1H), 3.30 – 3.26 (m, 1H), 3.11 – 3.06 (m, 1H).  $^{13}\text{C}$  NMR (101 MHz,  $\text{CD}_3\text{OD}$ ),  $\delta_{\text{C}}$  (ppm): 155.1, 147.3, 131.8, 130.1, 124.4, 124.0, 121.9, 121.6, 120.1, 118.3, 116.0, 114.3, 74.9, 73.6, 72.0, 70.0, 68.2, 66.3, 62.1, 56.0, 48.0. MS (ESI): Calculated for  $\text{C}_{22}\text{H}_{25}\text{Br}_2\text{N}_2\text{O}_6$  ( $[\text{M}+\text{H}]^+$ ): 571.0001, found: 571.0002.

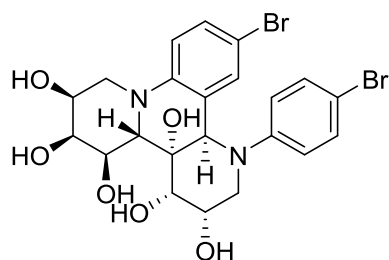

**(3*S*,4*R*,4*aR*,4*bR*,5*S*,6*R*,7*S*,13*bS*)-12-bromo-1-(4-bromophenyl)-1,3,4,5,6,7,8,13*b*-octahydro-2*H*-benzo[*h*]pyrido[2,1-*f*][1,6]naphthyridine-3,4,4*a*,5,6,7(4*bH*)-hexaol (6*q*)**. Yellow solid, yield 82%, m.p. 159.8 - 160.3 °C,  $[\alpha]_{\text{D}}^{25}$  -200.0 ( $c$  0.1,  $\text{CH}_3\text{OH}$ );  
 $^1\text{H}$  NMR (400 MHz,  $\text{CD}_3\text{OD}$ ),  $\delta_{\text{H}}$  (ppm): 7.32 – 7.30 (m, 2H), 7.22 (dd,  $J = 8.8, 2.4$  Hz, 1H), 7.08 (d,  $J = 2.4$  Hz, 1H), 7.05 – 7.03 (m, 2H), 6.84 (d,  $J = 9.2$  Hz, 1H), 5.28

(s, 1H), 4.05 (d,  $J = 10.4$  Hz, 2H), 3.93 (d,  $J = 2.8$  Hz, 1H), 3.92 – 3.87 (m, 2H), 3.77 (dd,  $J = 14.0, 4.4$  Hz, 1H), 3.56 (dt,  $J = 11.2, 4.4, 2.4$  Hz, 1H), 3.49 (d,  $J = 3.6$  Hz, 1H), 3.28 – 3.25 (m, 1H), 3.09 (d,  $J = 14.0$  Hz, 1H).  $^{13}\text{C}$  NMR (100 MHz,  $\text{CD}_3\text{OD}$ ),  $\delta_{\text{C}}$  (ppm): 152.8, 145.1, 133.1, 132.8, 130.9, 123.5, 117.4, 115.3, 110.8, 110.4, 745.0, 73.6, 72.1, 69.9, 68.3, 66.2, 62.2, 56.0, 48.0. MS (ESI): Calculated for  $\text{C}_{22}\text{H}_{25}\text{Br}_2\text{N}_2\text{O}_6$  ( $[\text{M}+\text{H}]^+$ ): 571.0001, found: 571.0001.

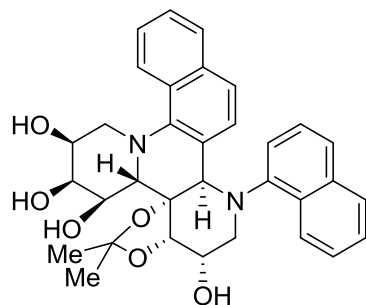

**(3aR,4S,6aS,15S,16R,17S,17aR,17bR)-2,2-dimethyl-6-(naphthalen-1-yl)-3a,4,6,6a,15,16,17,17a-octahydro-5H,14H-[1,3]dioxolo[4,5-d]naphtho[1,2-h]pyrido[2,1-f][1,6]naphthyridine-4,15,16,17-tetraol (6w')**. Yellow solid, yield 52%, m.p. 128.8 – 129.9 °C,  $[\alpha]_{\text{D}}^{25} -145.0$  ( $c$  0.1,  $\text{CH}_3\text{OH}$ );  $^1\text{H}$  NMR (400 MHz,  $\text{CD}_3\text{OD}$ ),  $\delta_{\text{H}}$  (ppm): 8.57 (d,  $J = 8.4$  Hz, 1H), 7.81 – 7.79 (m, 1H), 7.65 (d,  $J = 8.0$  Hz, 1H), 7.59 – 7.49 (m, 5H), 7.28 (dd,  $J = 8.0, 6.8$  Hz, 1H), 7.22 (t,  $J = 8.0$  Hz, 1H), 7.12 (d,  $J = 8.4$  Hz, 1H), 7.00 – 6.96 (m, 1H), 6.58 (d,  $J = 7.2$  Hz, 1H), 5.04 (s, 1H), 4.71 (d,  $J = 3.2$  Hz, 1H), 4.62 – 4.59 (m, 1H), 4.32 – 4.31 (m, 1H), 4.27 (t,  $J = 3.6$  Hz, 1H), 4.00 – 3.98 (m, 1H), 3.67 (dd,  $J = 12.8, 3.2$  Hz, 1H), 3.57 (s, 1H), 3.45 – 3.36 (m, 2H), 3.19 (d,  $J = 12.4$  Hz, 1H), 1.61 (s, 3H), 1.50 (s, 3H).  $^{13}\text{C}$  NMR (100 MHz,  $\text{CD}_3\text{OD}$ ),  $\delta_{\text{C}}$  (ppm): 144.7, 144.3, 135.8, 135.7, 131.1, 129.5, 129.4, 129.2, 127.5, 127.4, 127.0, 126.5, 125.9, 125.5, 125.4, 125.2, 121.5, 118.6, 117.1, 105.5, 92.3, 89.4, 83.5, 83.0, 71.800, 71.101, 68.9, 63.8, 56.9, 47.4, 28.9, 28.4. MS (ESI): Calculated for  $\text{C}_{33}\text{H}_{34}\text{N}_2\text{NaO}_6$  ( $[\text{M}+\text{Na}]^+$ ): 577.2417 found: 577.2416.



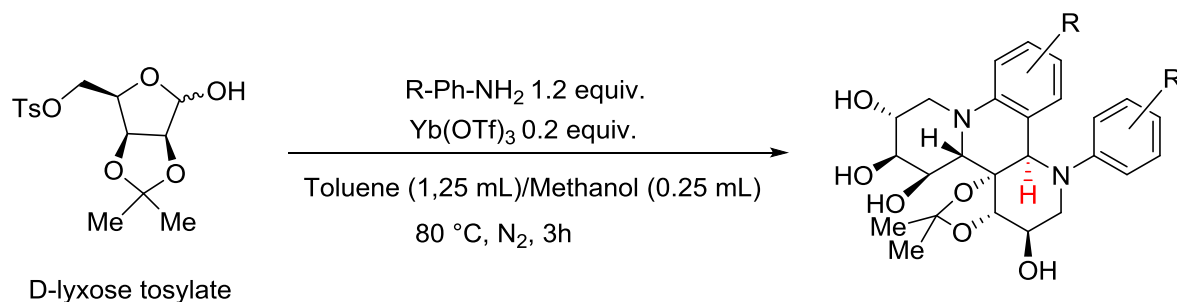

**Fig. 3.** Synthesis of the complex multicyclic iminosugars using D-lyxose tosylate

**General experimental procedure 3:** L-Lyxose tosylate (206 mg, 0.6 mmol), aniline (1.2 equiv.) and Yb(OTf)<sub>3</sub> (0.2 equiv.) were added into a 25 mL flask, 1.50 mL toluene and methanol (V:V=5:1) as the mixed solvent. Then the solution was stirred at the temperature of 80 °C under N<sub>2</sub> atmosphere for 3h. Upon completion, The mixture was cooled to room temperature, 20 ml of methanol was added to dissolve the solid residue, and the solvent was evaporated in vacuo. The crude product was purified by column chromatography (dichloromethane:methanol V/V = 15:1) to give **7a-1'** as a pale yellow solid.

Under similar conditions, different aromatic amines were used as raw materials for the reaction, and the corresponding products were obtained respectively.

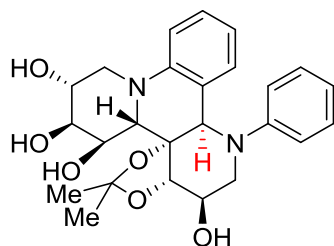

**(2*R*,3*S*,4*R*,4*aS*,4*bS*,7*aS*,8*R*,10*aR*)-6,6-dimethyl-10-phenyl-2,3,4,4*a*,7*a*,8,10,10*a*-octahydro-1*H*,9*H*-benzo[*h*][1,3]dioxolo[4,5-*d*]pyrido[2,1-*f*][1,6]naphthyridine-2,3,4,8-tetraol (**7a-1'**).** Yellow solid, yield 74%, m.p. 84.4 - 85.9 °C,  $[\alpha]_D^{25}$  -40.0 (*c* 0.1, CH<sub>3</sub>OH); <sup>1</sup>H NMR (400 MHz, CD<sub>3</sub>OD), δ<sub>H</sub> (ppm): 7.35 (dd, *J* = 7.6, 1.6 Hz, 1H), 7.16 – 7.12 (m, 1H), 7.10 – 7.06 (m, 2H), 6.95 (d, *J* = 8.4 Hz, 1H), 6.82 (t, *J* = 7.6 Hz, 1H), 6.66 (*J* = 8.0 Hz, 2H), 6.61 (t, *J* = 7.2 Hz, 1H), 4.89 (d, *J* = 3.2 Hz, 1H), 4.86 (s, 1H), 4.35 (dd, *J* = 8.0, 3.2 Hz, 1H), 4.00 (dt, *J* = 4.8, 2.4 Hz, 1H), 3.96 (dd, *J* = 4.8,

2.8 Hz, 1H), 3.86 (td,  $J = 6.4, 3.6$  Hz, 1H), 3.64 – 3.61 (m, 1H), 3.52 (dd,  $J = 13.6, 5.6$  Hz, 1H), 3.42 (dd,  $J = 13.2, 6.8$  Hz, 1H), 3.24 (dd,  $J = 13.2, 2.8$  Hz, 1H), 3.22 – 3.19 (m, 1H), 1.62 (s, 3H), 1.58 (s, 3H).  $^{13}\text{C}$  NMR (100 MHz,  $\text{CD}_3\text{OD}$ ),  $\delta_{\text{C}}$  (ppm): 149.9, 149.1, 131.1, 130.0, 129.6, 128.9, 124., 120.6, 118.4, 115.8, 115.6, 114.3, 95.1, 87.8, 81.4, 79.3, 72.8, 71.1, 68.0, 61.2, 50.5, 49.0, 44.0, 28.3, 28.3. MS (ESI): Calculated for  $\text{C}_{25}\text{H}_{31}\text{N}_2\text{O}_6$  ( $[\text{M}+\text{H}]^+$ ): 455.2104, found: 455.2105.

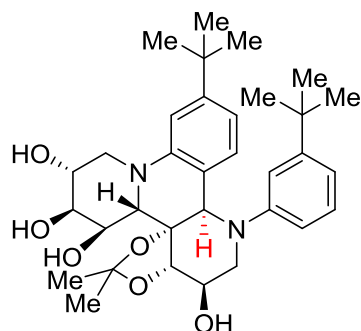

**(2R,3S,4R,4aS,4bS,7aS,8R,10aR)-13-(tert-butyl)-10-(3-(tert-butyl)phenyl)-6,6-dimethyl-2,3,4,4a,7a,8,10,10a-octahydro-1H,9H-benzo[h][1,3]dioxolo[4,5-d]pyrido[2,1-f][1,6]naphthyridine-2,3,4,8-tetraol (7e-1')**. Yellow solid, yield 80%, m.p. 88.1 - 90.1 °C,  $[\alpha]_{\text{D}}^{25} -25.0$  ( $c$  0.1,  $\text{CH}_3\text{OH}$ );  $^1\text{H}$  NMR (400 MHz,  $\text{CD}_3\text{OD}$ ),  $\delta_{\text{H}}$  (ppm): 7.26 (d,  $J = 8.0$  Hz, 1H), 7.02 (t,  $J = 7.6$  Hz, 1H), 6.99 (s, 1H), 6.89 (dd,  $J = 8.0, 1.6$  Hz, 1H), 6.74 (t,  $J = 2.4$  Hz, 1H), 6.70 – 6.67 (m, 1H), 6.48 (dd,  $J = 8.0, 2.4$  Hz, 1H), 4.85 (s, 1H), 4.83 (d,  $J = 3.2$  Hz, 1H), 4.33 (dd,  $J = 7.6, 3.2$  Hz, 1H), 4.03 – 4.00 (m, 1H), 3.96 (dd,  $J = 5.2, 2.8$  Hz, 1H), 3.88 – 3.84 (m, 1H), 3.61 – 3.57 (m, 1H), 3.57 – 3.52 (m, 1H), 3.42 (dd,  $J = 13.6, 6.8$  Hz, 1H), 3.28 – 3.25 (m, 1H), 3.19 (d,  $J = 7.2$  Hz, 1H), 1.62 (s, 3H), 1.57 (s, 3H), 1.28 (s, 9H), 1.26 (s, 9H).  $^{13}\text{C}$  NMR (100 MHz,  $\text{CD}_3\text{OD}$ ),  $\delta_{\text{C}}$  (ppm): 153.1, 152.6, 149.6, 148.6, 129.7, 128.5, 121.8, 118.3, 115.8, 113.4, 112.0, 111.7, 95.2, 87.9, 81.4, 79.3, 73.1, 71.2, 68.3, 61.7, 51.0, 44.2, 35.7, 35.4, 31.9, 31.8, 28.3, 28.1, 28.0. MS (ESI): Calculated for  $\text{C}_{33}\text{H}_{46}\text{N}_2\text{NaO}_6$  ( $[\text{M}+\text{Na}]^+$ ): 589.3356, found: 589.3357.

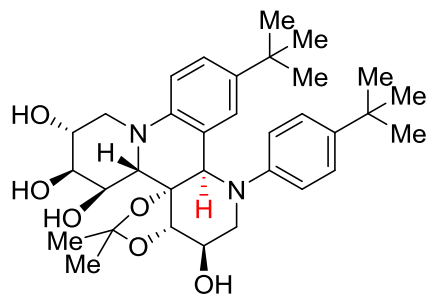

**(2*R*,3*S*,4*R*,4*aS*,4*bS*,7*aS*,8*R*,10*aR*)-12-(tert-butyl)-10-(4-(tert-butyl)phenyl)-6,6-dimethyl-2,3,4,4*a*,7*a*,8,10,10*a*-octahydro-1*H*,9*H*-benzo[*h*][1,3]dioxolo[4,5-*d*]pyrido[2,1-*f*][1,6]naphthyridine-2,3,4,8-tetraol (7*f*-1').** Yellow solid, yield 78%, m.p. 107.1 - 108.5 °C,  $[\alpha]_D^{25}$  -25.0 (*c* 0.1, CH<sub>3</sub>OH); <sup>1</sup>H NMR (400 MHz, CD<sub>3</sub>OD),  $\delta_H$  (ppm): 7.37 (d, *J* = 2.4 Hz, 1H), 7.17 (dd, *J* = 8.4, 2.4 Hz, 1H), 7.14 – 7.12 (m, 2H), 6.87 (d, *J* = 8.8 Hz, 1H), 6.64 – 6.62 (m, 2H), 4.86 (s, 1H), 4.84 (s, 1H), 4.37 (dd, *J* = 7.6, 3.2 Hz, 1H), 4.01 – 3.95 (m, 2H), 3.89 (ddd, *J* = 7.2, 5.2, 3.6 Hz, 1H), 3.55 (dd, *J* = 13.6, 4.4 Hz, 2H), 3.48 – 3.42 (m, 1H), 3.23 – 3.20 (m, 1H), 3.10 (d, *J* = 7.6 Hz, 1H), 1.62 (s, 3H), 1.57 (s, 3H), 1.23 (s, 18H). <sup>13</sup>C NMR (100 MHz, CD<sub>3</sub>OD),  $\delta_C$  (ppm): 147.2, 146.8, 143.6, 141.3, 131.0, 126.8, 126.5, 125.2, 123.8, 115.7, 115.5, 114.4, 95.4, 87.8, 81.6, 79.0, 72.8, 70.9, 67.9, 61.5, 50.7, 4.19, 3.83, 34.6, 32.0, 32.0, 31.9, 28.4, 28.3. MS (ESI): Calculated for C<sub>33</sub>H<sub>46</sub>N<sub>2</sub>NaO<sub>6</sub> ([M+Na]<sup>+</sup>): 589.3356, found: 589.3356.

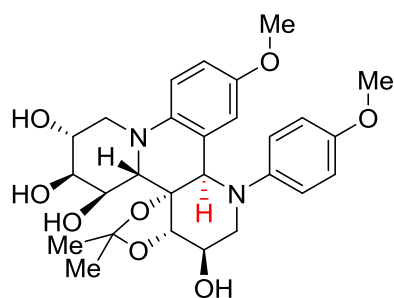

**(2*R*,3*S*,4*R*,4*aS*,4*bS*,7*aS*,8*R*,10*aR*)-12-methoxy-10-(4-methoxyphenyl)-6,6-dimethyl-2,3,4,4*a*,7*a*,8,10,10*a*-octahydro-1*H*,9*H*-benzo[*h*][1,3]dioxolo[4,5-*d*]pyrido[2,1-*f*][1,6]naphthyridine-2,3,4,8-tetraol (7*h*-1').** Yellow solid, yield 68%, m.p. 94.1 - 95.5 °C,  $[\alpha]_D^{25}$  -22.0 (*c* 0.1, CH<sub>3</sub>OH); <sup>1</sup>H NMR (400 MHz, CD<sub>3</sub>OD),  $\delta_H$  (ppm): 6.96 (d, *J* = 2.8 Hz, 1H), 6.90 (d, *J* = 8.8 Hz, 1H), 6.76 – 6.69 (m, 5H), 4.82 (s, 1H), 4.76 (d, *J* = 3.2 Hz, 1H), 4.36 (dd, *J* = 6.4, 2.8 Hz, 1H), 4.02 – 3.94 (m, 2H), 3.88 (t, *J* = 2.4 Hz, 1H), 3.69 (d, *J* = 2.0 Hz, 6H), 3.48 (dd, *J* = 13.2, 4.4 Hz, 1H), 3.42 (dd, *J* = 13.6, 7.2

Hz, 1H), 3.36 (dd,  $J = 12.4, 4.0$  Hz, 1H), 3.17 (dd,  $J = 12.4, 3.2$  Hz, 1H), 3.00 (d,  $J = 6.4$  Hz, 1H), 1.61 (s, 3H), 1.56 (s, 3H).  $^{13}\text{C}$  NMR (100 MHz,  $\text{CD}_3\text{OD}$ ),  $\delta_{\text{C}}$  (ppm): 155.6, 154.0, 143.7, 143.2, 127.1, 118.3, 116.4, 115.9, 115.7, 115.6, 112.6, 96.0, 88.1, 82.2, 79.6, 72.9, 70.7, 68.2, 62.7, 56.1, 56.1, 56.0, 52.1, 45.4, 28.3, 28.2. MS (ESI): Calculated for  $\text{C}_{27}\text{H}_{34}\text{N}_2\text{K}\text{O}_8$  ( $[\text{M}+\text{K}]^+$ ): 553.2315, found: 553.2315.

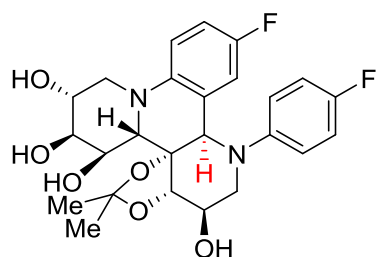

**(2R,3S,4R,4aS,4bS,7aS,8R,10aR)-12-fluoro-10-(4-fluorophenyl)-6,6-dimethyl-2,3,4,4a,7a,8,10,10a-octahydro-1H,9H-benzo[*h*][1,3]dioxolo[4,5-*d*]pyrido[2,1-*f*][1,6]naphthyridine-2,3,4,8-tetraol (7l-1<sup>o</sup>)**. Yellow solid, yield 58%, m.p. 87.6 - 89.5 °C,  $[\alpha]_{\text{D}}^{25}$  -33.0 ( $c$  0.1,  $\text{CH}_3\text{OH}$ );  $^1\text{H}$  NMR (400 MHz,  $\text{CD}_3\text{OD}$ ),  $\delta_{\text{H}}$  (ppm): 7.12 (dd,  $J = 9.2, 2.8$  Hz, 1H), 6.94 (dd,  $J = 9.2, 4.8$  Hz, 1H), 6.90 (dd,  $J = 8.0, 2.8$  Hz, 1H), 6.85 (t,  $J = 8.8$  Hz, 2H), 6.69 – 6.66(m, 2H), 4.82 – 4.80 (m, 2H), 4.38 (dd,  $J = 7.2, 2.8$  Hz, 1H), 3.99 (ddd,  $J = 16.4, 5.2, 2.4$  Hz, 2.0H), 3.85 (ddd,  $J = 8.0, 5.6, 2.8$  Hz, 1H), 3.52 – 3.39 (m, 3H), 3.21 (dd,  $J = 12.8, 3.2$  Hz, 1H), 3.05 (d,  $J = 7.2$  Hz, 1H), 1.61 (s, 3H), 1.57 (s, 3H).  $^{13}\text{C}$  NMR (100 MHz,  $\text{CD}_3\text{OD}$ ),  $\delta_{\text{C}}$  (ppm): 159.9, 158.4, 157.5, 156.10, 146.4, 145.8, 127.3, 117.6(2C), 116.4(2C), 116.0(3C), 115.5(2C), 114.3(2C), 96.0, 88.0, 81.9, 79.8, 72.8, 70.8, 67.9, 62.3, 51.3, 44.7, 28.3. MS (ESI): Calculated for  $\text{C}_{25}\text{H}_{28}\text{F}_2\text{N}_2\text{Na}\text{O}_6$  ( $[\text{M}+\text{Na}]^+$ ):513.1915, found: 513.1914.

|                                                            |       |
|------------------------------------------------------------|-------|
| Fig S1:NMR spectra of the newly synthesized compounds..... | 30-73 |
| Fig S2:2D NMR analysis spectra.....                        | 74-87 |
| Fig S3 and S4: Key HMBC and ROESY correlations.....        | 88    |
| Fig S5:High resolution mass spectra .....                  | 89-91 |
| Fig S6: Crystal Information.....                           | 92-93 |

**Fig S1: NMR spectra of the newly synthesized compounds**

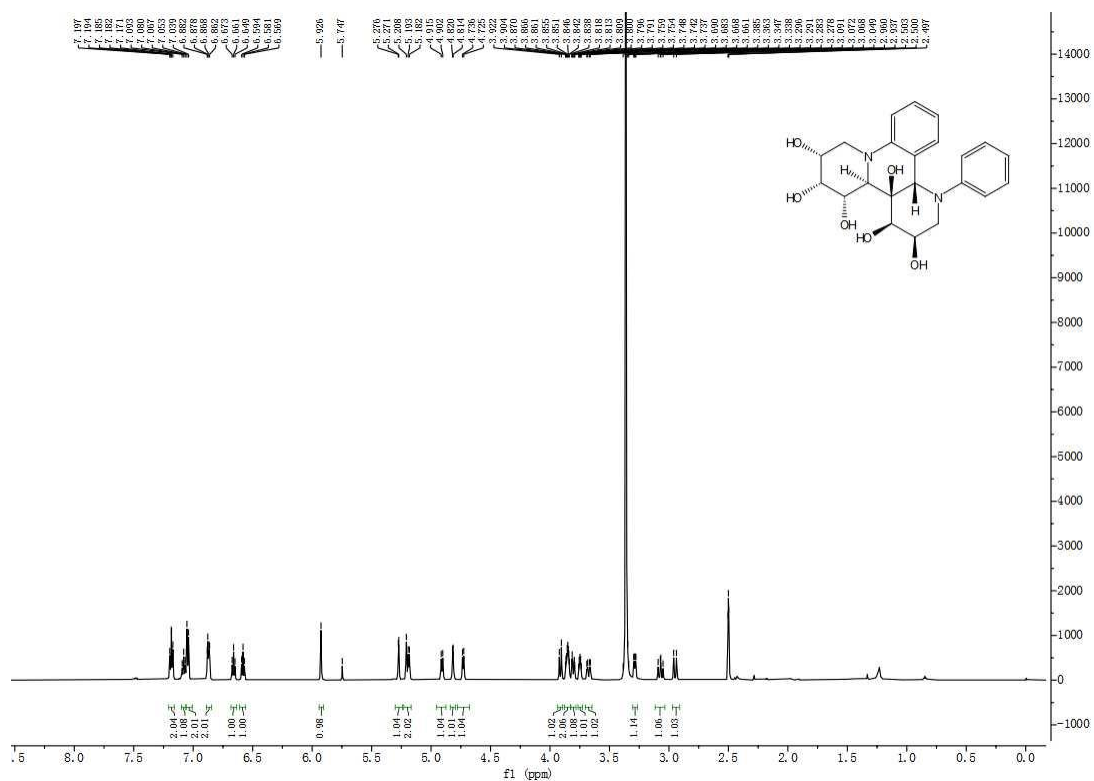

**Fig1. <sup>1</sup>H NMR of compound 5a**

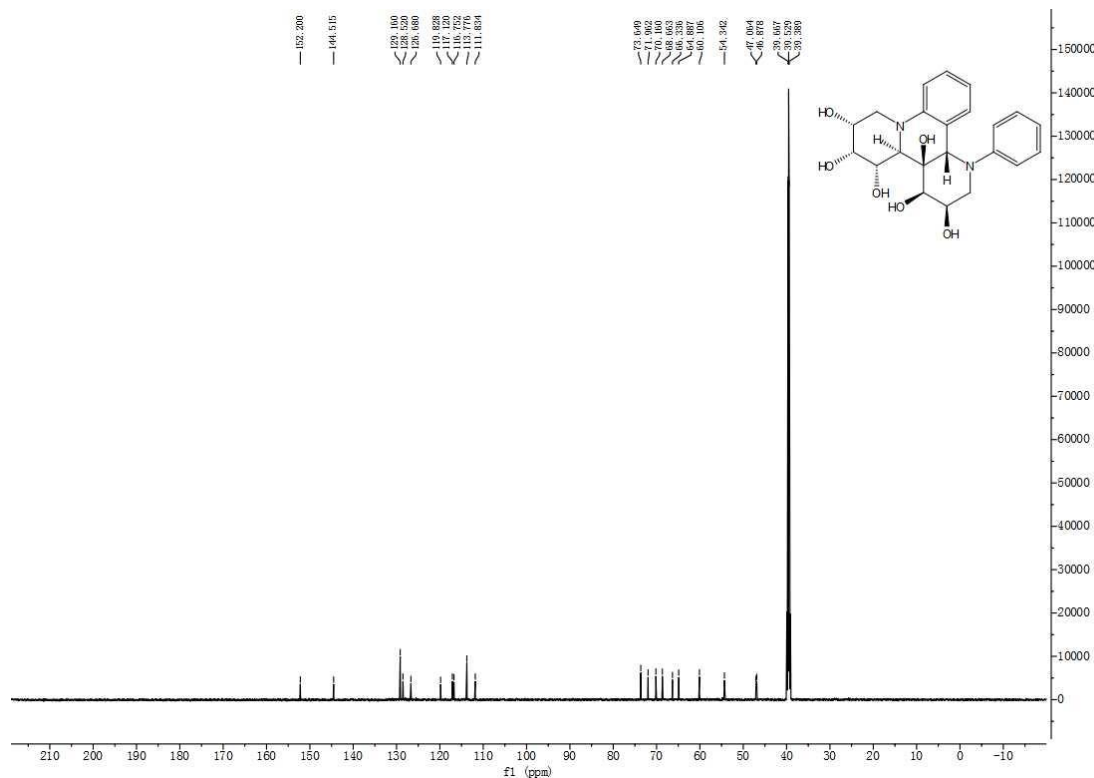

**Fig.2 <sup>13</sup>C NMR of compound 5a**

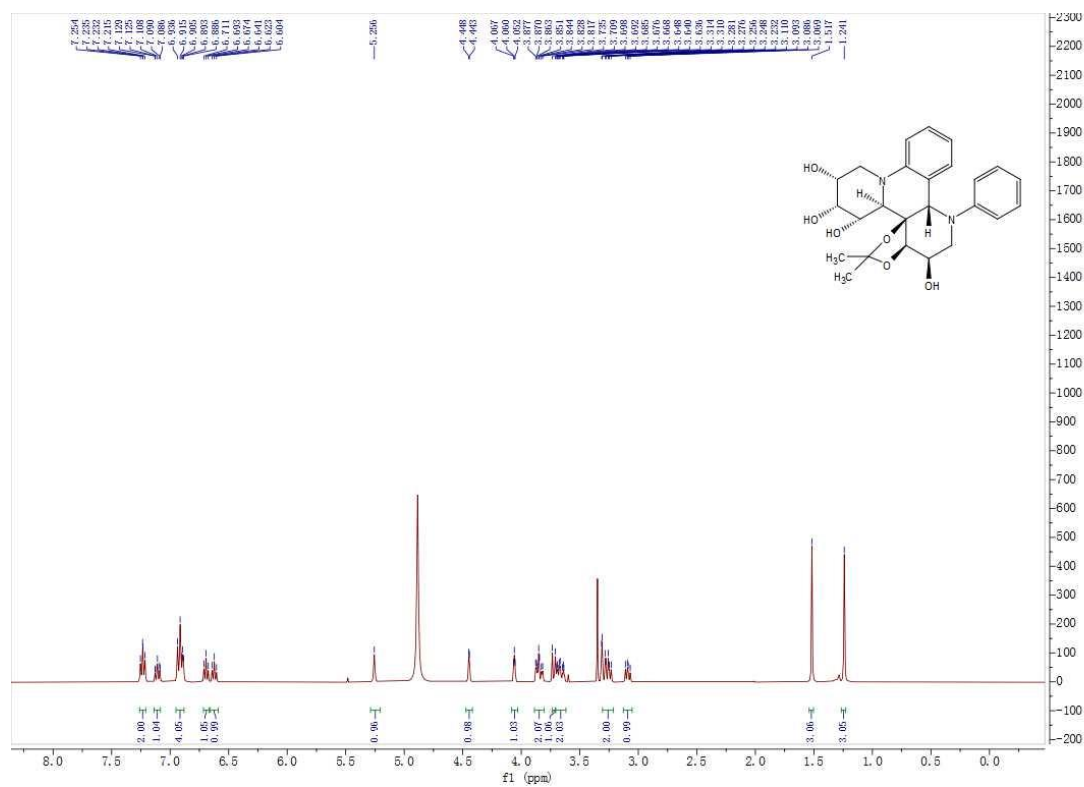

Fig.3 <sup>1</sup>H NMR of compound 5a'

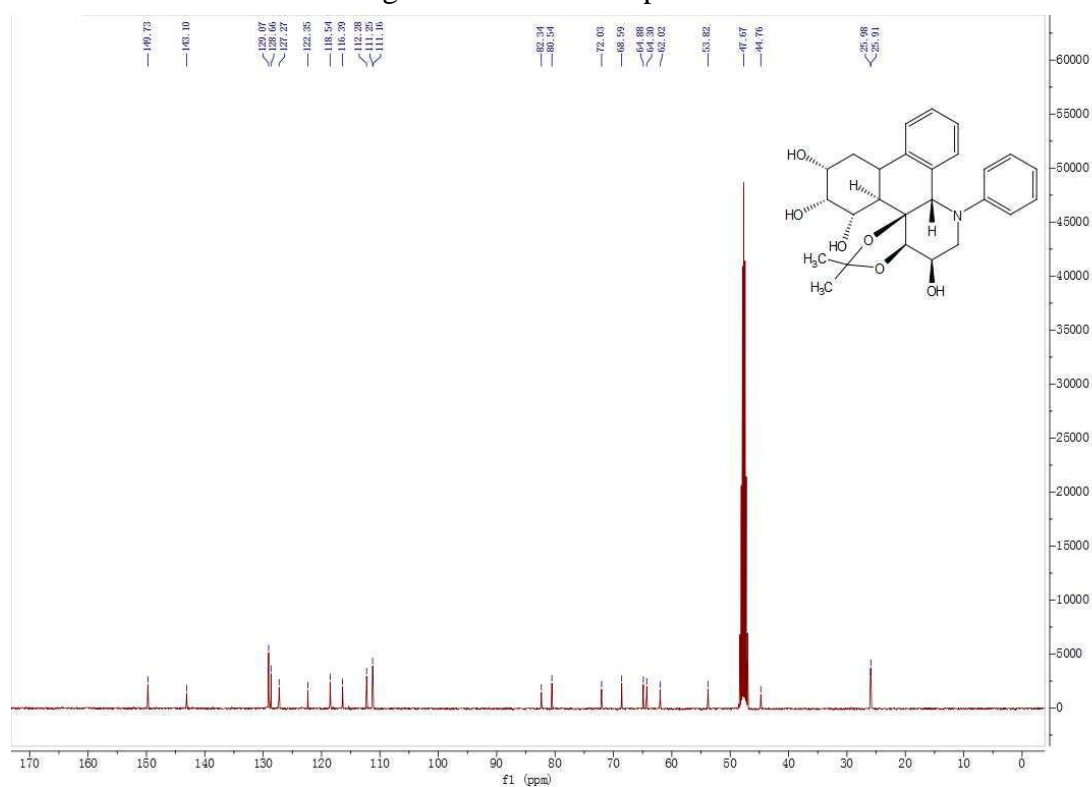

Fig.4 <sup>13</sup>C NMR of compound 5a'

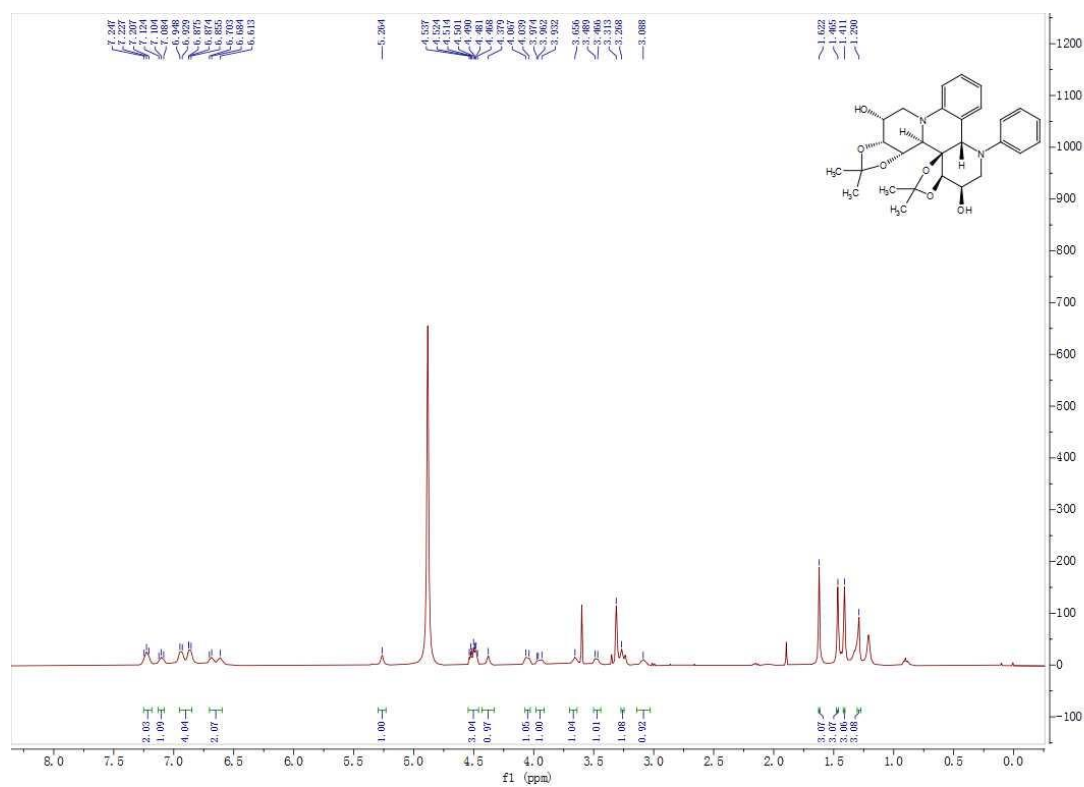

Fig.5 <sup>1</sup>H NMR of compound 5a''

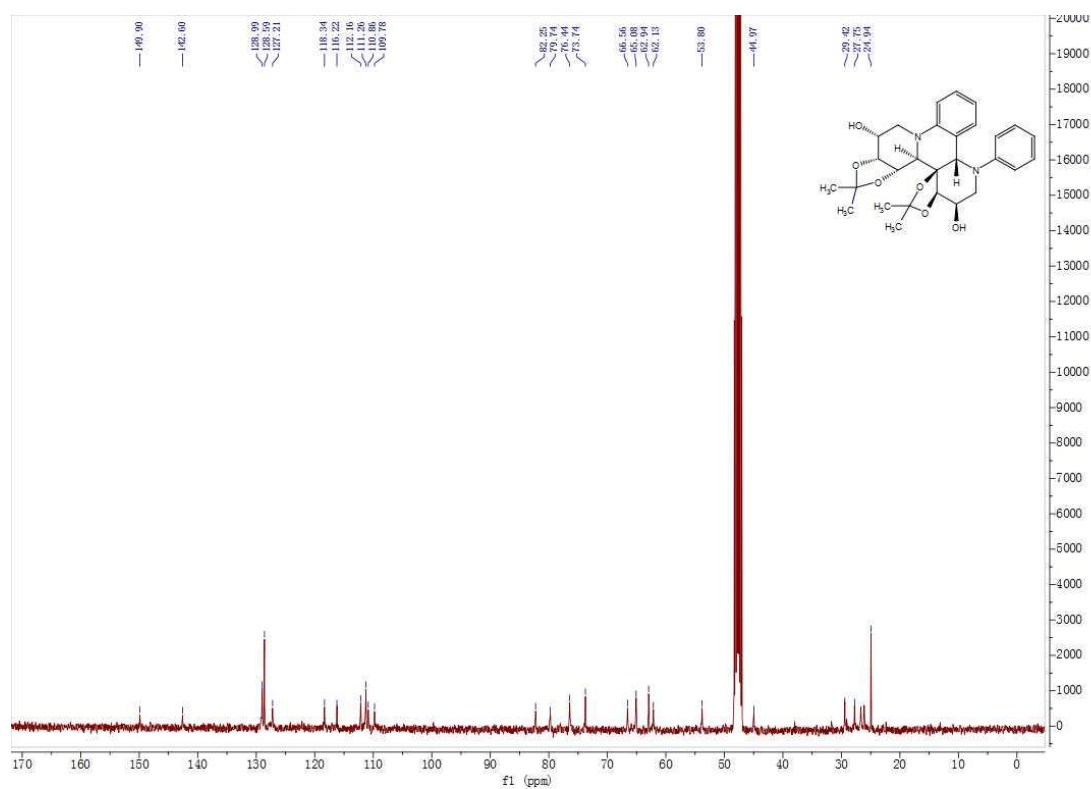

Fig.6 <sup>13</sup>C NMR of compound 5a''



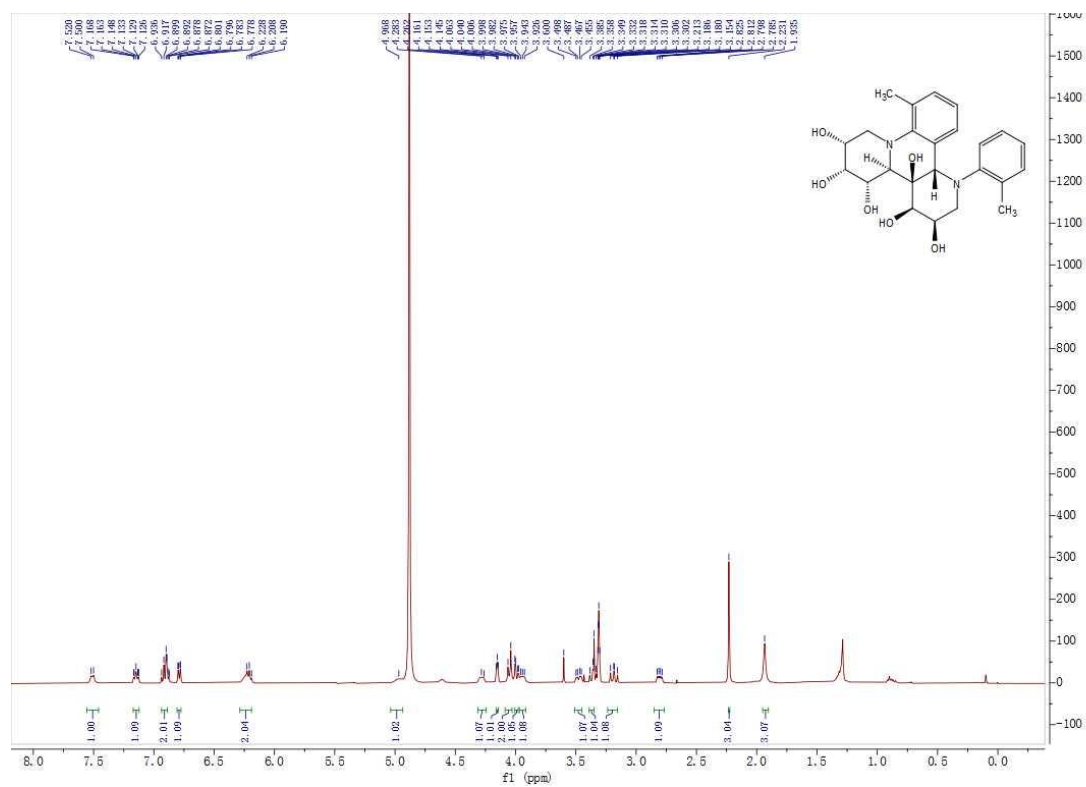

Fig.7  $^1\text{H}$  NMR of compound **5b**

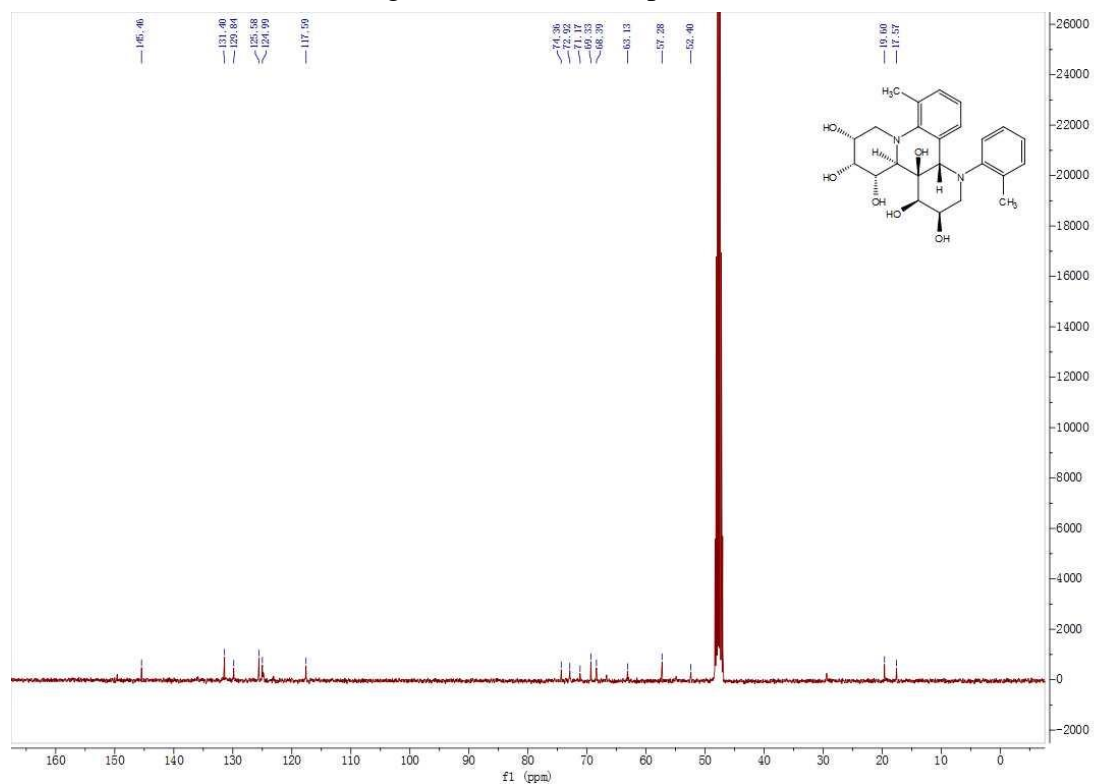

Fig.8  $^{13}\text{C}$  NMR of compound **5b**

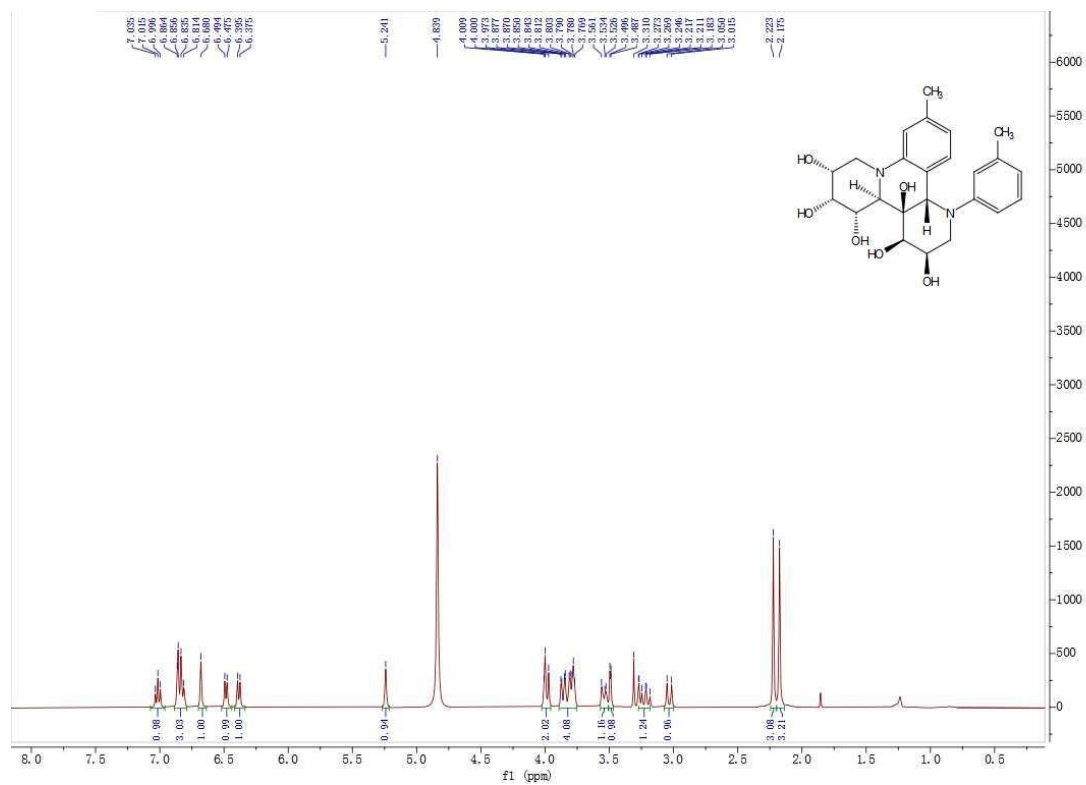

Fig.9  $^1\text{H}$  NMR of compound 5c

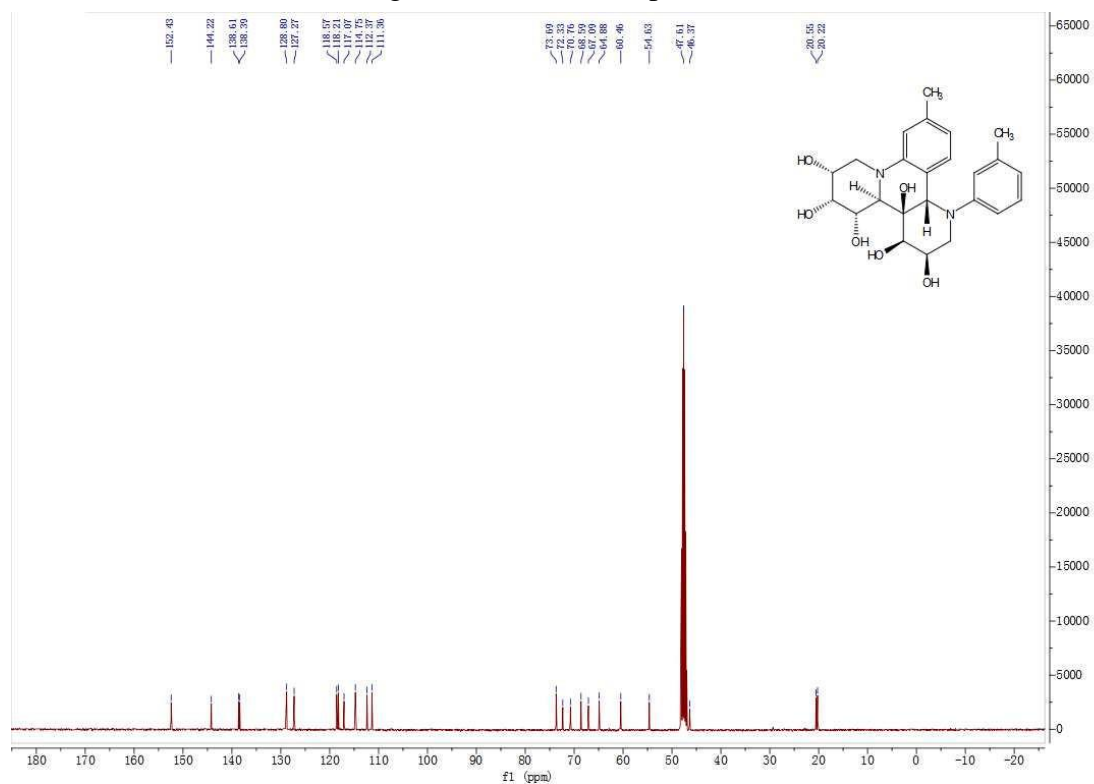

Fig.10  $^{13}\text{C}$  NMR of compound 5c

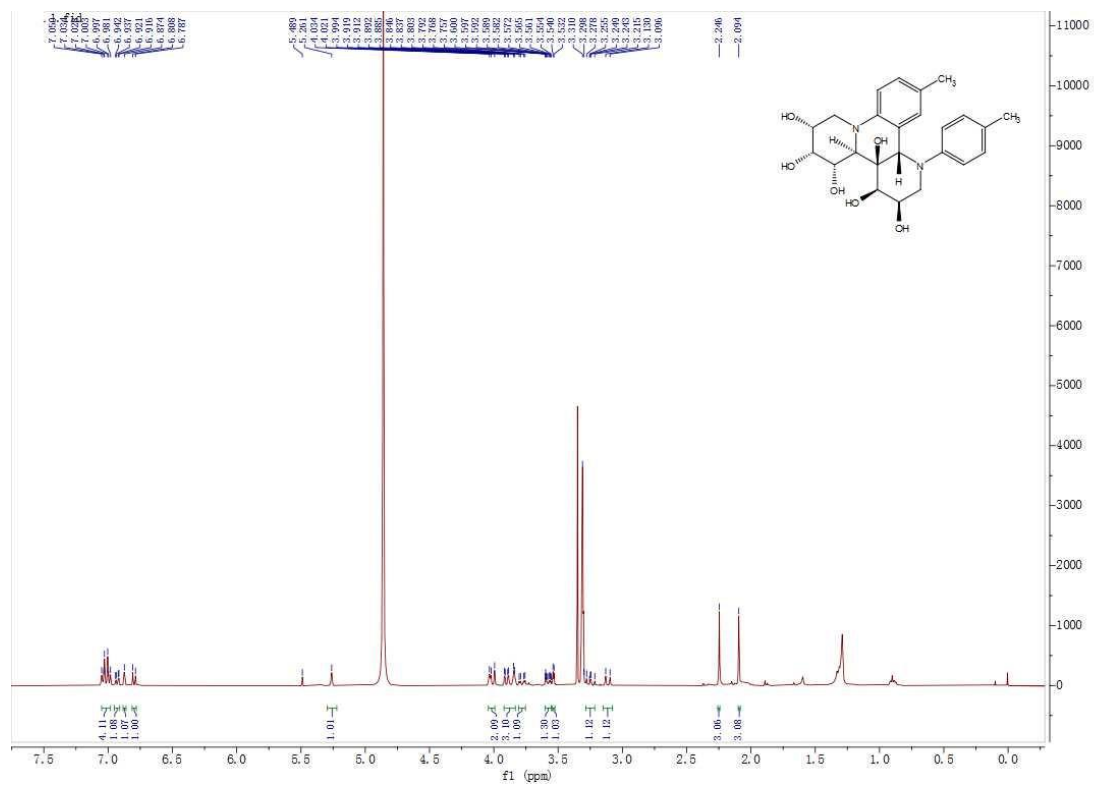

Fig.11  $^1\text{H}$  NMR of compound 5d

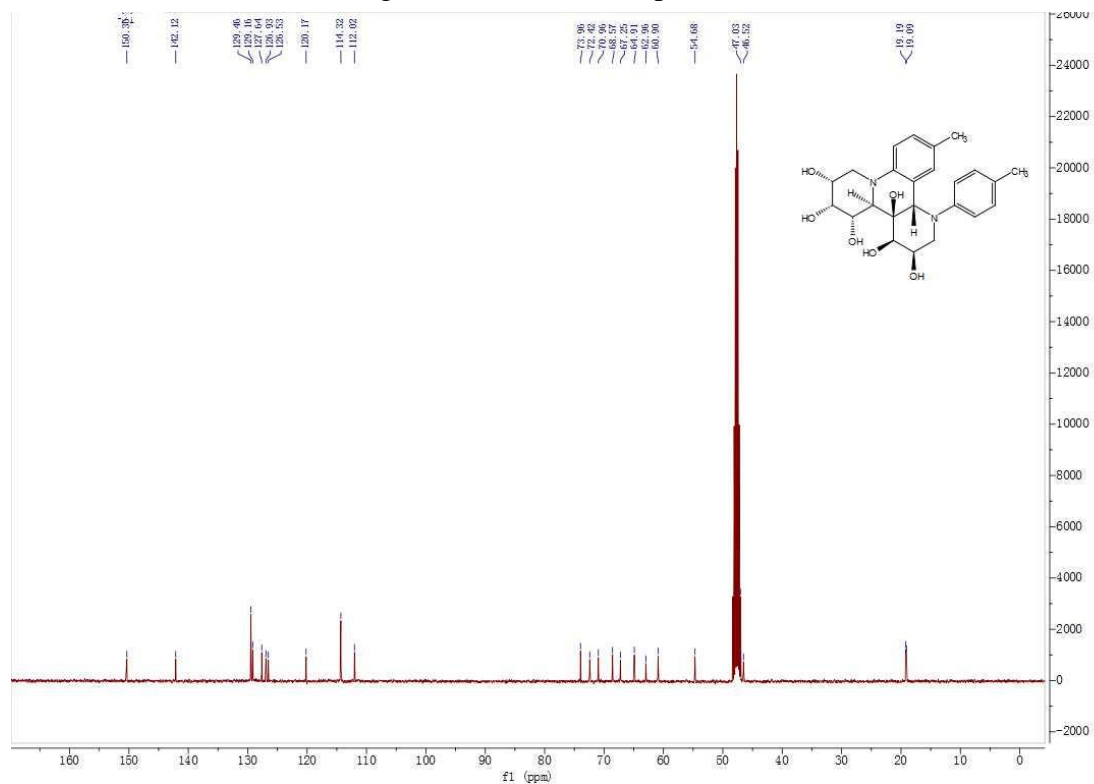

Fig.12  $^{13}\text{C}$  NMR of compound 5d

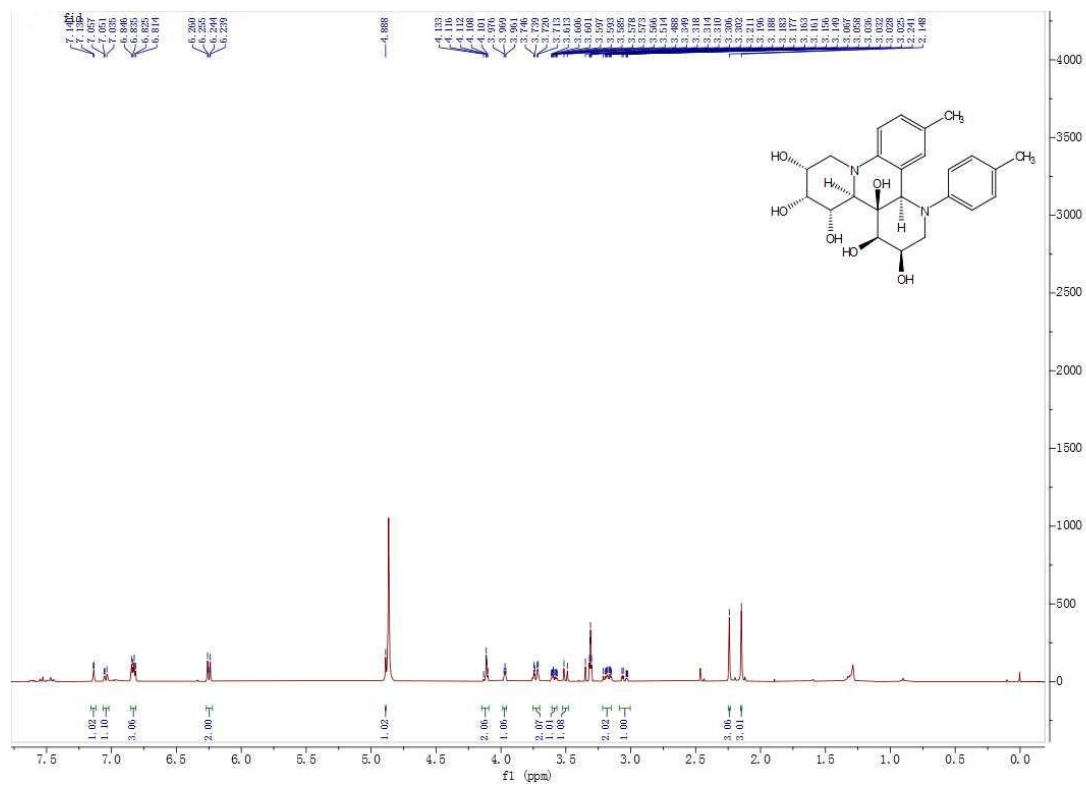

Fig.13  $^1\text{H}$  NMR of compound 5d-1

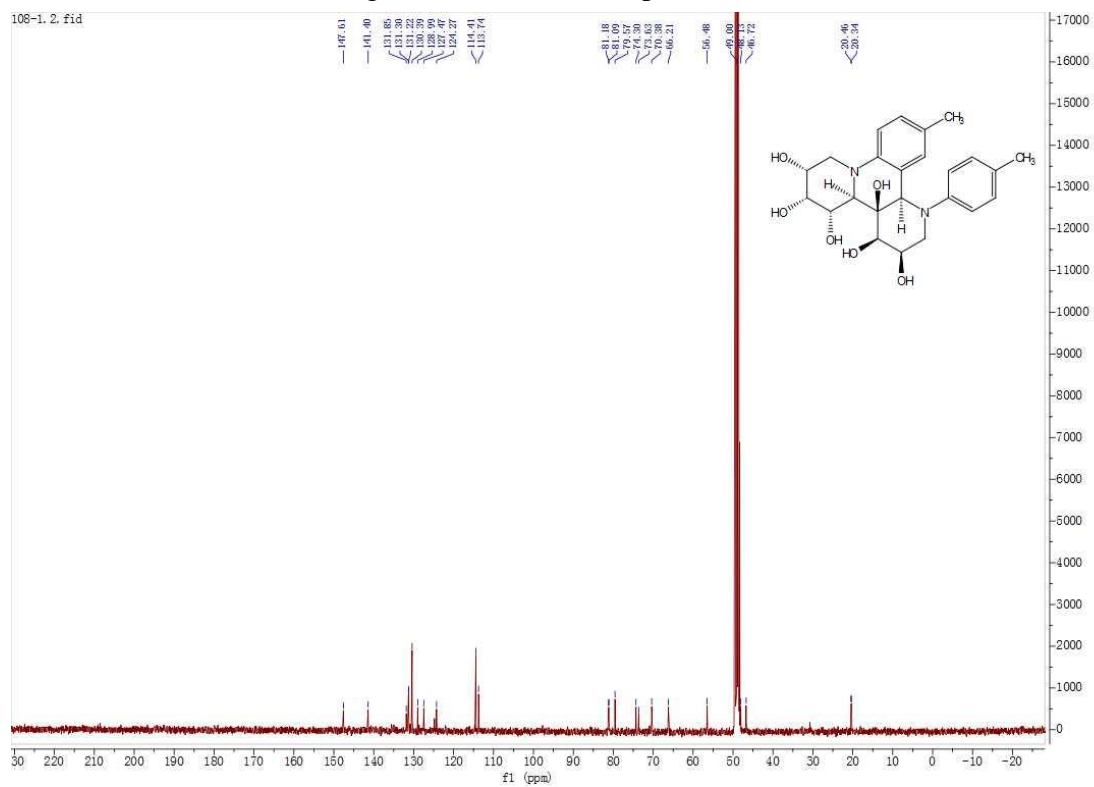

Fig.14  $^{13}\text{C}$  NMR of compound 5d-1

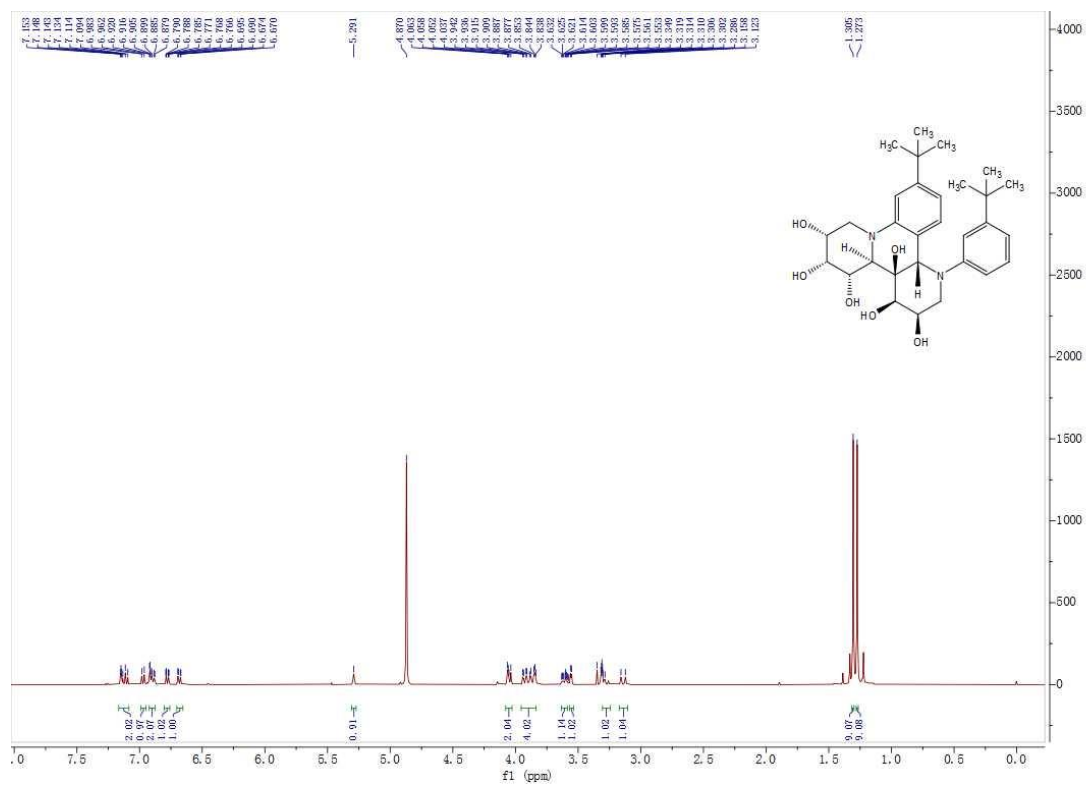

Fig.15 <sup>1</sup>H NMR of compound **5e**

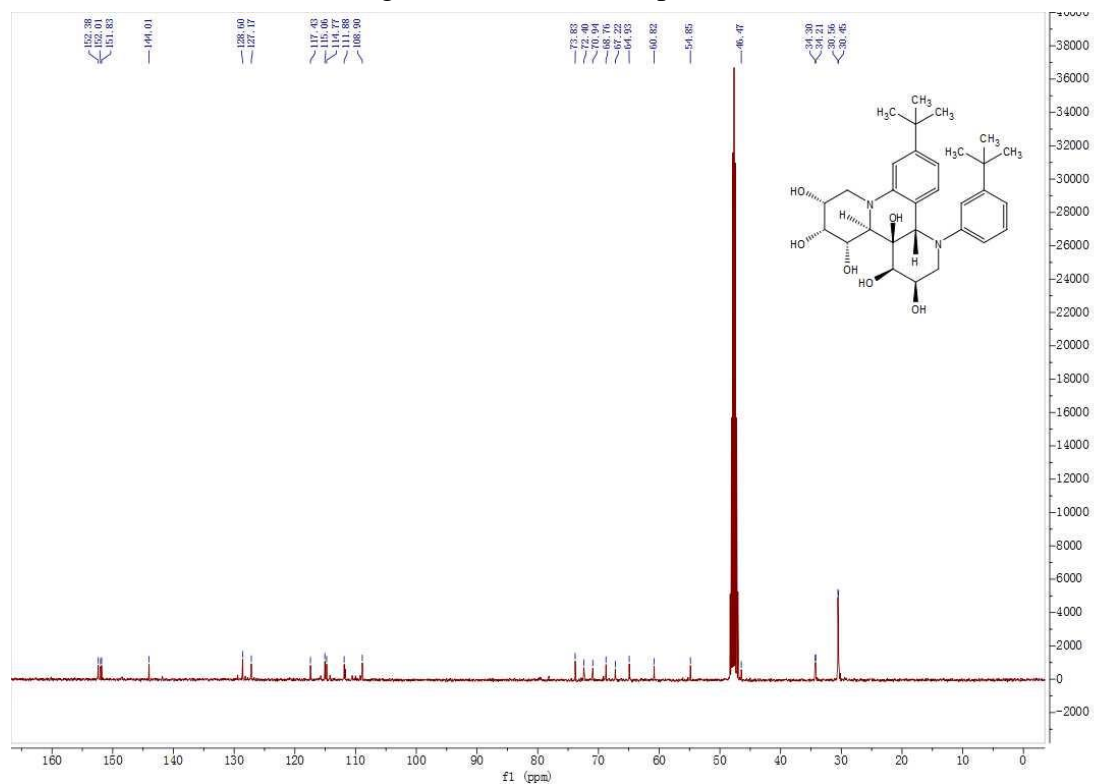

Fig.16 <sup>13</sup>C NMR of compound **5e**

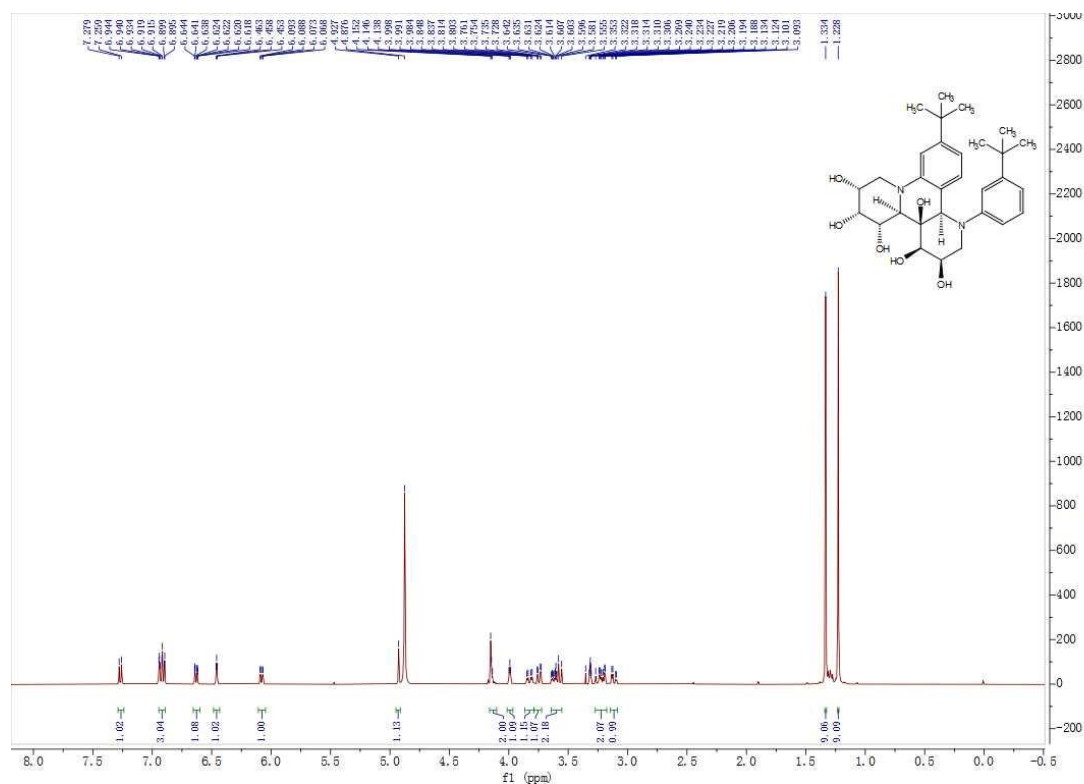

Fig.17  $^1\text{H}$  NMR of compound 5e-1

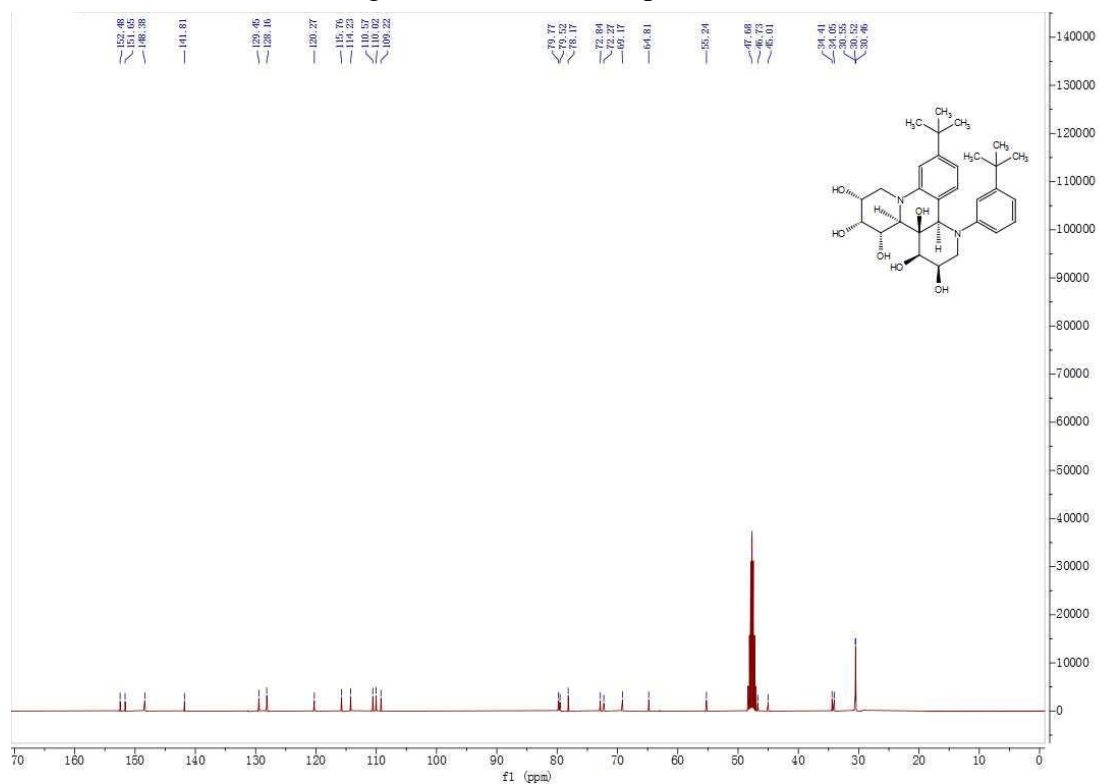

Fig.18  $^{13}\text{C}$  NMR of compound 5e-1

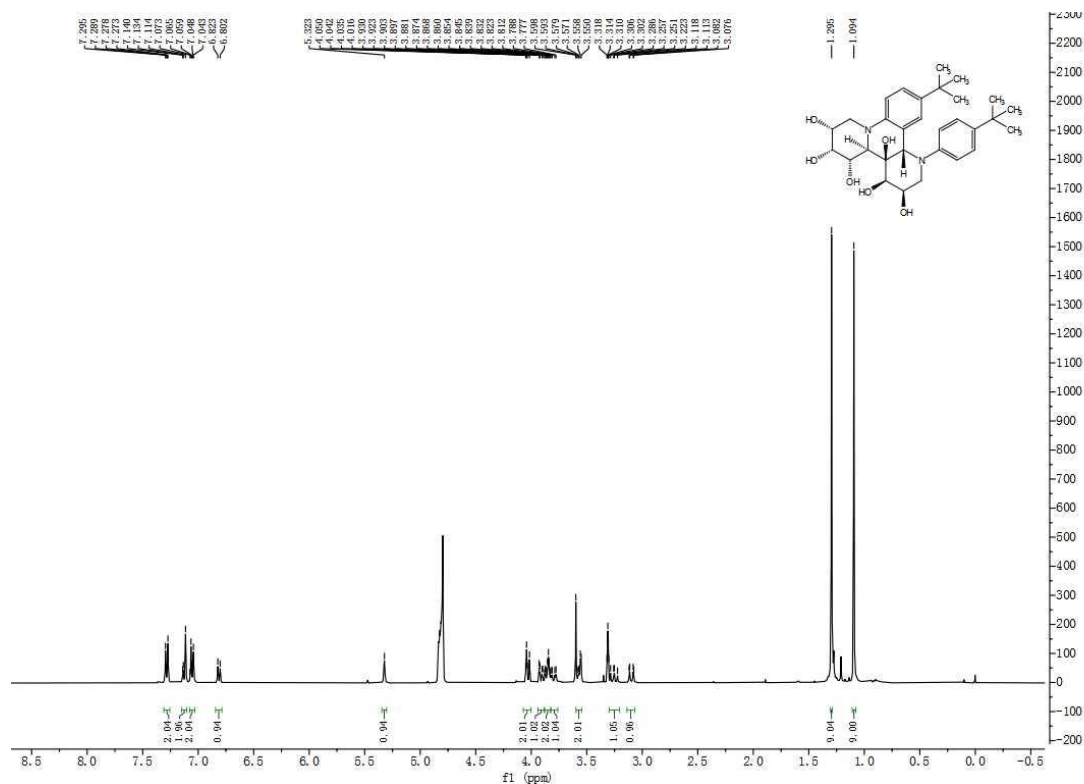

Fig.19  $^1\text{H NMR}$  of compound **5f**

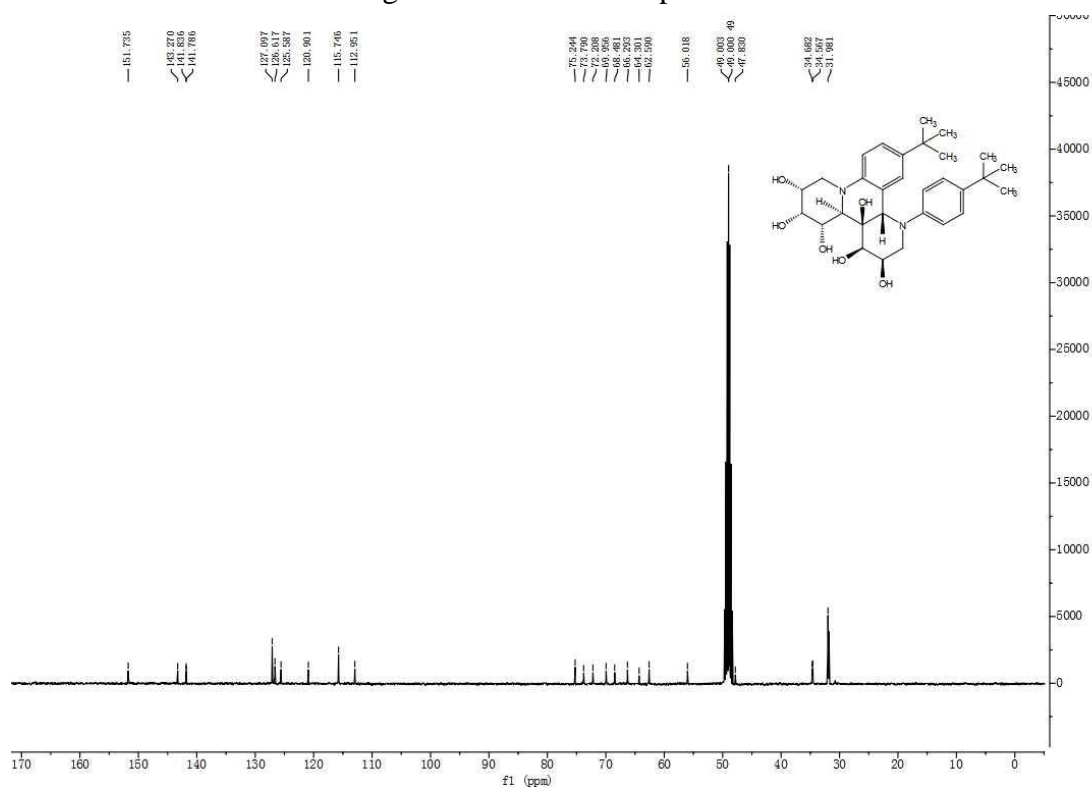

Fig.20  $^{13}\text{C NMR}$  of compound **5f**

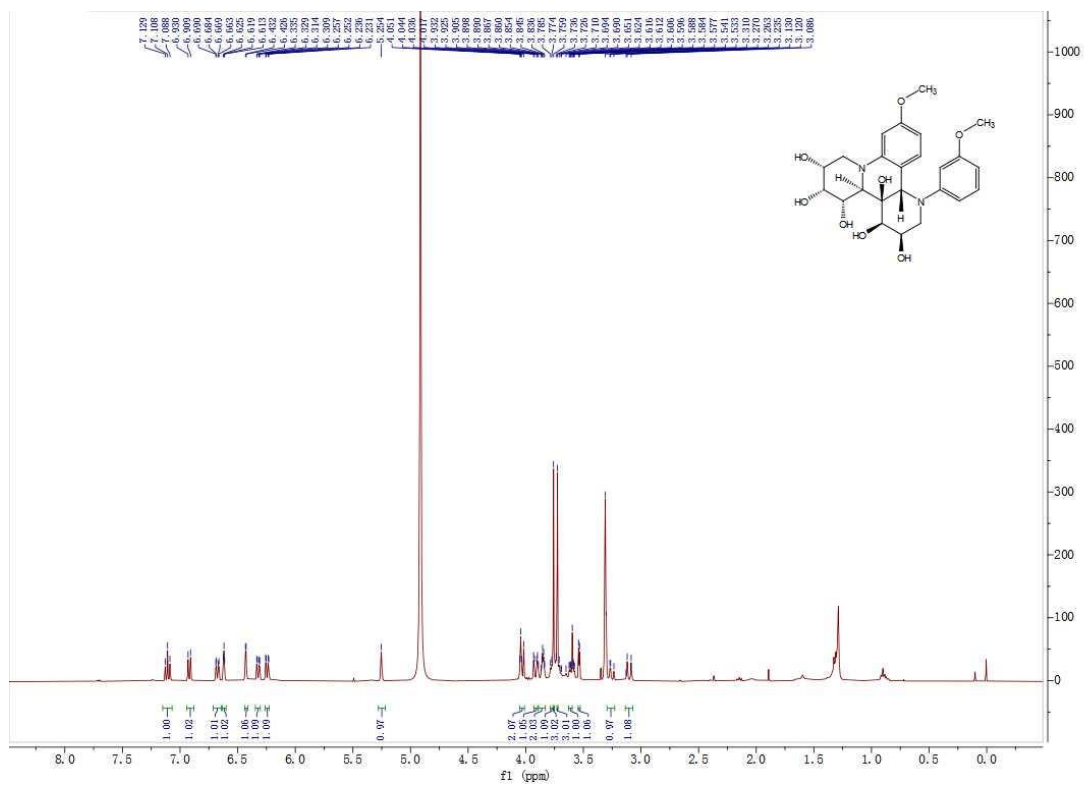

Fig.21  $^1\text{H}$  NMR of compound 5g

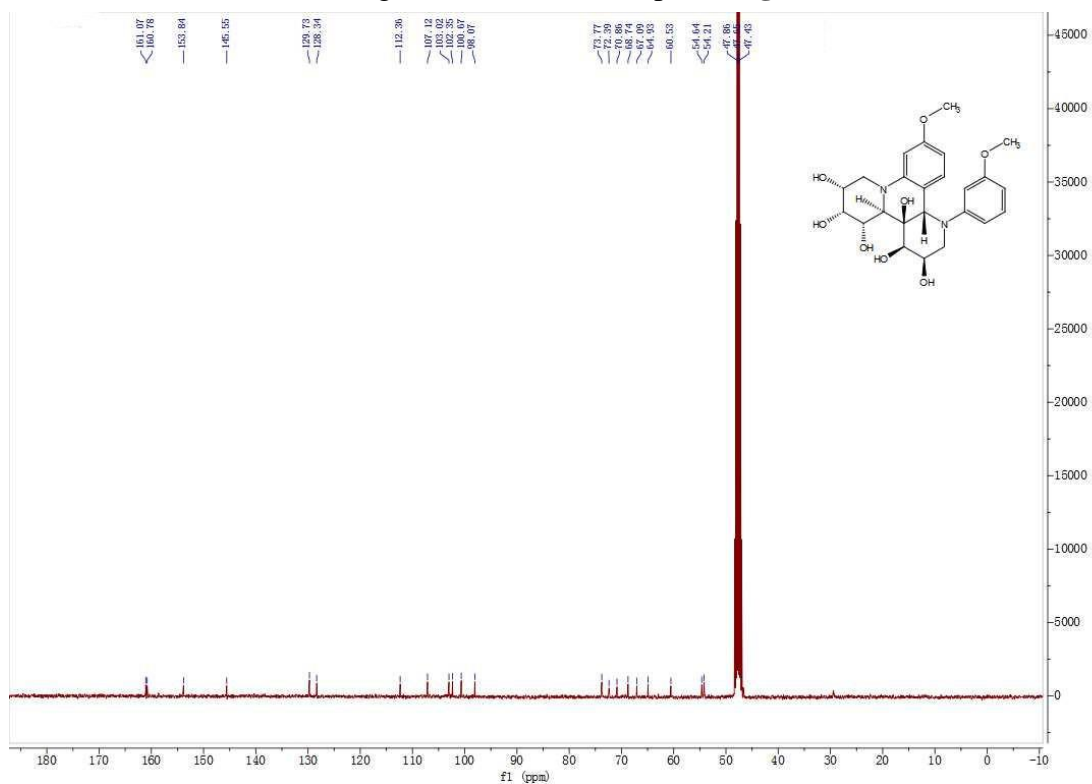

Fig.22  $^{13}\text{C}$  NMR of compound 5g



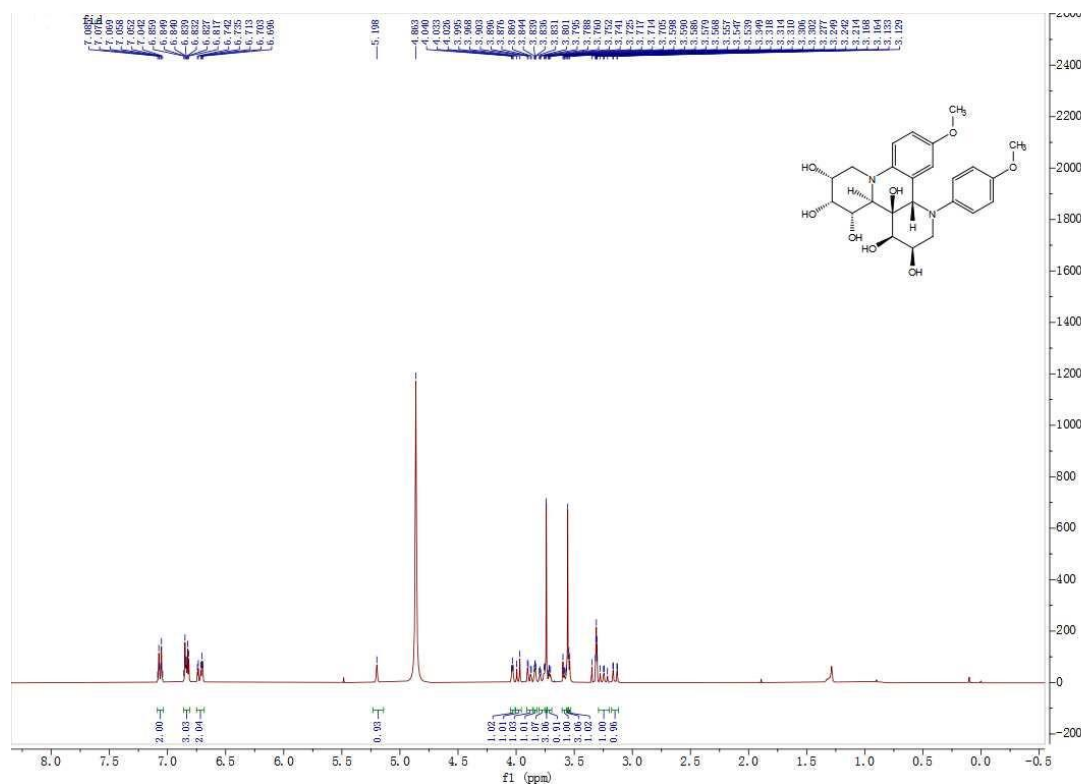

Fig.23  $^1\text{H}$  NMR of compound 5h

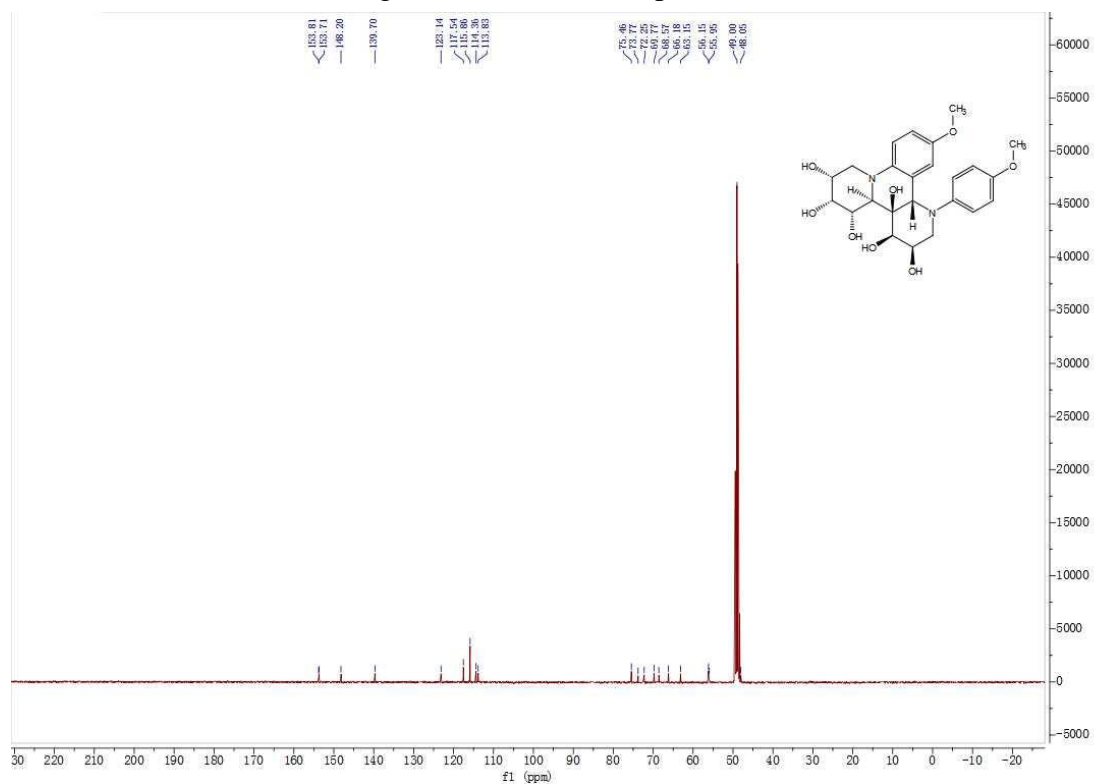

Fig.24  $^{13}\text{C}$  NMR of compound 5h

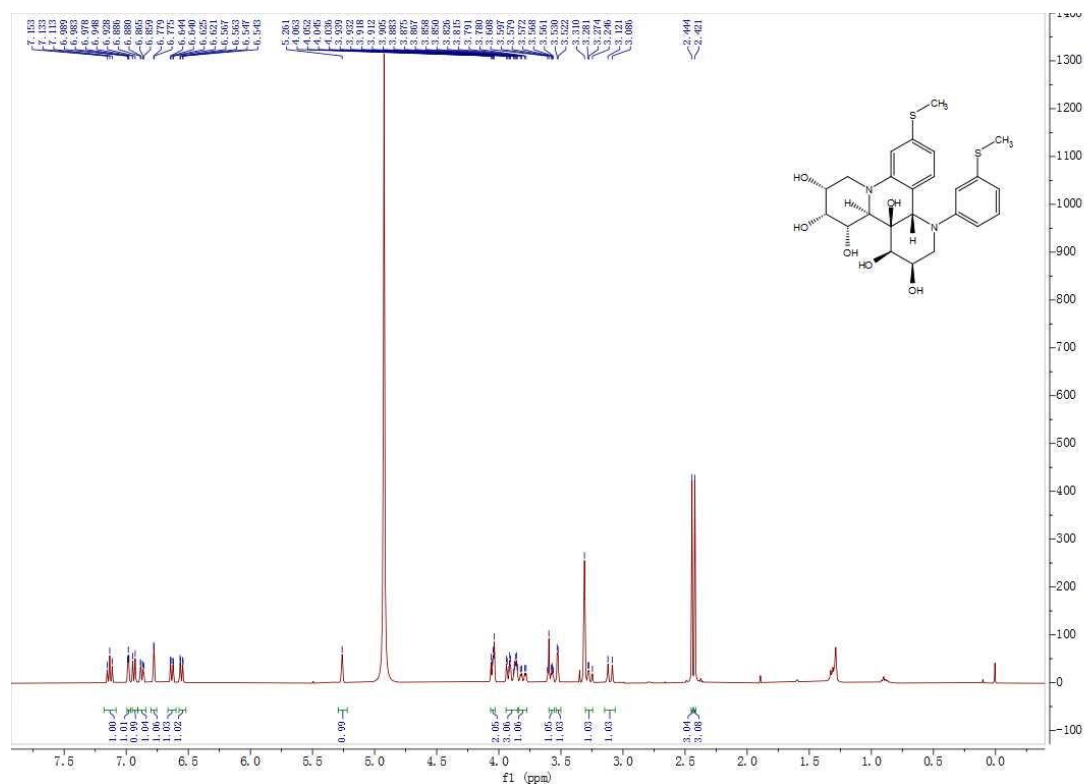

Fig.25  $^1\text{H}$  NMR of compound **5i**

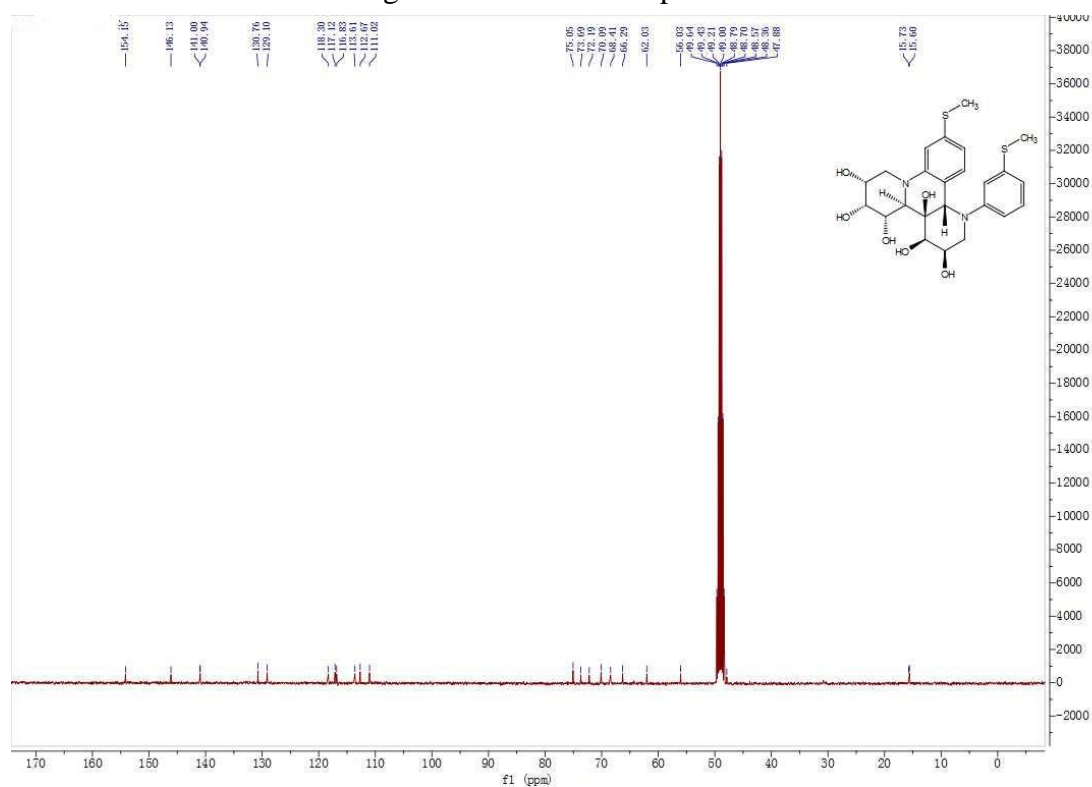

Fig.26  $^{13}\text{C}$  NMR of compound **5i**

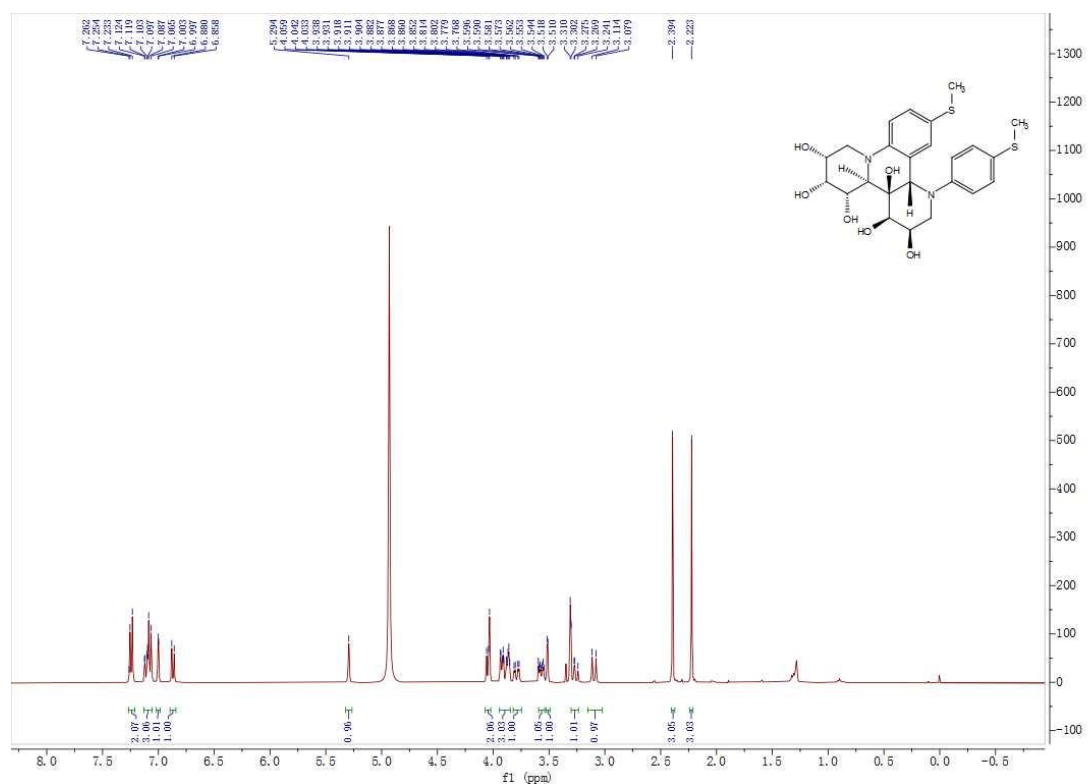

Fig.27  $^1\text{H NMR}$  of compound **5j**

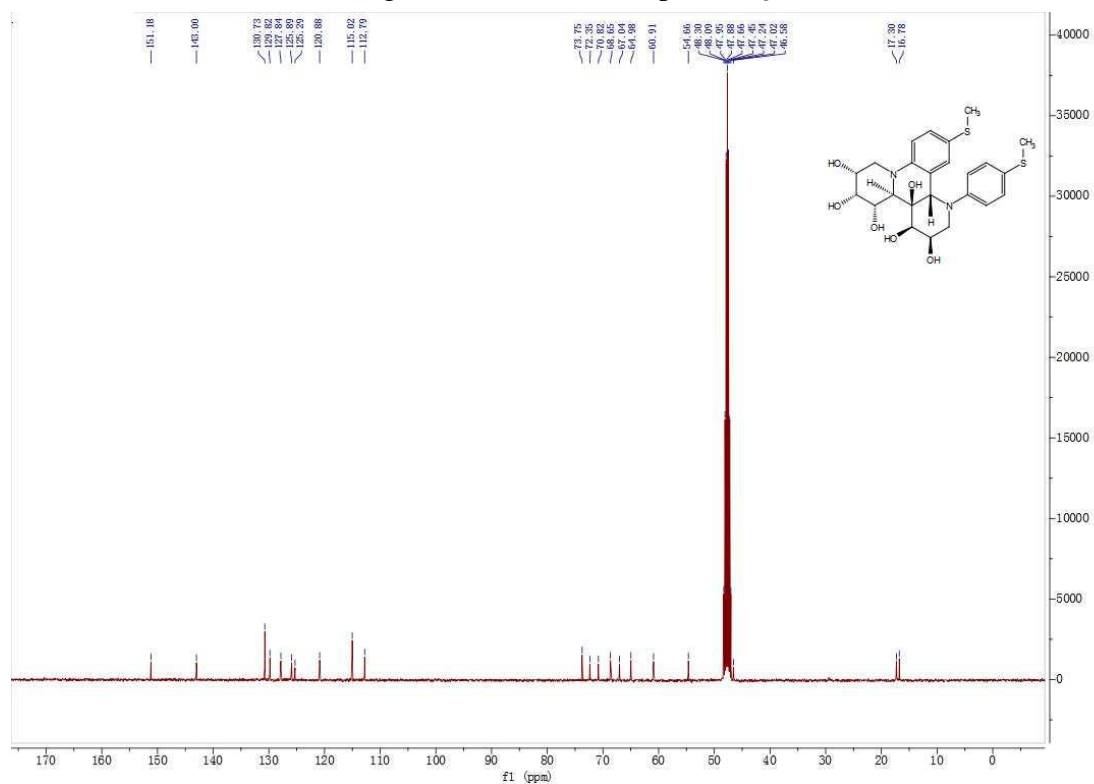

Fig.28  $^{13}\text{C NMR}$  of compound **5j**

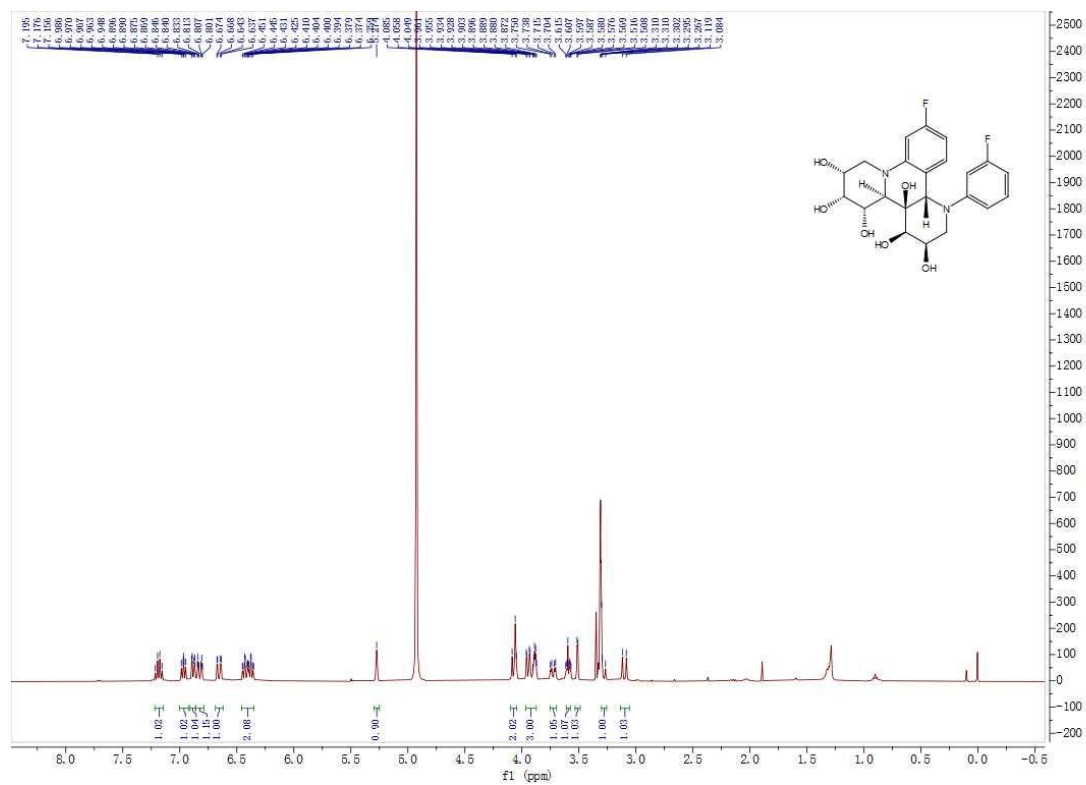

Fig.29  $^1\text{H}$  NMR of compound **5k**

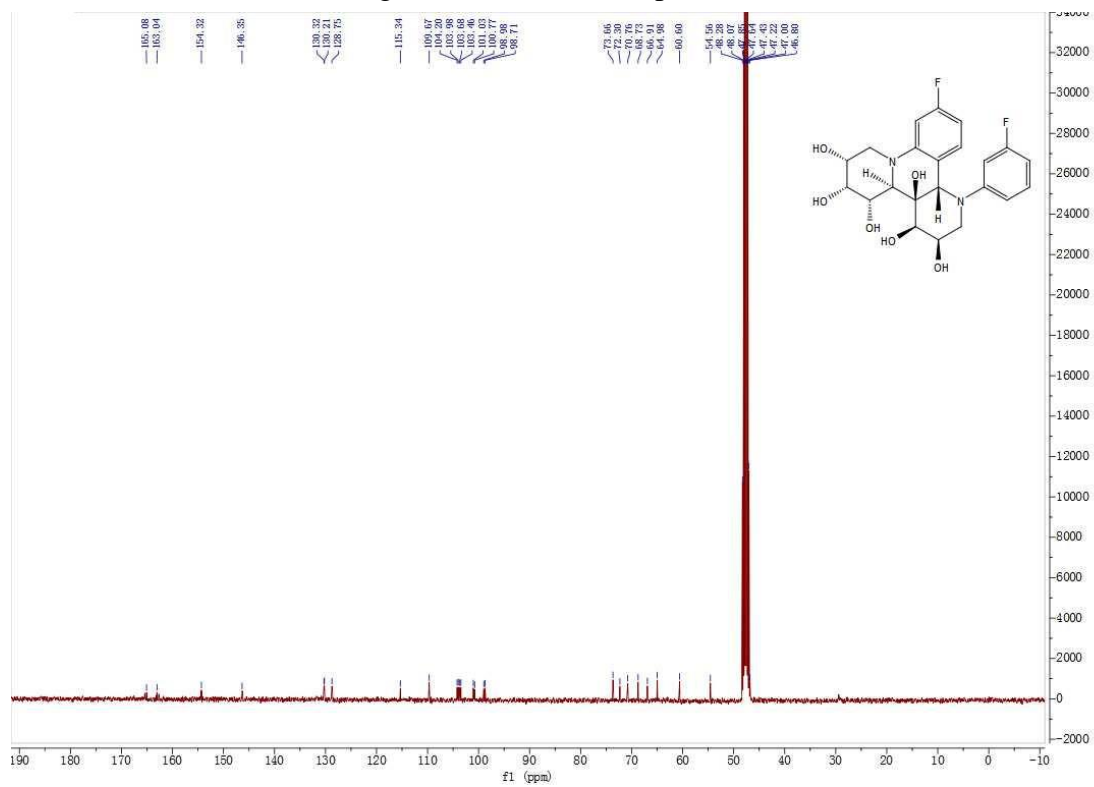

Fig.30  $^{13}\text{C}$  NMR of compound **5k**

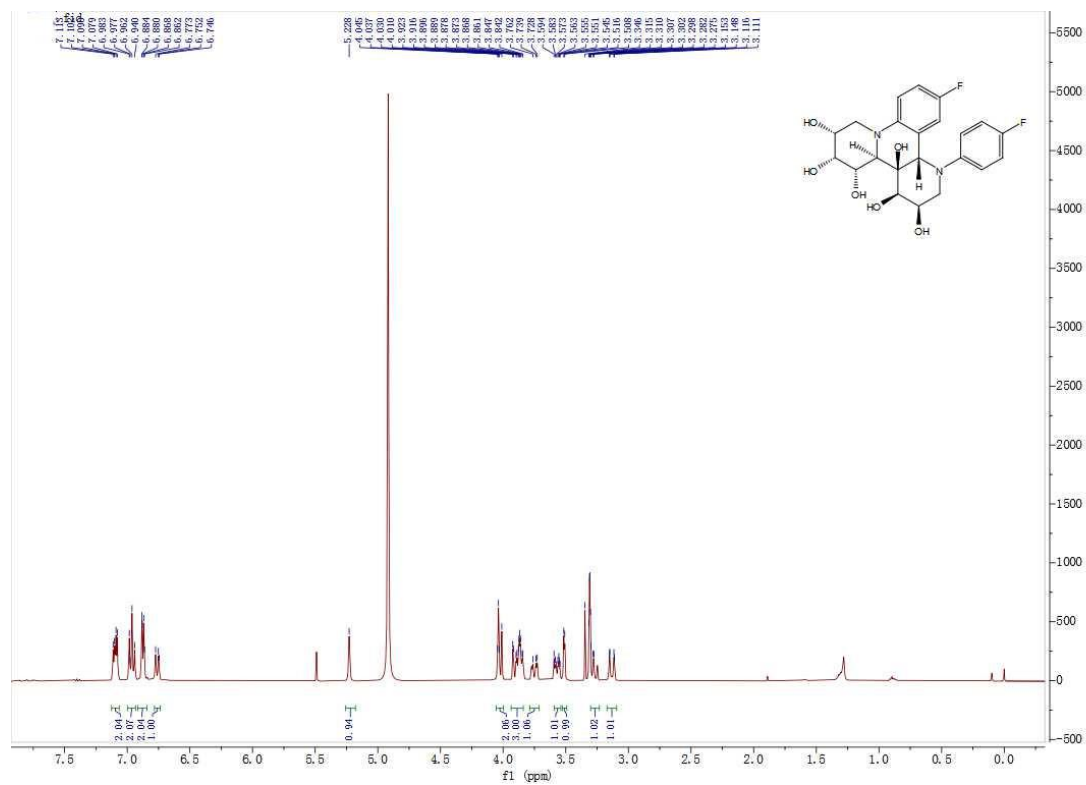

Fig.31  $^1\text{H}$  NMR of compound 51

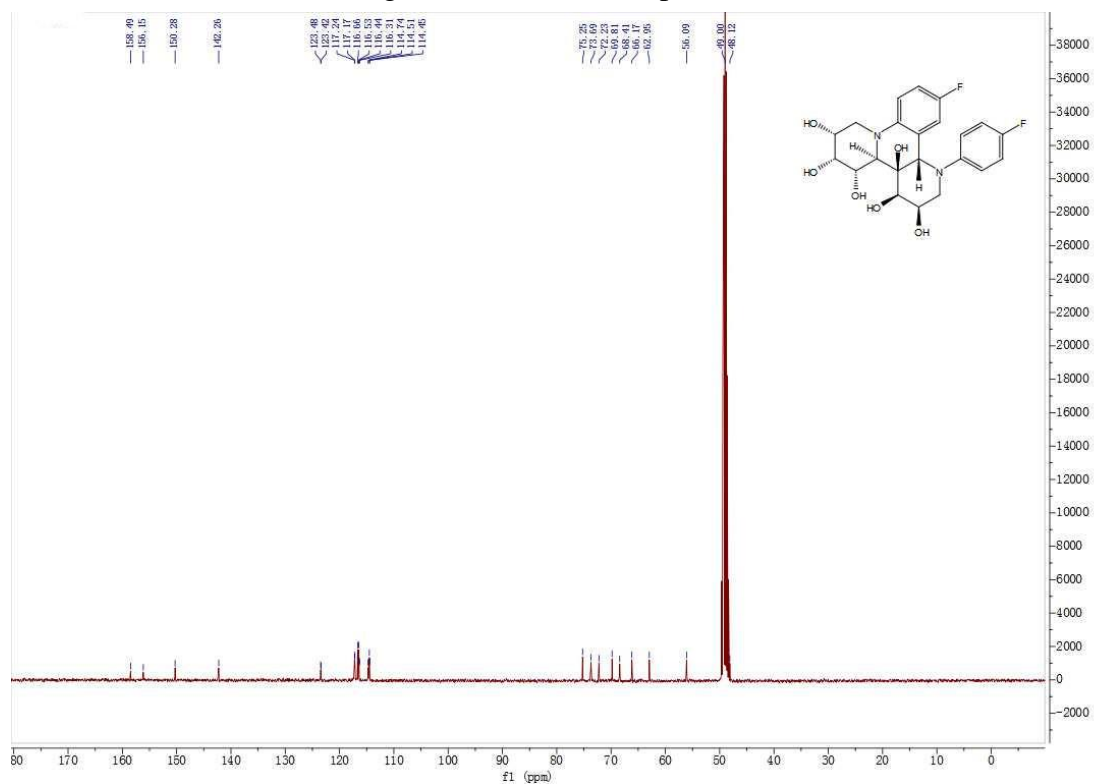

Fig.32  $^{13}\text{C}$  NMR of compound 51

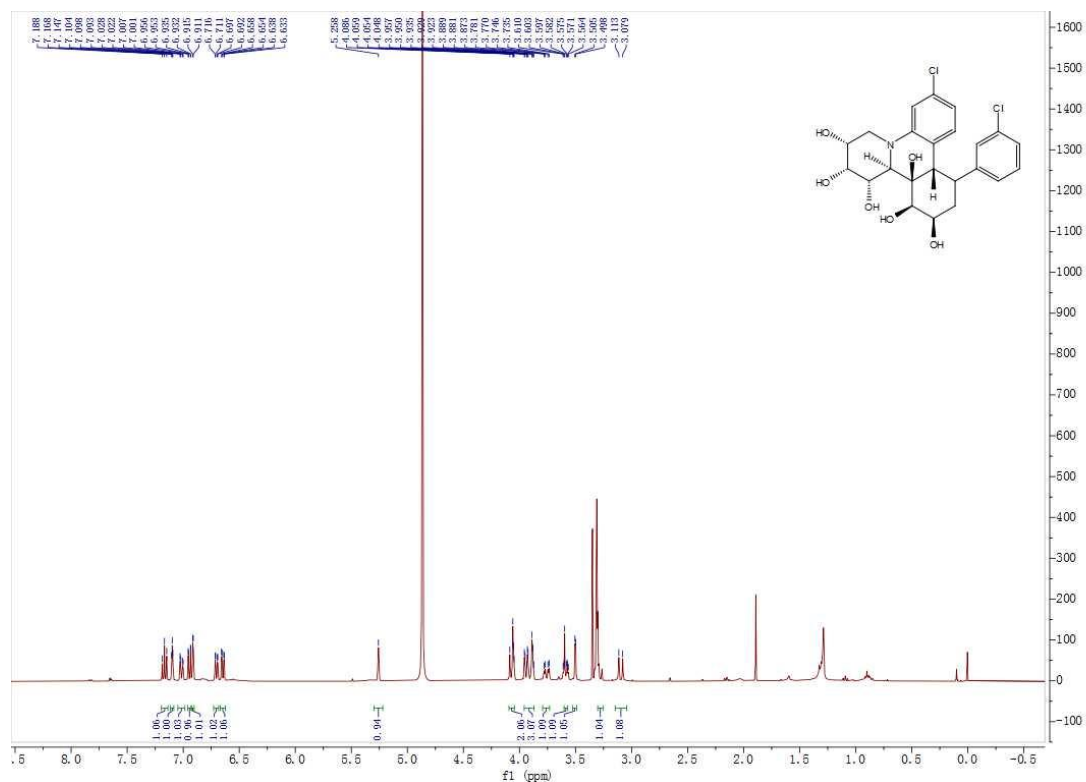

Fig.33  $^1\text{H}$  NMR of compound 5n

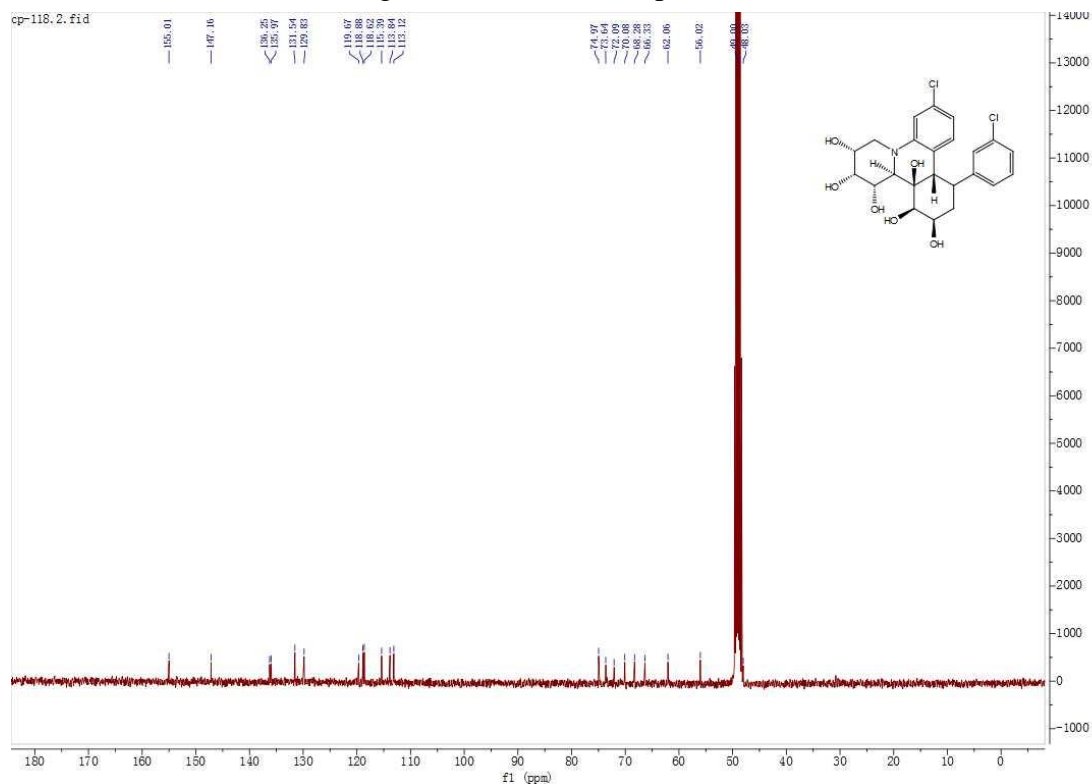

Fig.34  $^{13}\text{C}$  NMR of compound 5n

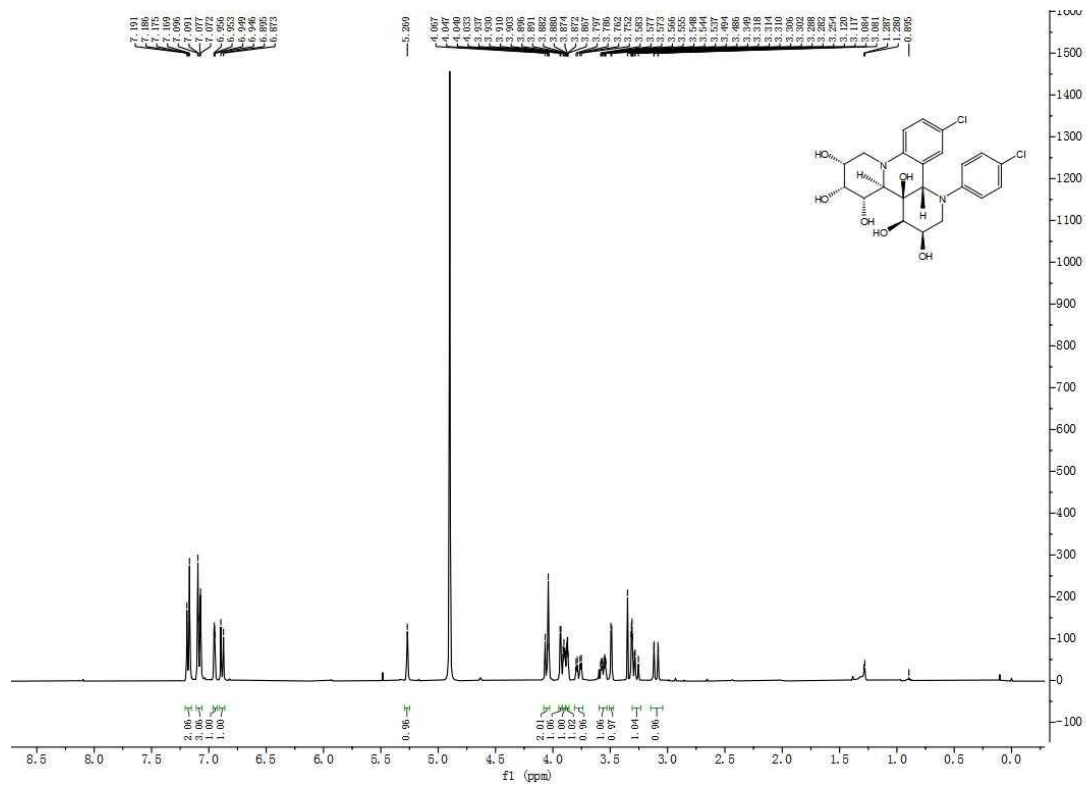

Fig.35  $^1\text{H NMR}$  of compound 50

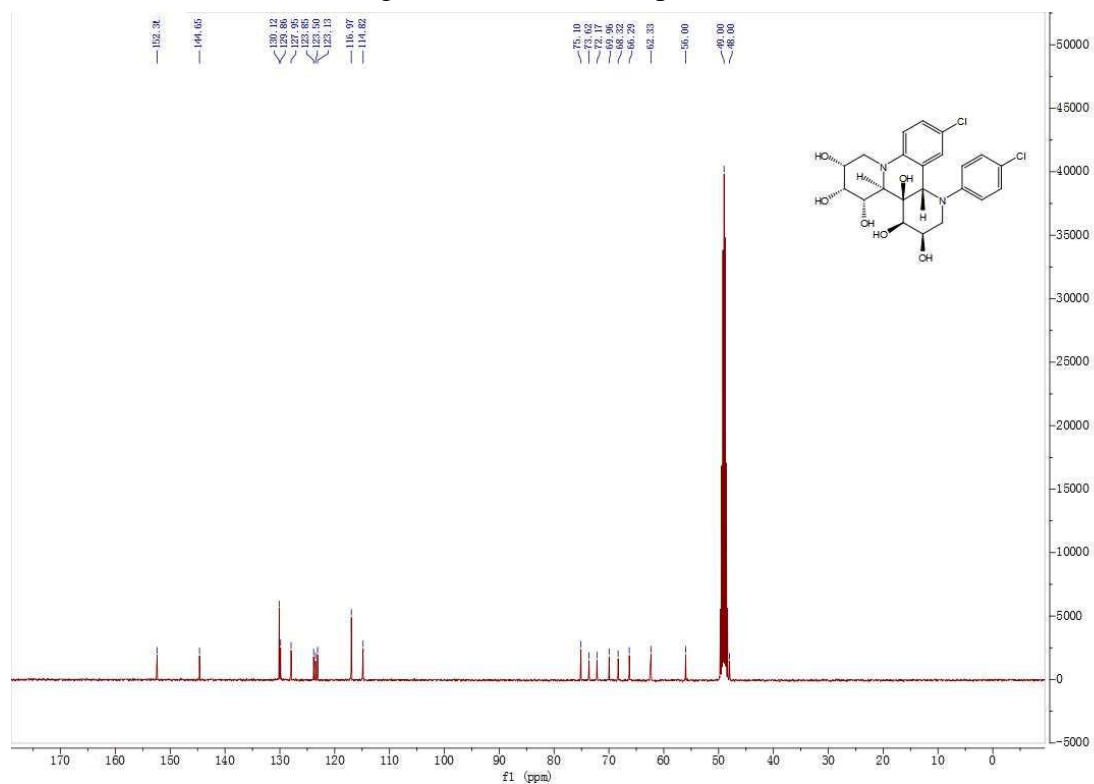

Fig.36  $^{13}\text{C NMR}$  of compound 50

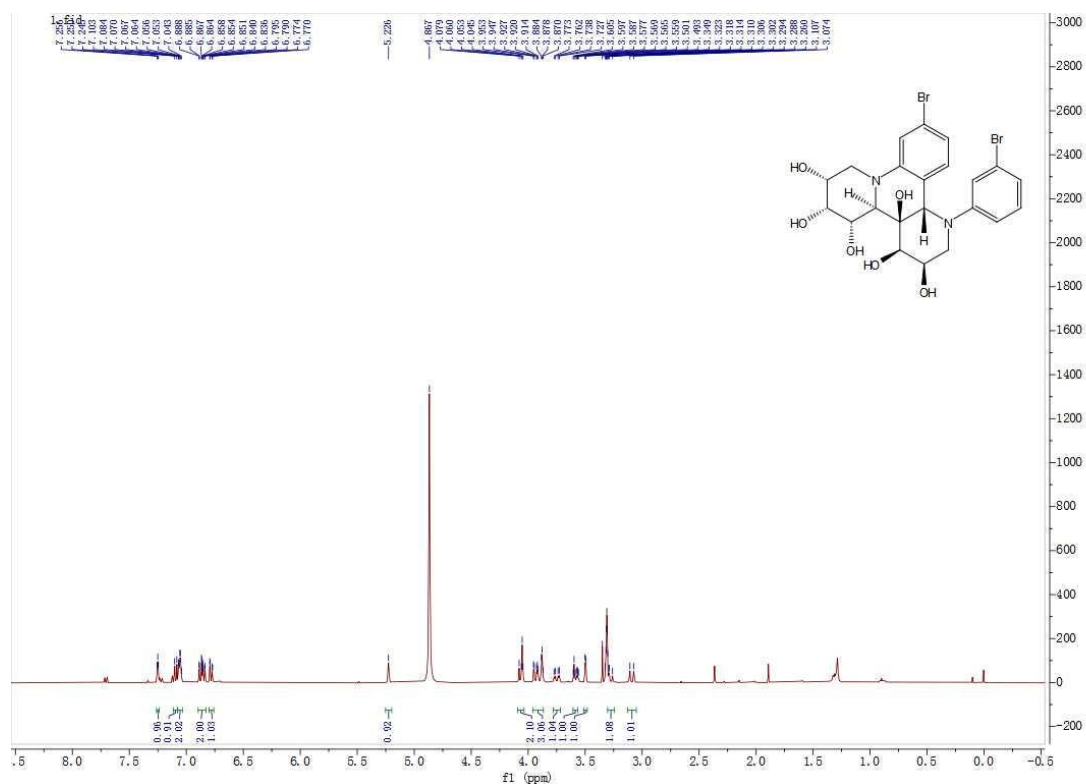

Fig.37  $^1\text{H}$  NMR of compound 5p

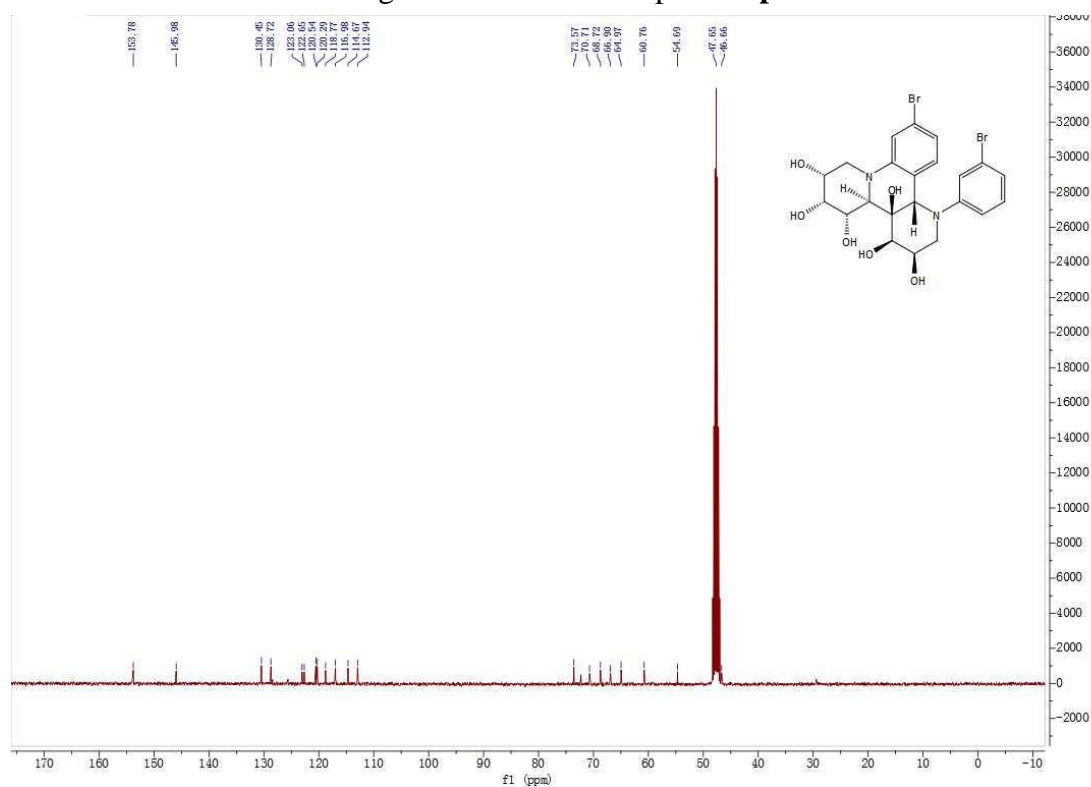

Fig.38  $^{13}\text{C}$  NMR of compound 5p





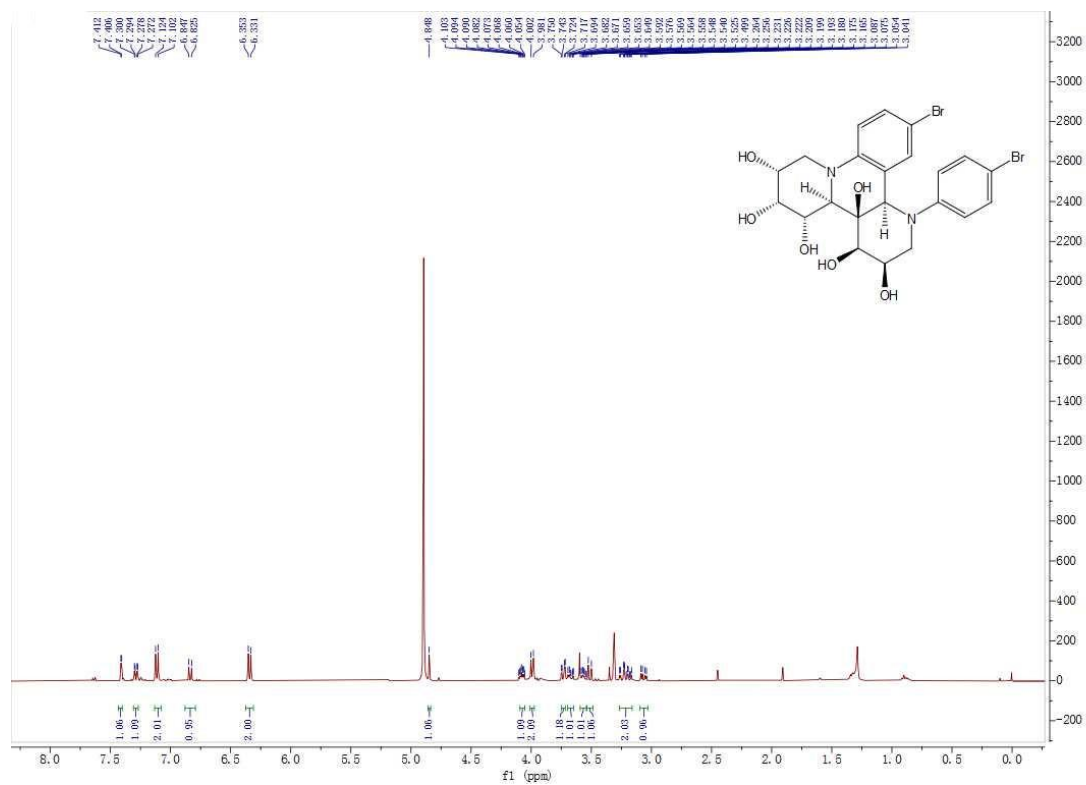

Fig.41  $^1\text{H}$  NMR of compound 5q-1

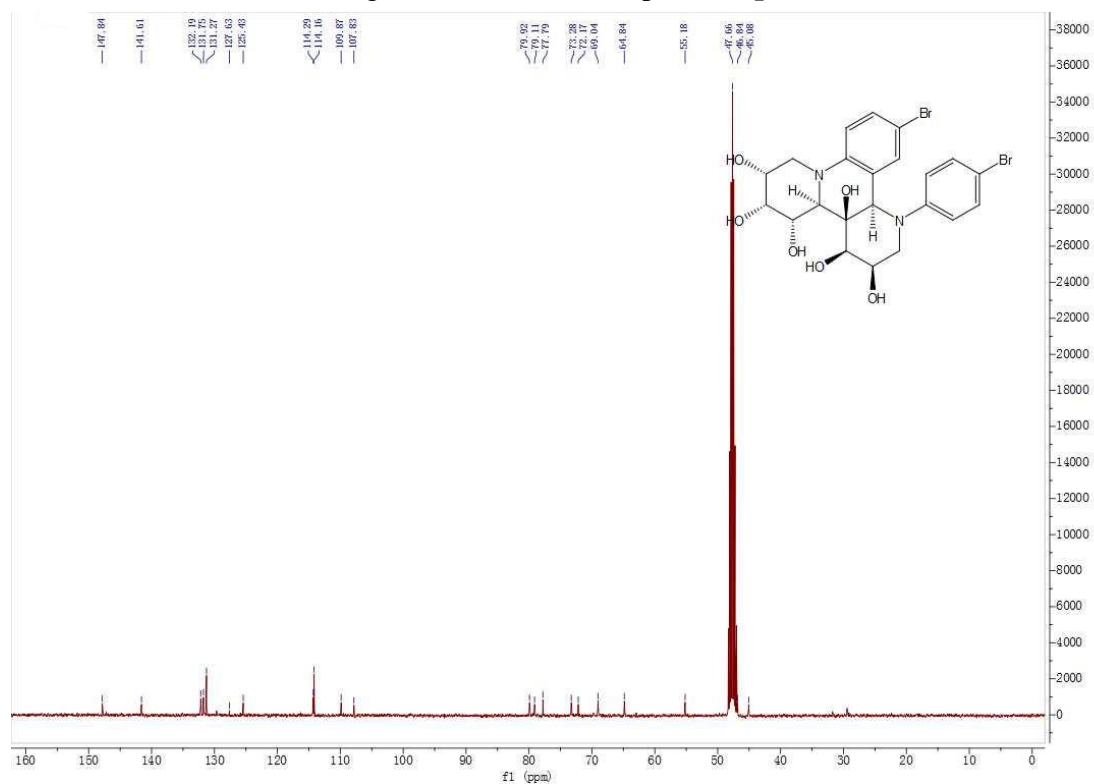

Fig.42  $^{13}\text{C}$  NMR of compound 5q-1

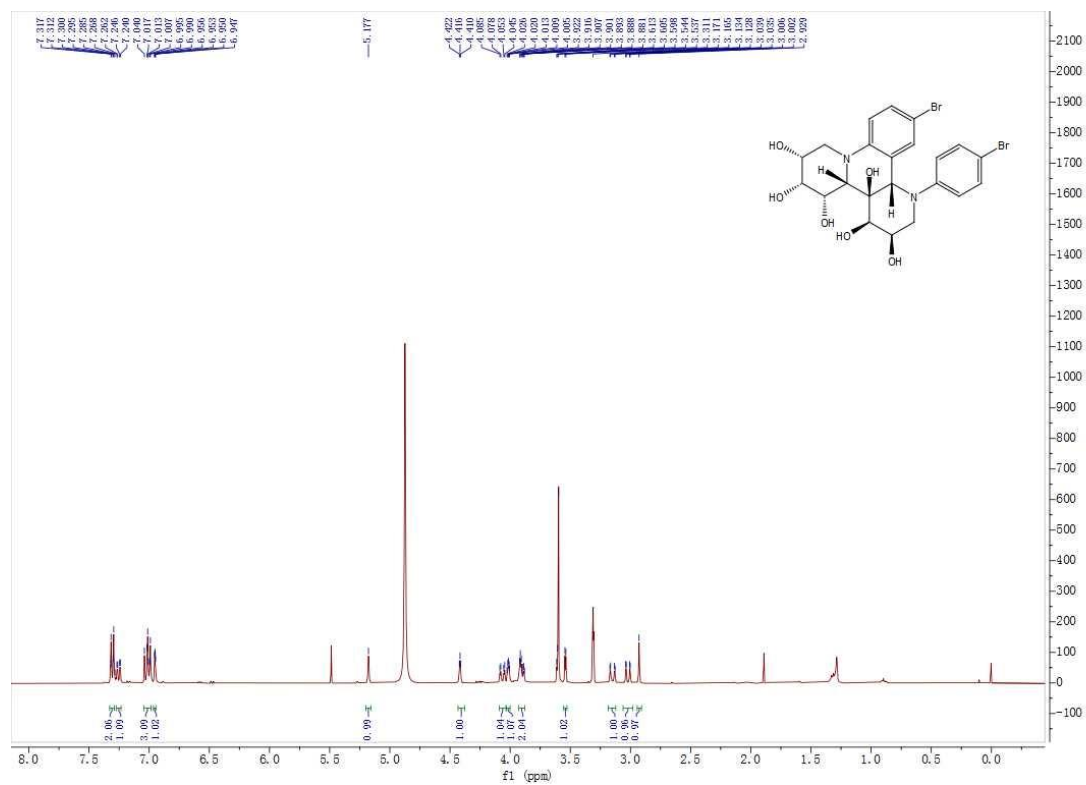

Fig.43  $^1\text{H}$  NMR of compound 5q-2

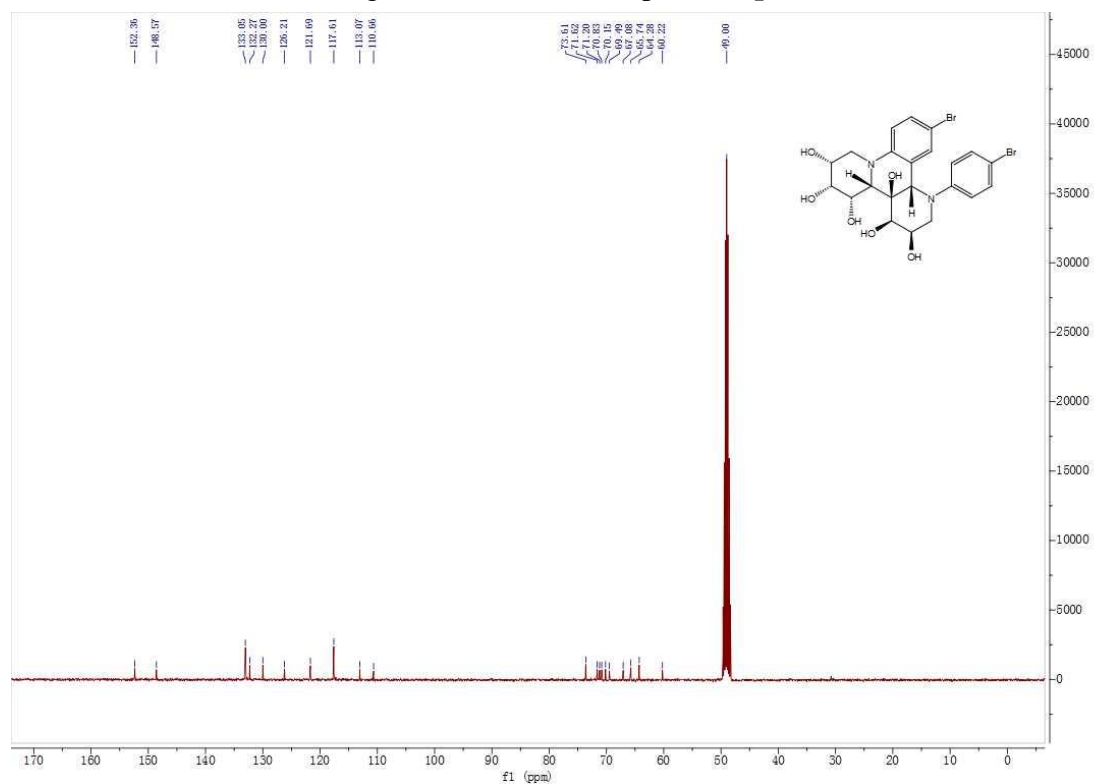

Fig.44  $^{13}\text{C}$  NMR of compound 5q-2

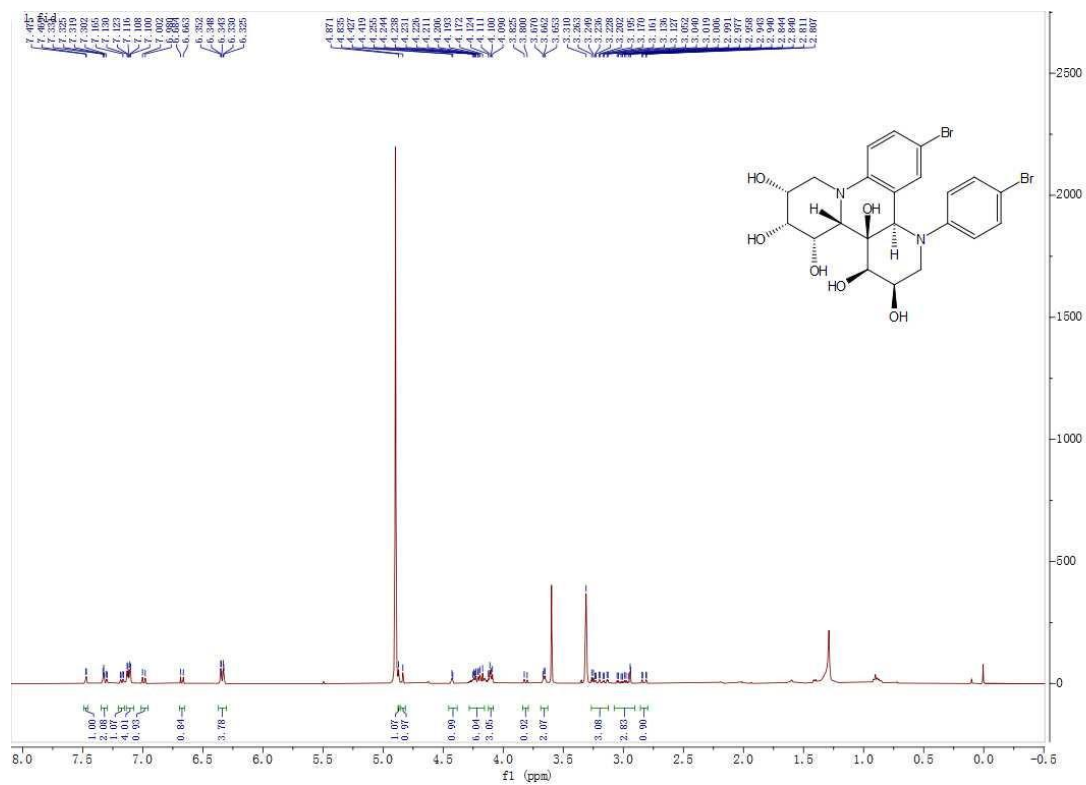

Fig.45  $^1\text{H}$  NMR of mixed compounds **5q-1** and **5q-3**

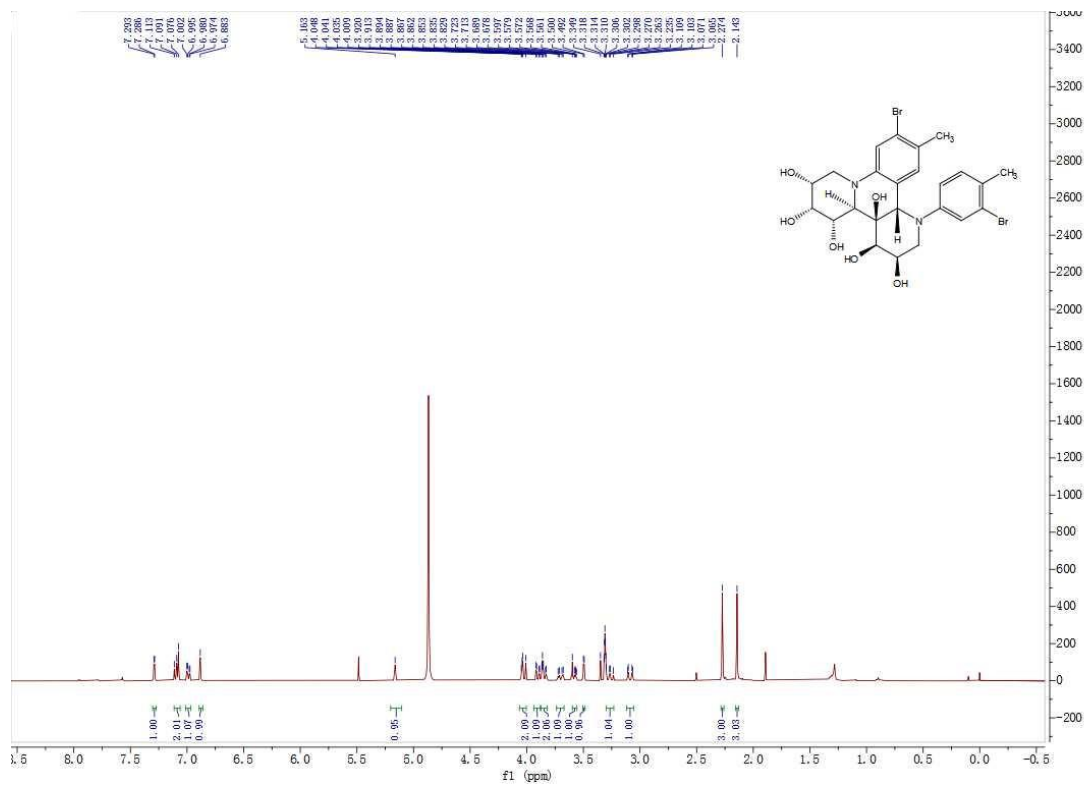

Fig.46  $^1\text{H}$  NMR of compound **5s**

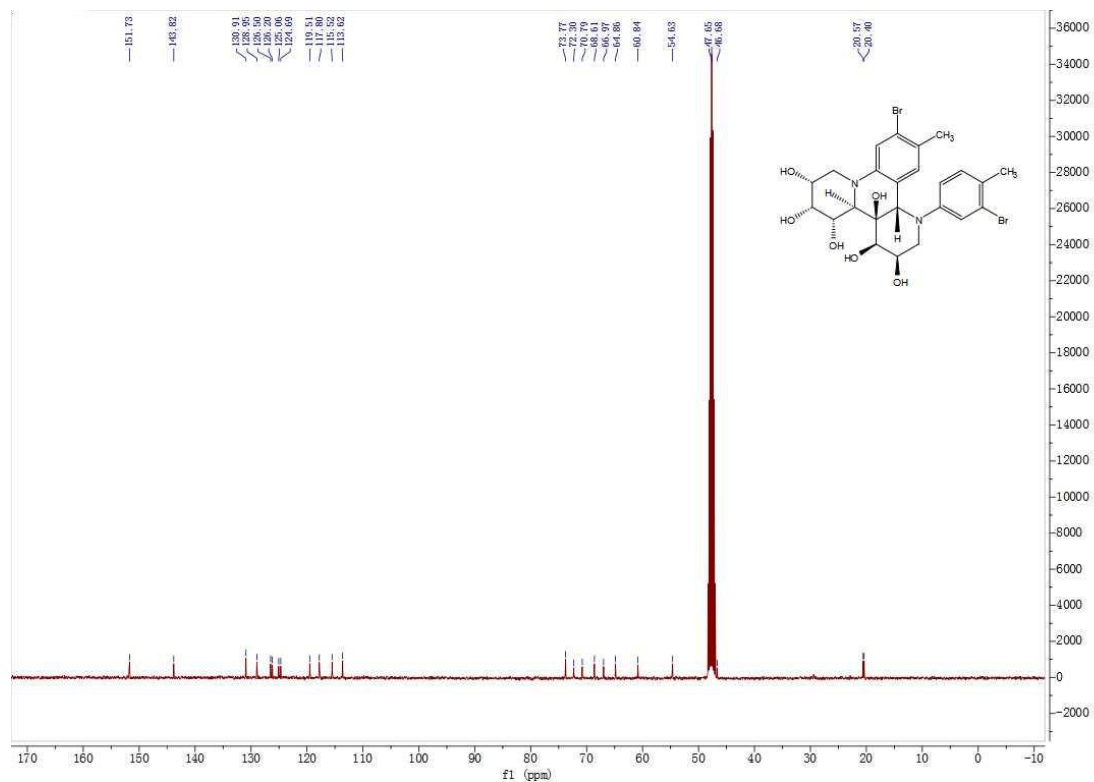

Fig.47  $^{13}\text{C}$  NMR of compound **5s**

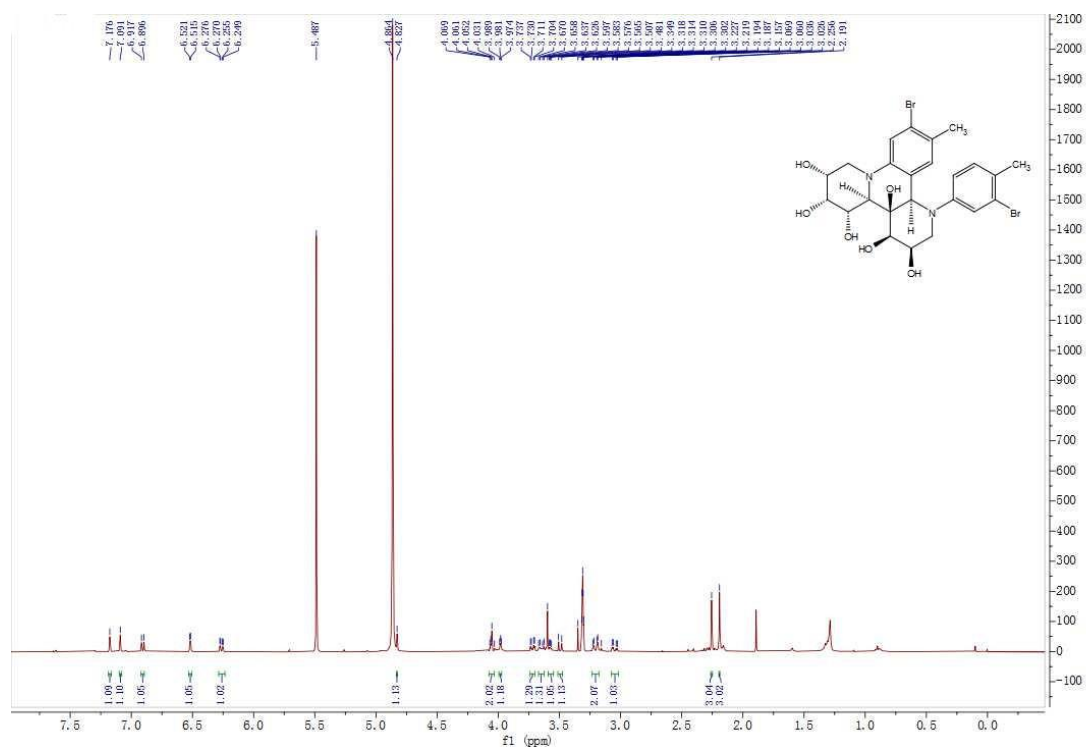

Fig.48  $^1\text{H}$  NMR of compound 5s-1

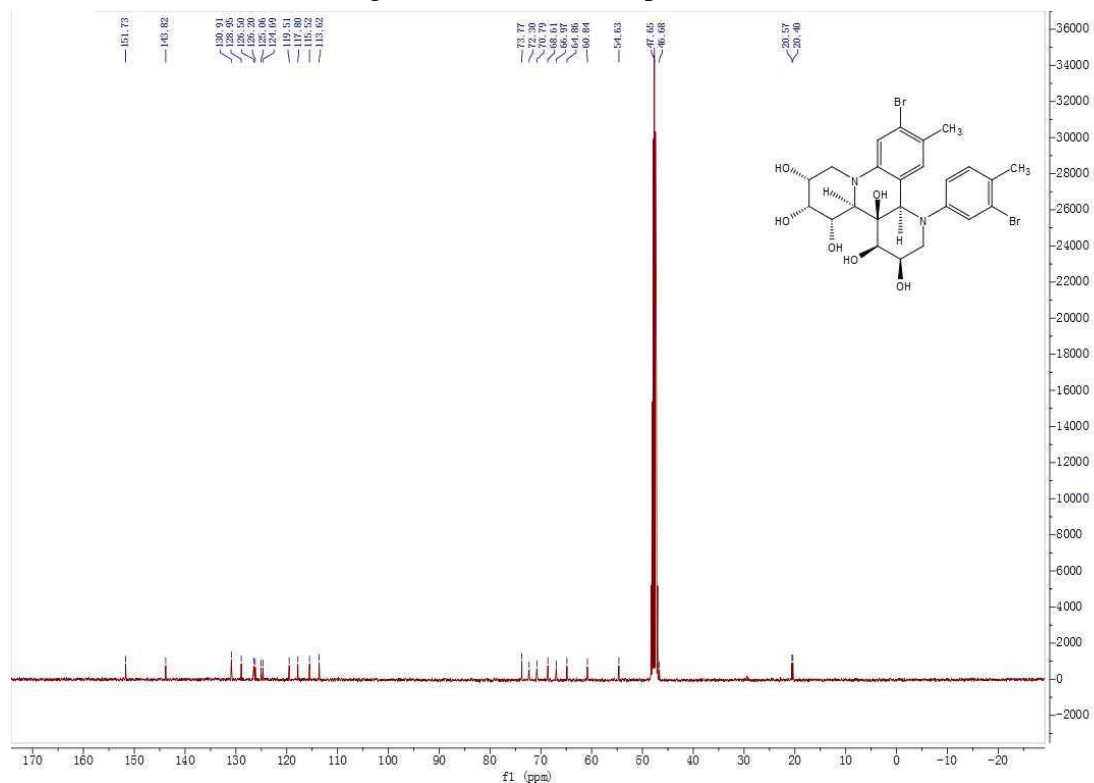

Fig.49  $^{13}\text{C}$  NMR of compound 5s-1

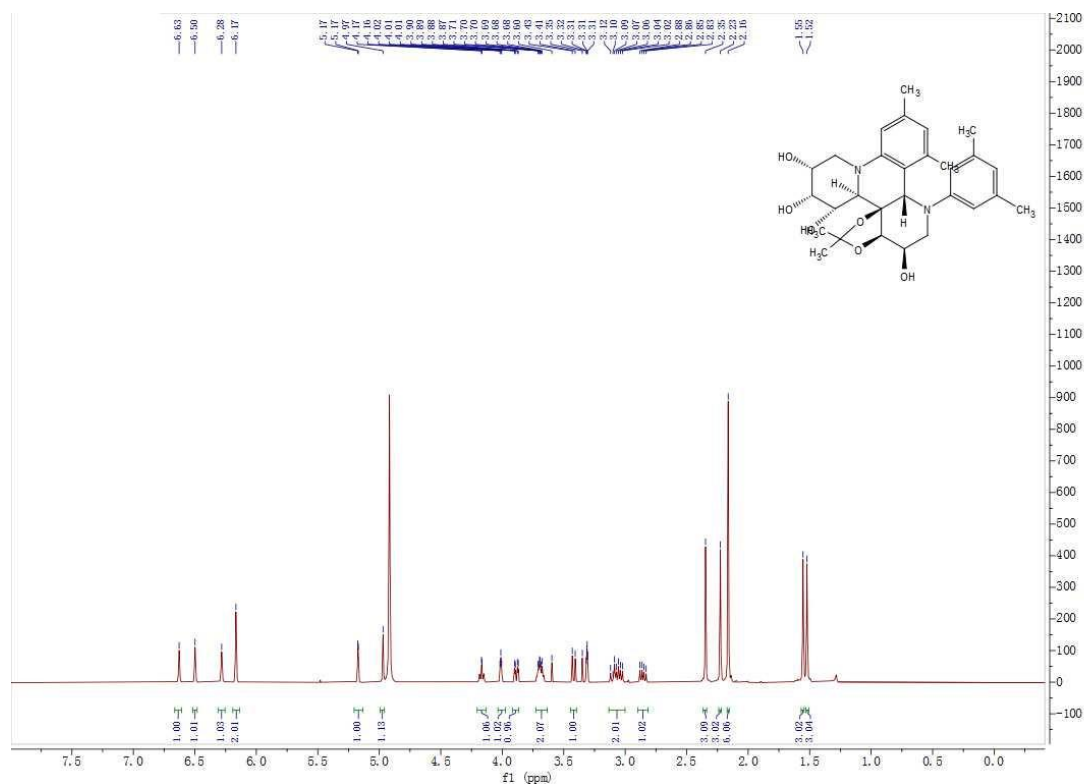

Fig.50  $^1\text{H}$  NMR of compound **5t**

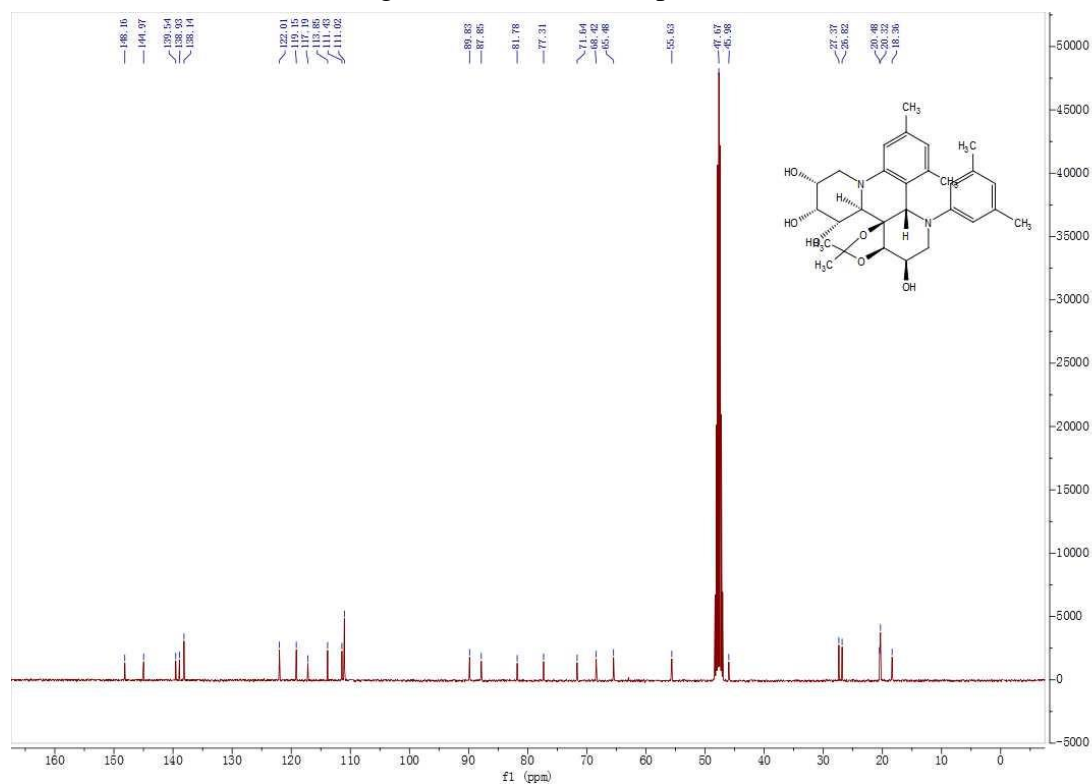

Fig.51  $^{13}\text{C}$  NMR of compound **5t**







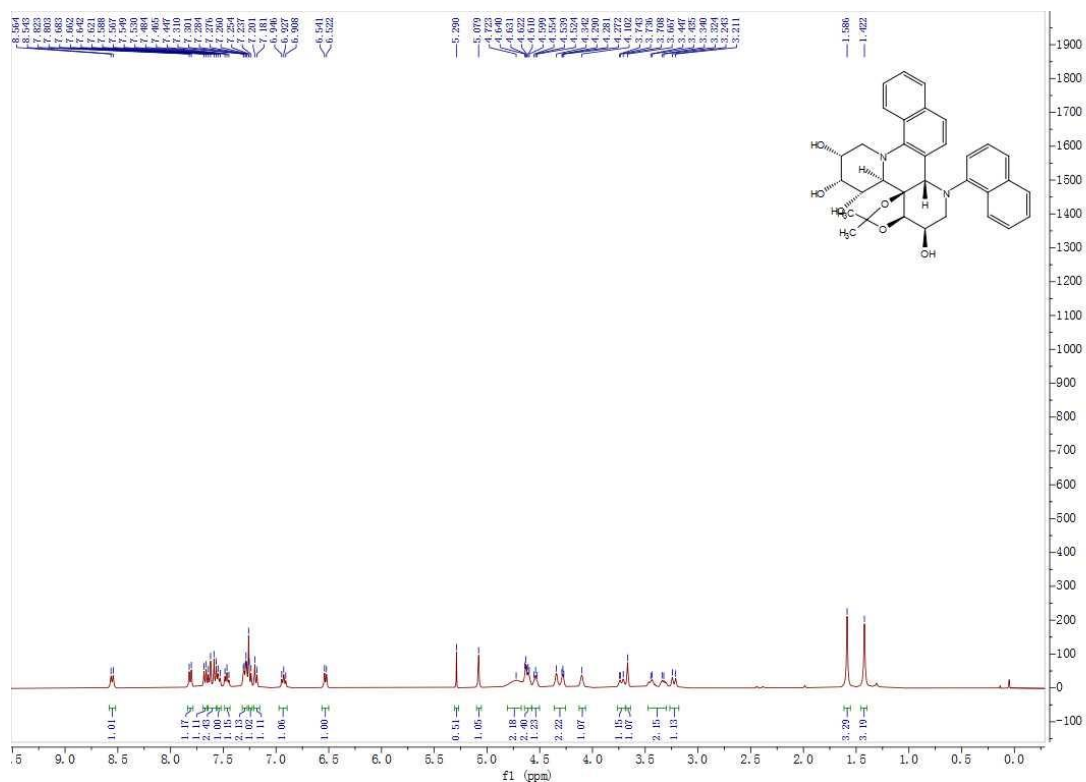

Fig.56  $^1\text{H}$  NMR of compound 5w'

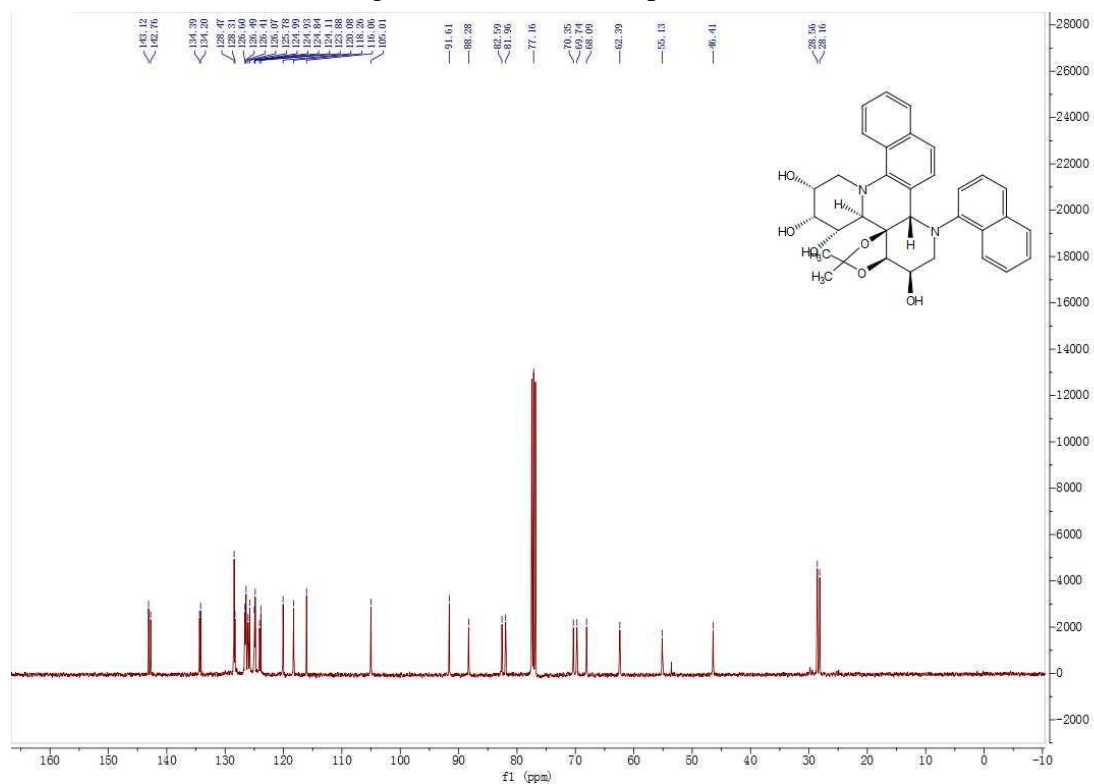

Fig.57  $^{13}\text{C}$  NMR of compound 5w'

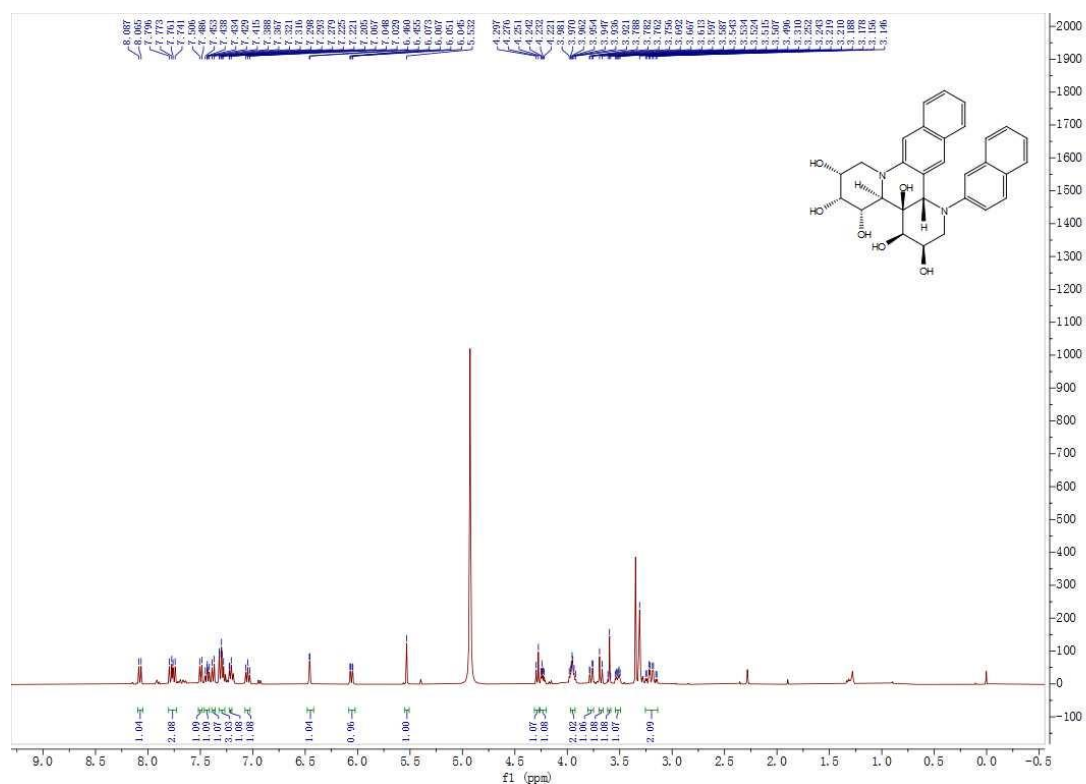

Fig.58  $^1\text{H}$  NMR of compound **5x**

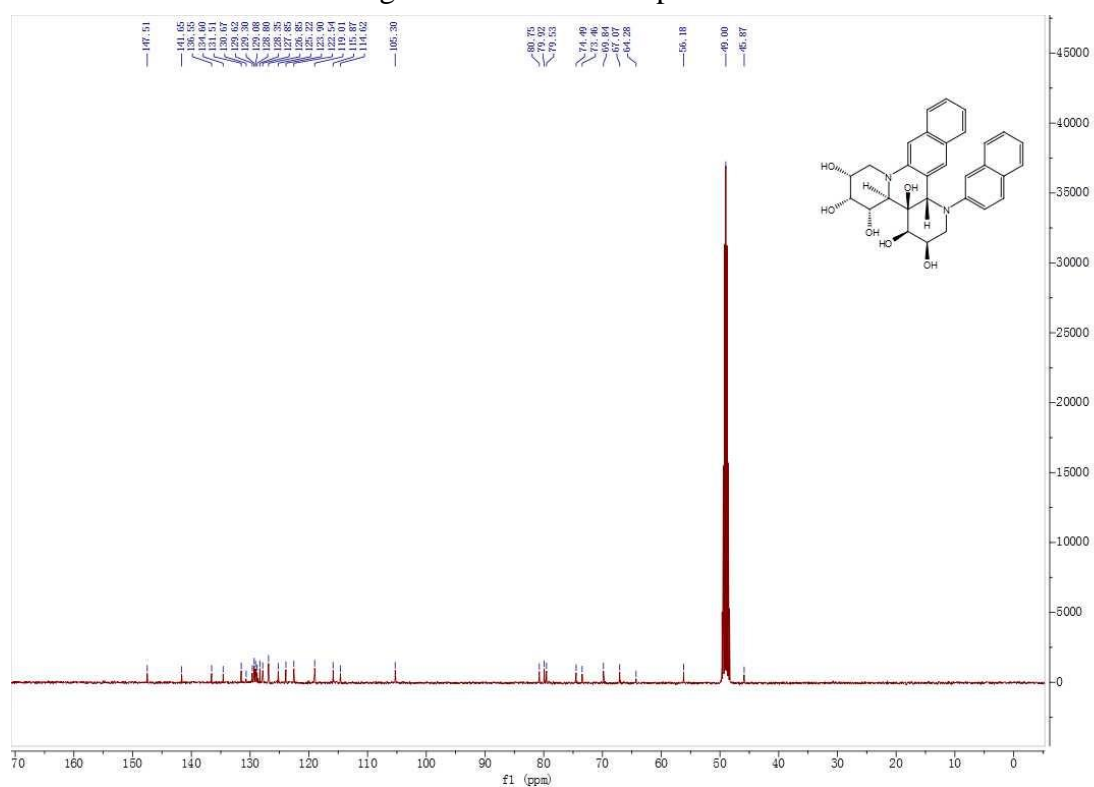

Fig.59  $^{13}\text{C}$  NMR of compound **5x**

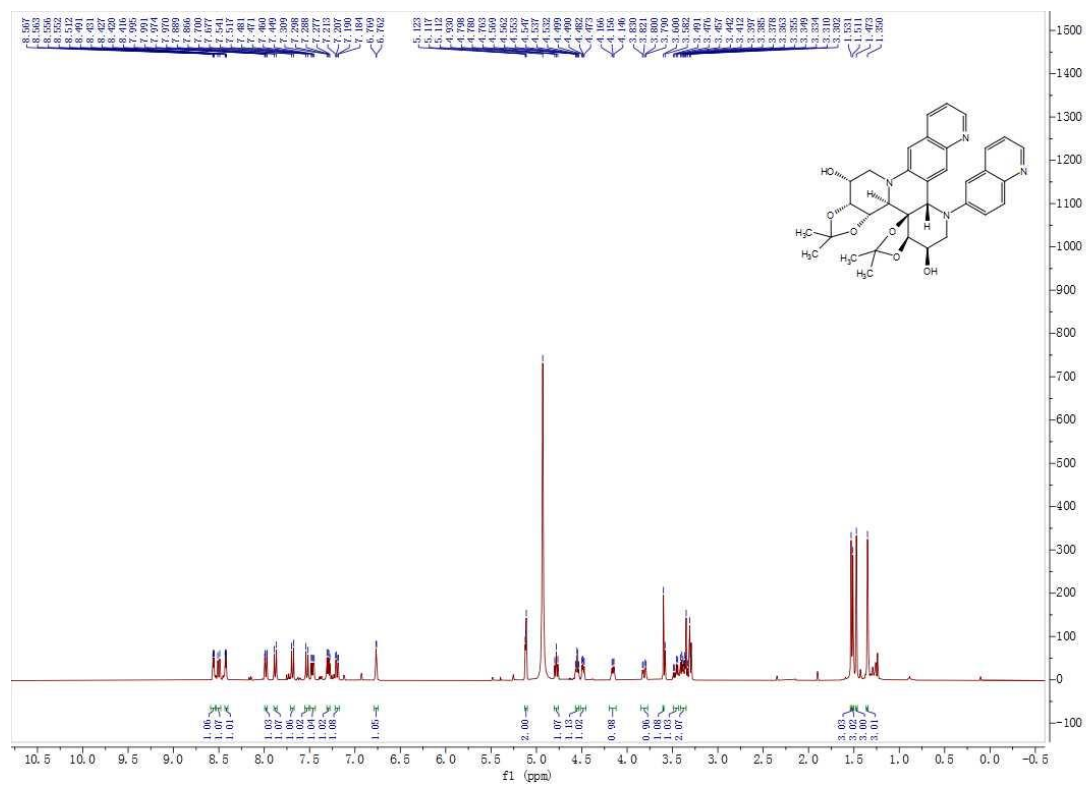

Fig.60  $^1\text{H}$  NMR of compound 5y''

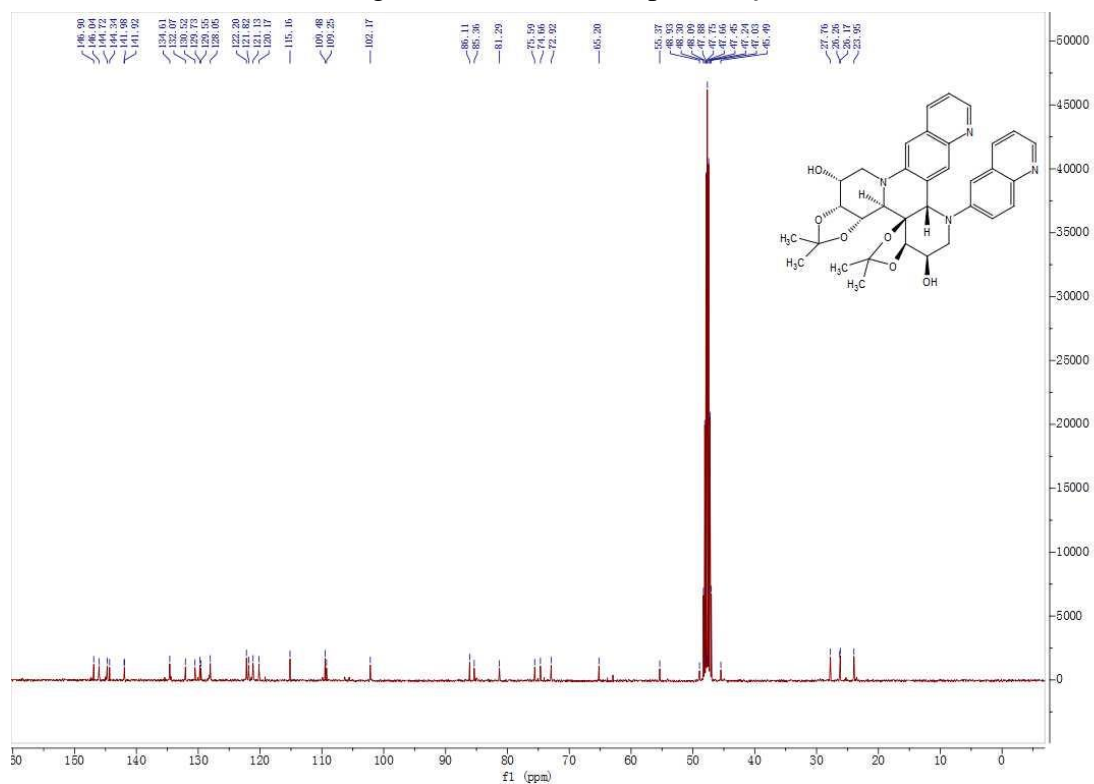

Fig.61  $^{13}\text{C}$  NMR of compound 5y''

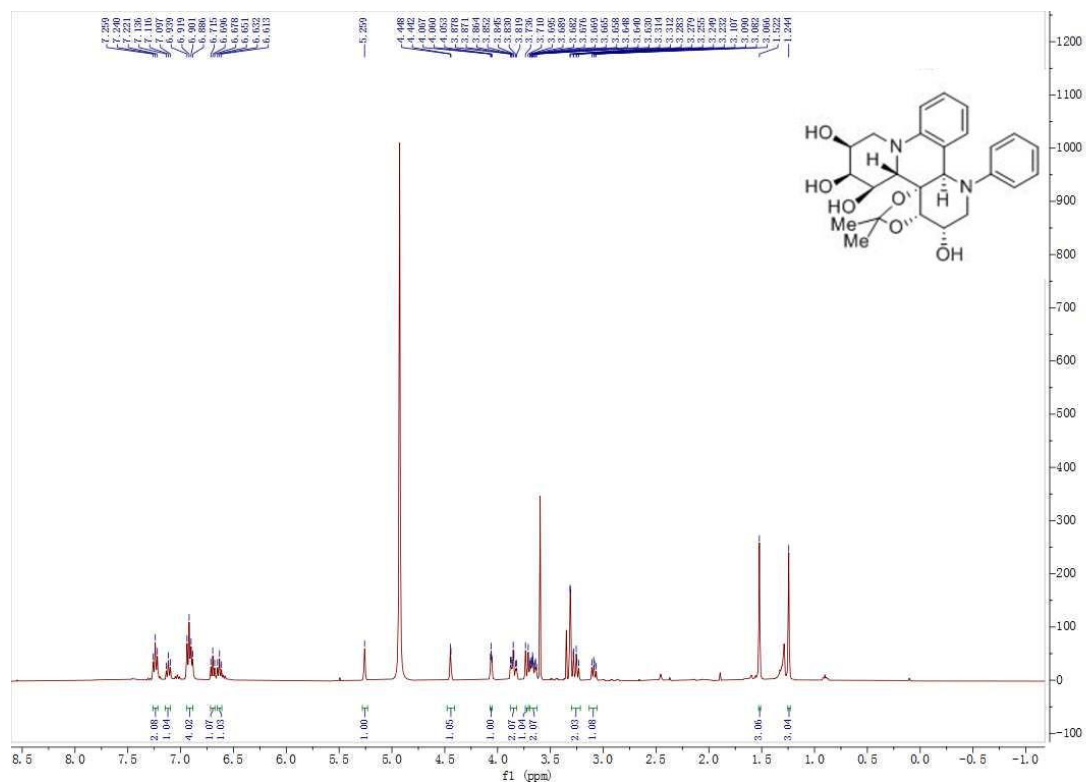

Fig.62  $^1\text{H}$  NMR of compound 6a'

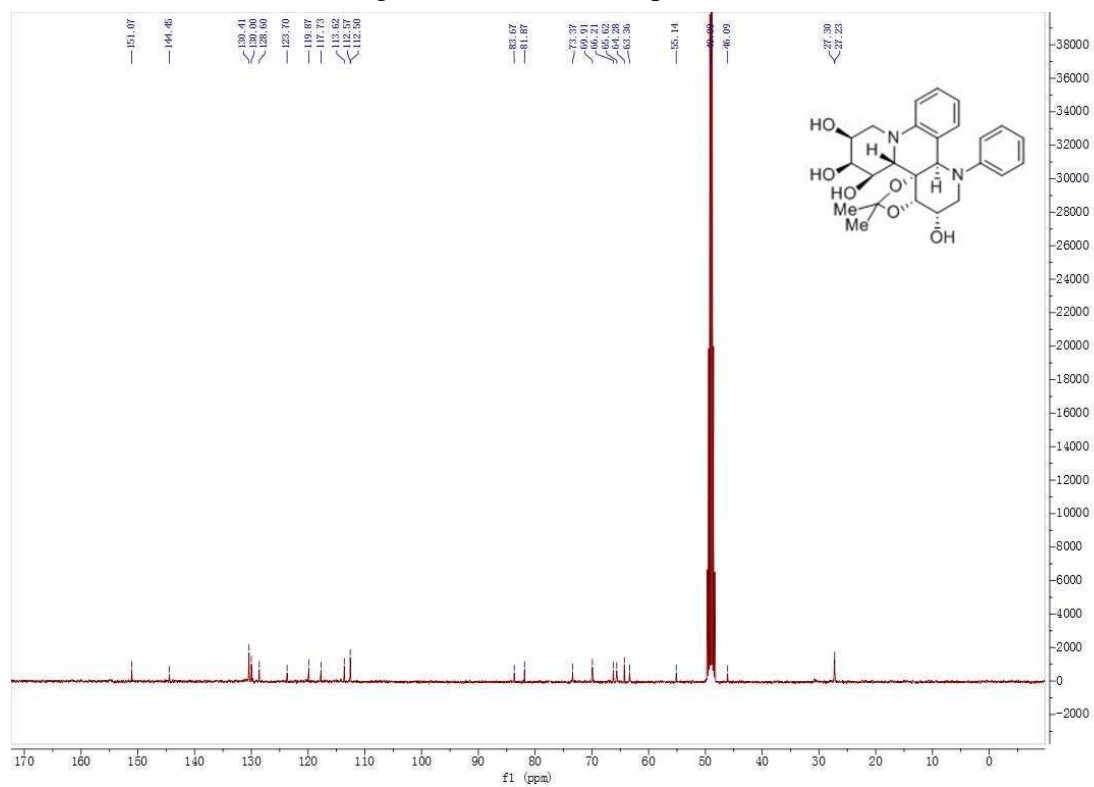

Fig.63  $^{13}\text{C}$  NMR of compound 6a'

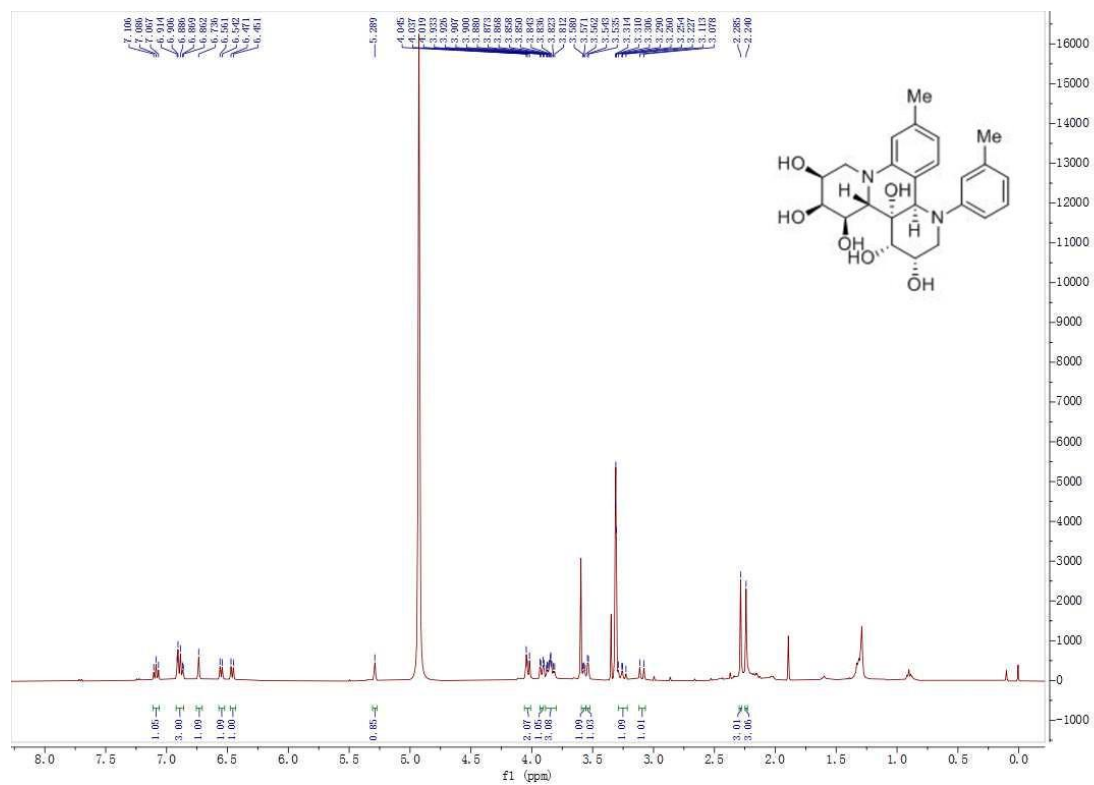

Fig.64  $^1\text{H}$  NMR of compound **6c**

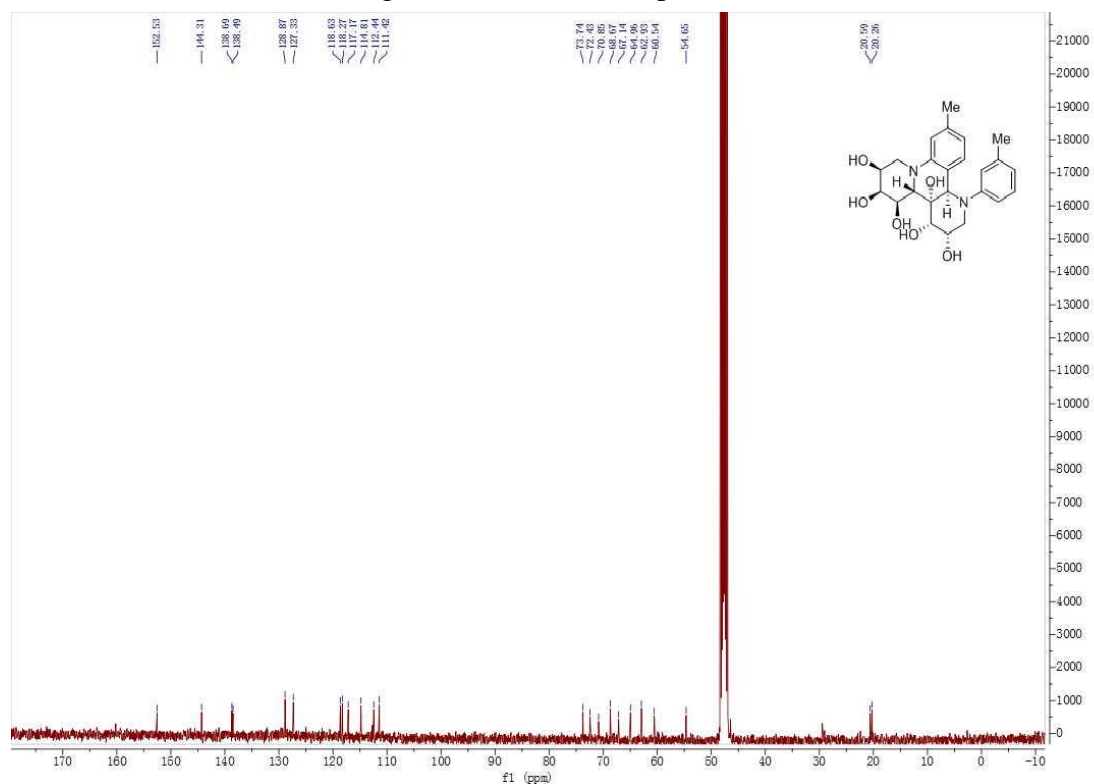

Fig.65  $^{13}\text{C}$  NMR of compound **6c**



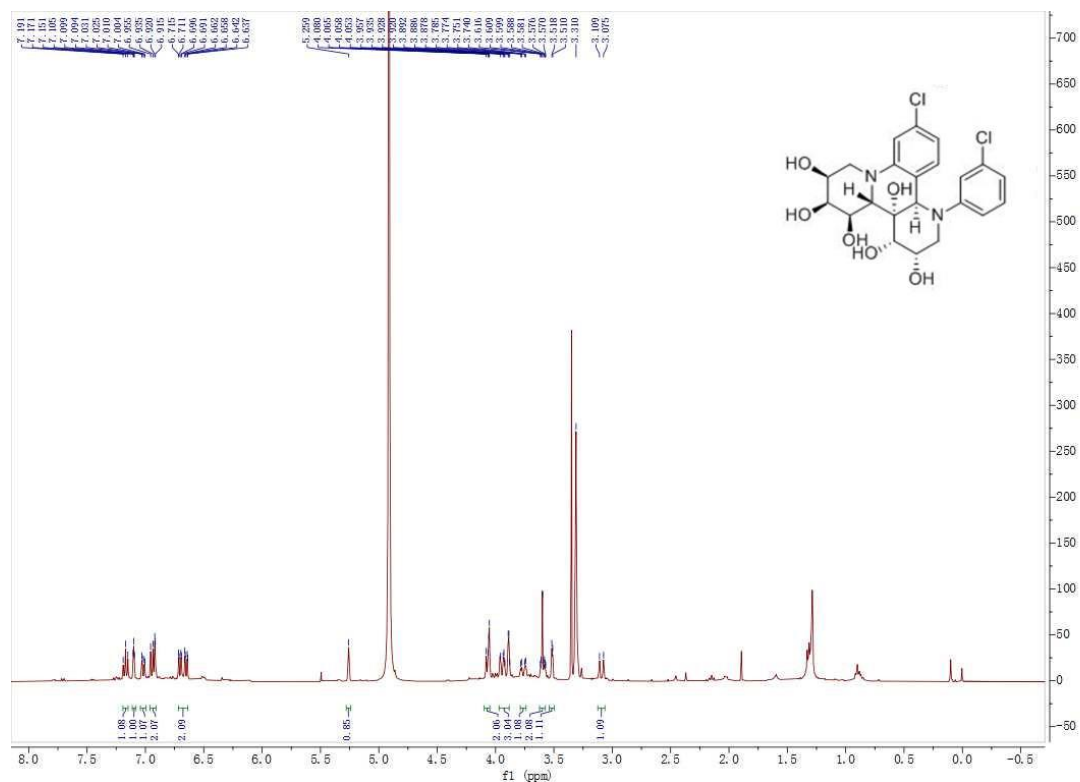

Fig.68  $^1\text{H}$  NMR of compound **6n**

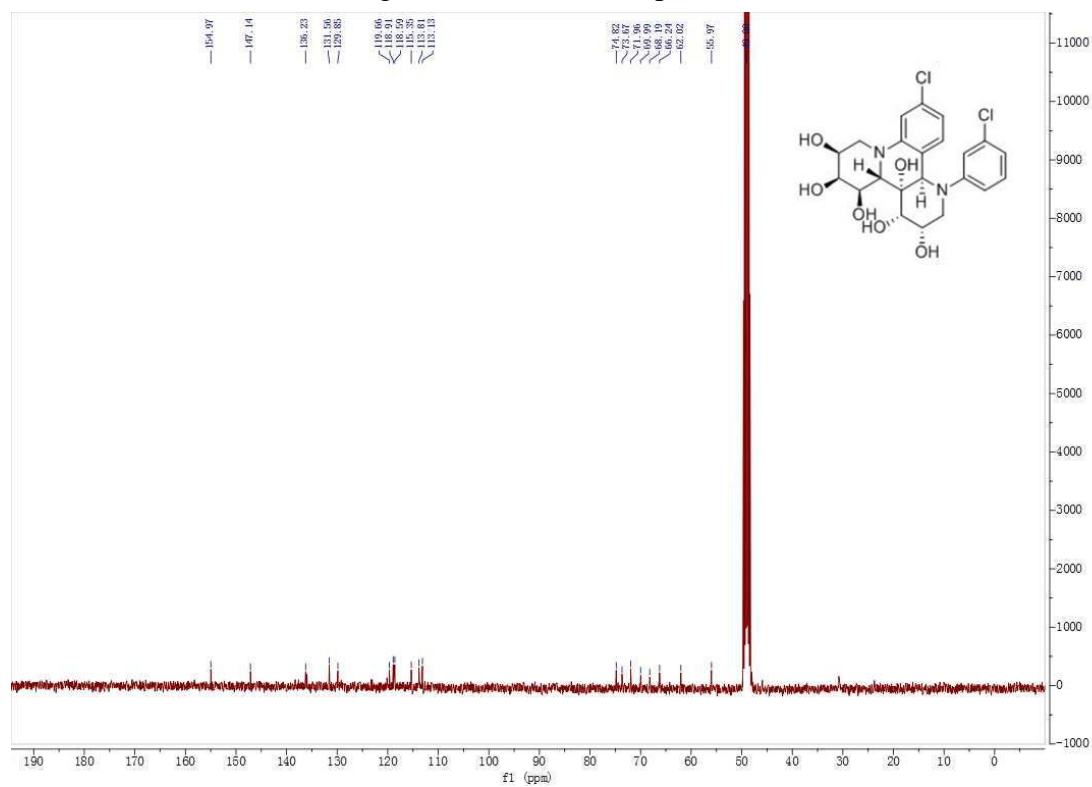

Fig.69  $^{13}\text{C}$  NMR of compound **6n**



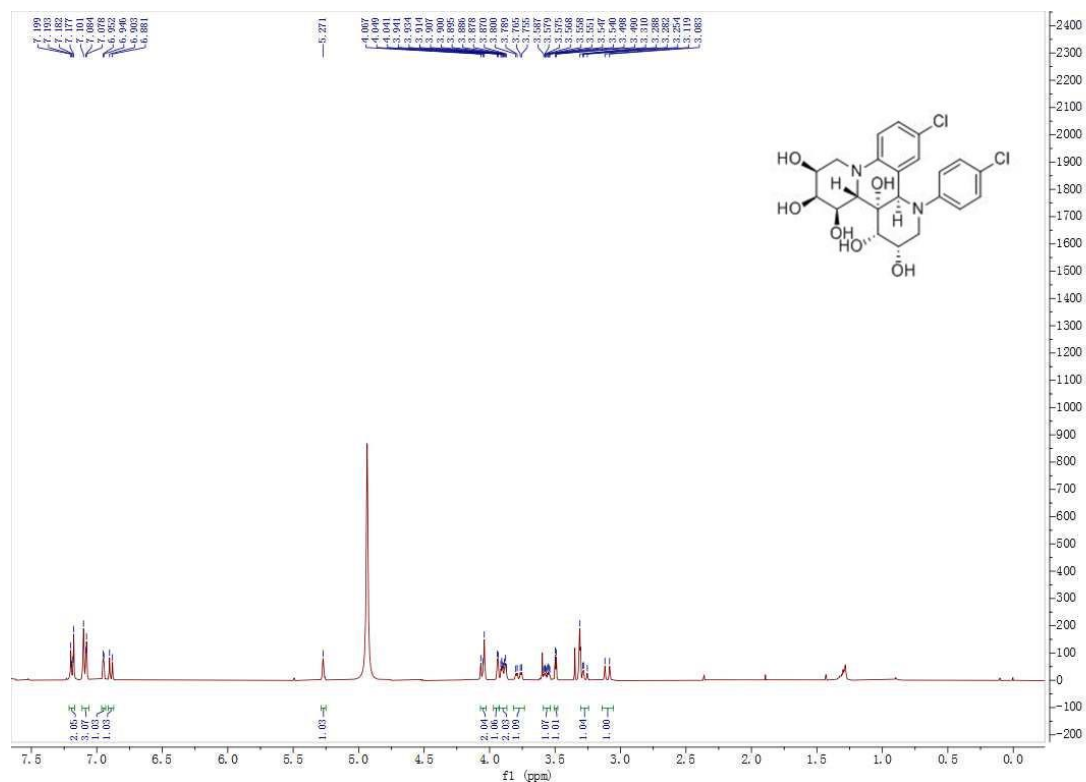

Fig.70 <sup>1</sup>H NMR of compound **60**

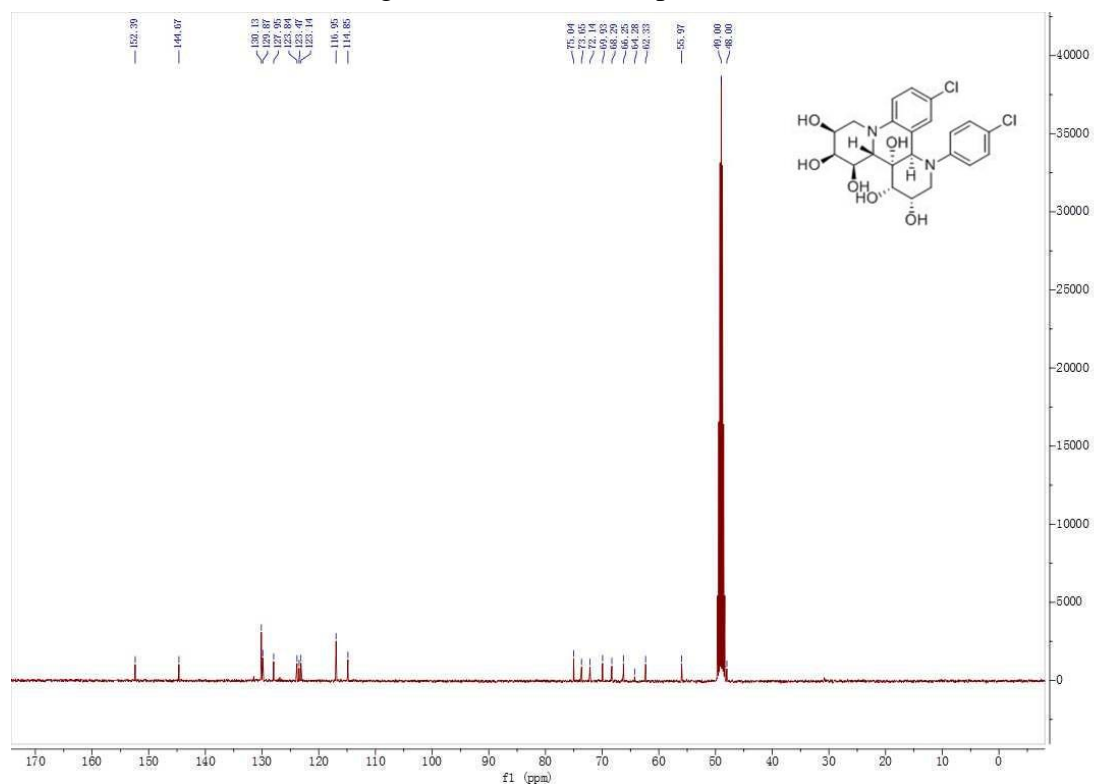

Fig.71 <sup>13</sup>C NMR of compound **60**

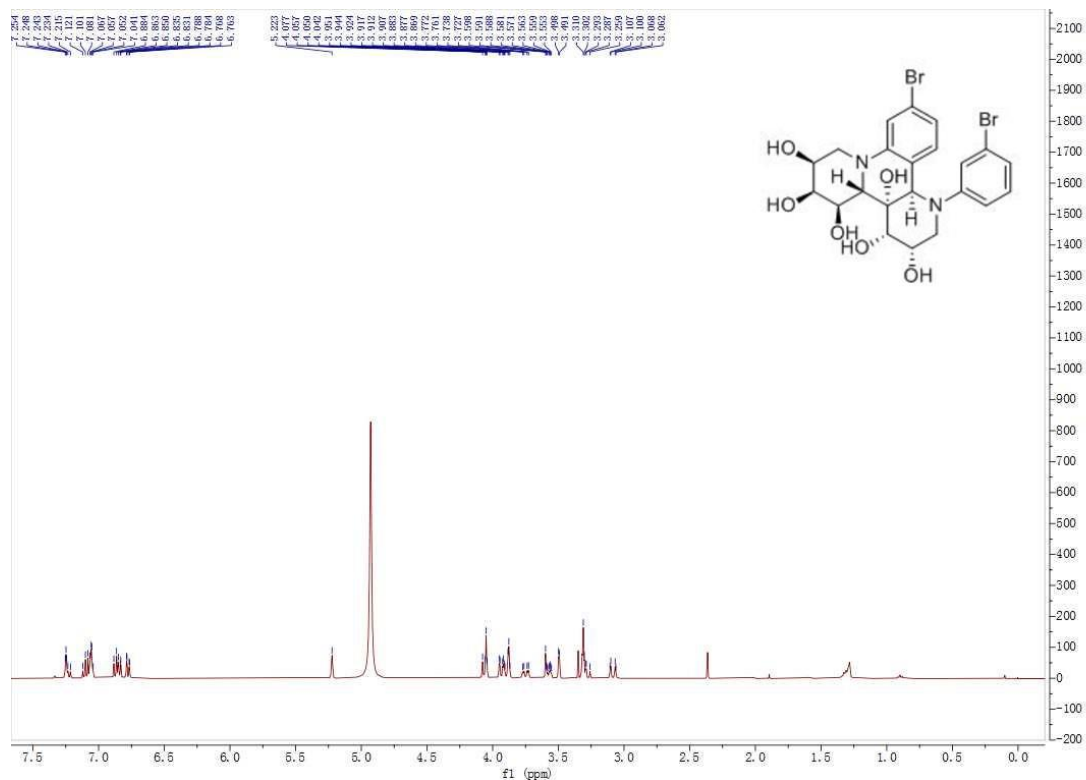

Fig.72  $^1\text{H}$  NMR of compound **6p**

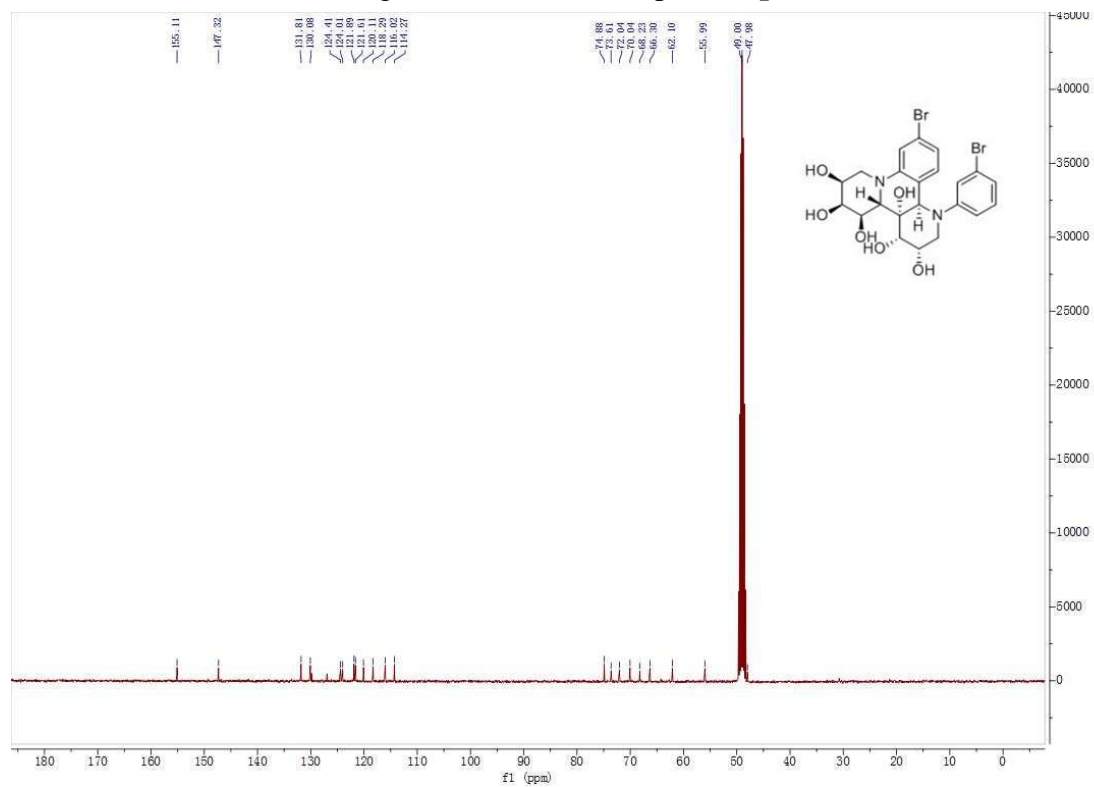

Fig.73  $^{13}\text{C}$  NMR of compound **6p**

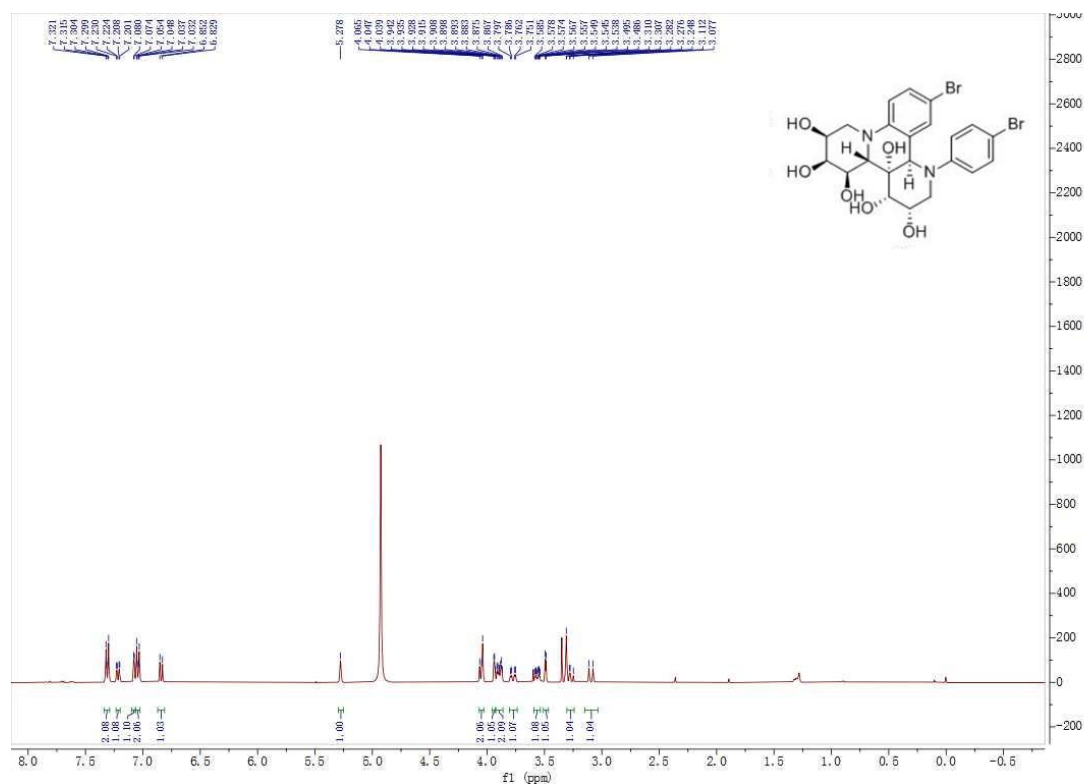

Fig.74 <sup>1</sup>H NMR of compound 6q

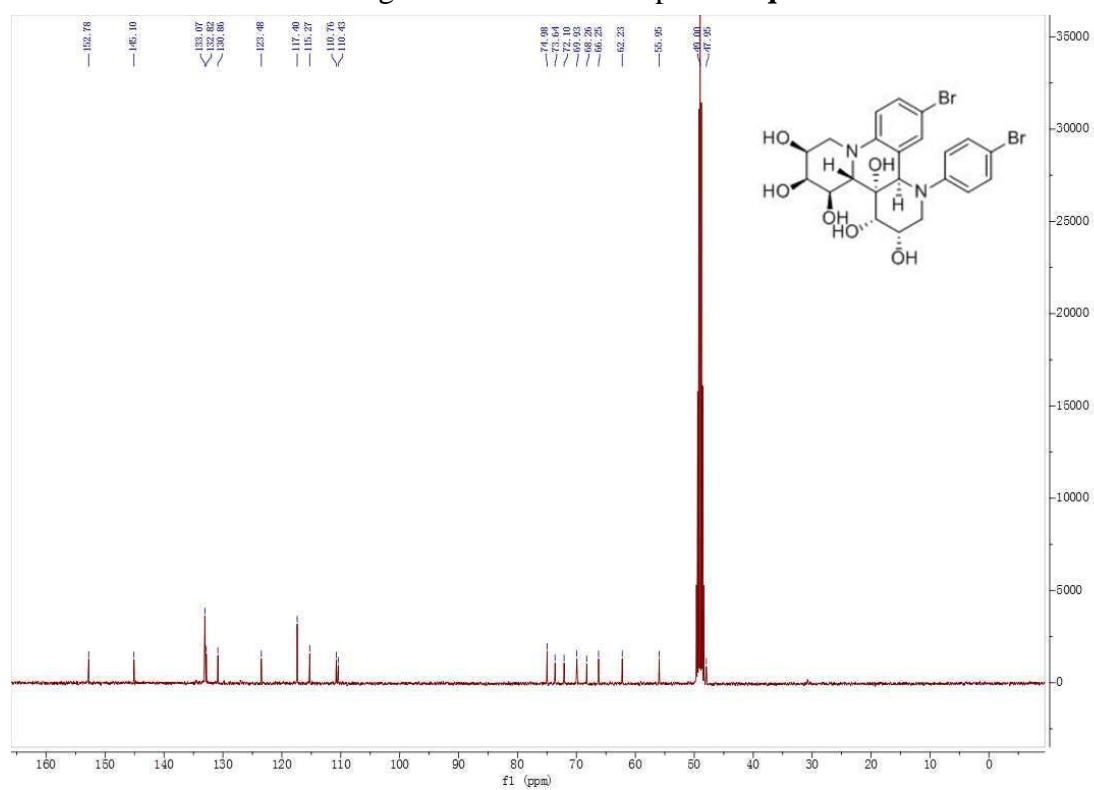

Fig.75 <sup>13</sup>C NMR of compound 6q

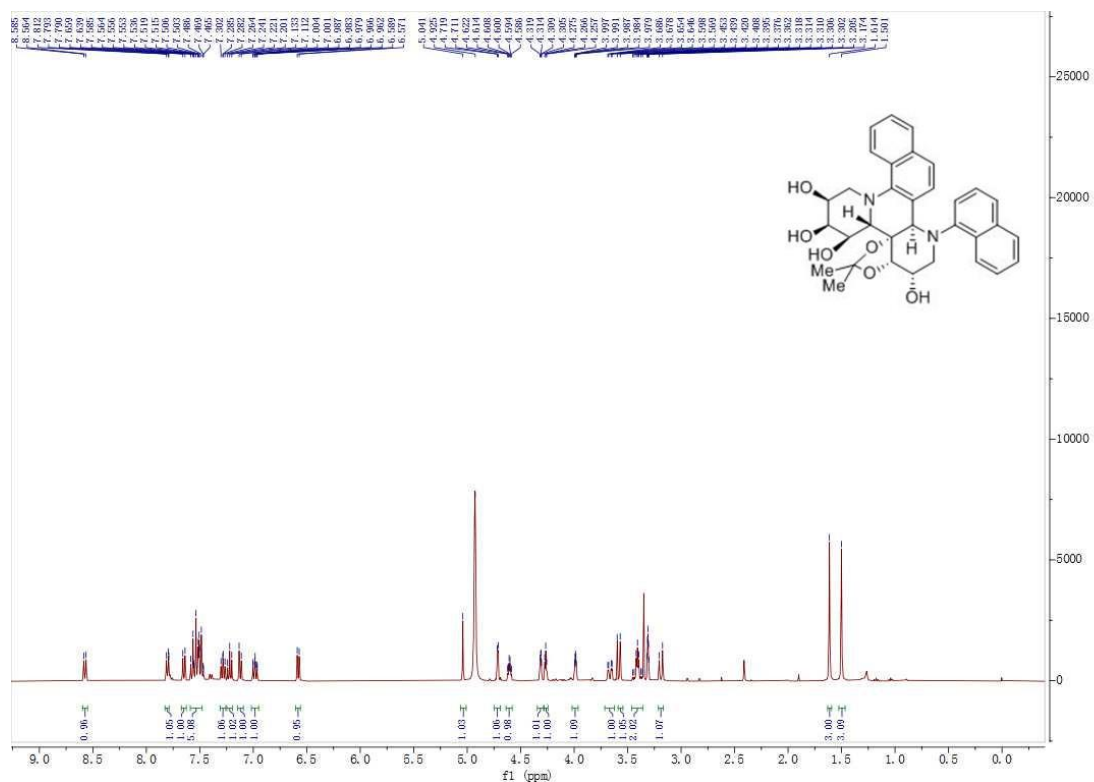

Fig.76  $^1\text{H}$  NMR of compound **6w'**

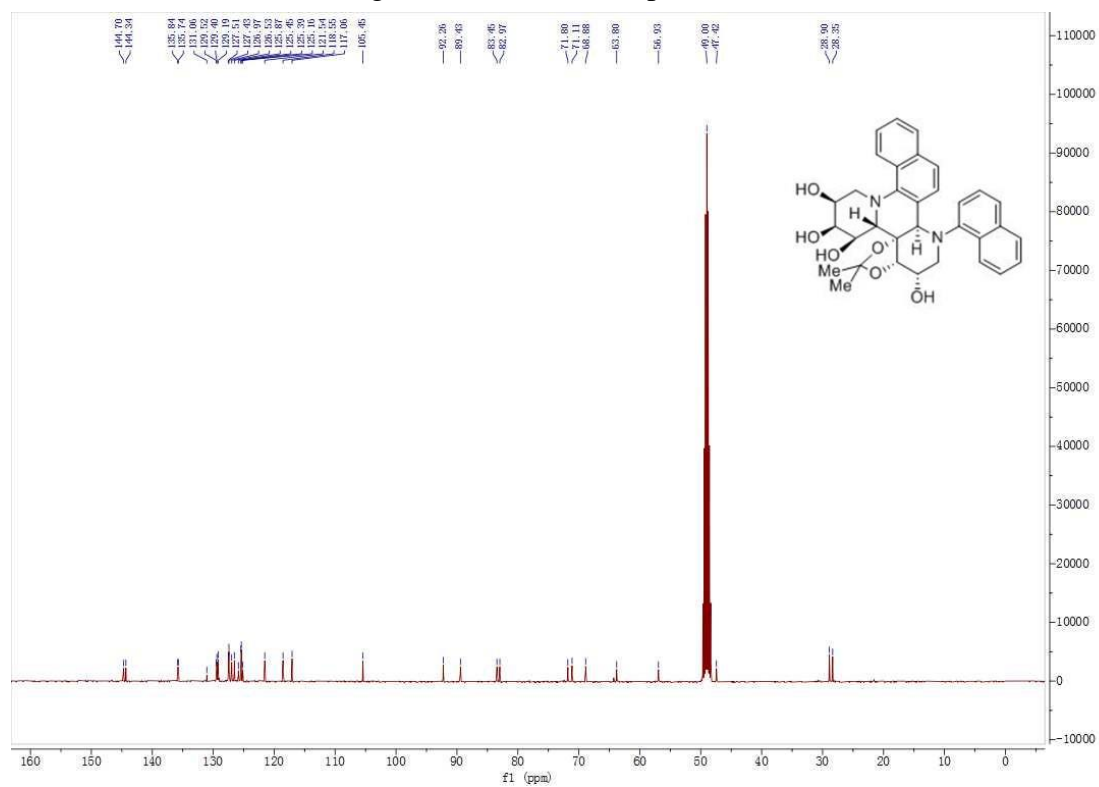

Fig.77  $^{13}\text{C}$  NMR of compound **6w'**

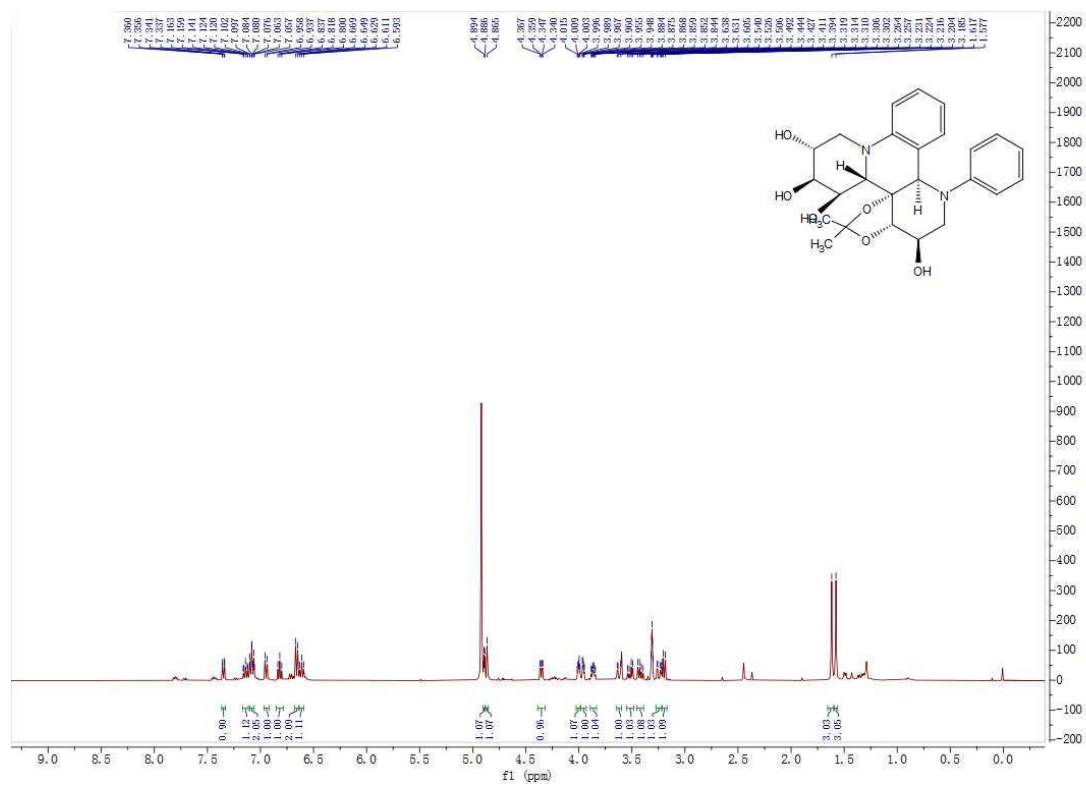

Fig.78  $^1\text{H}$  NMR of compound 7a-1'

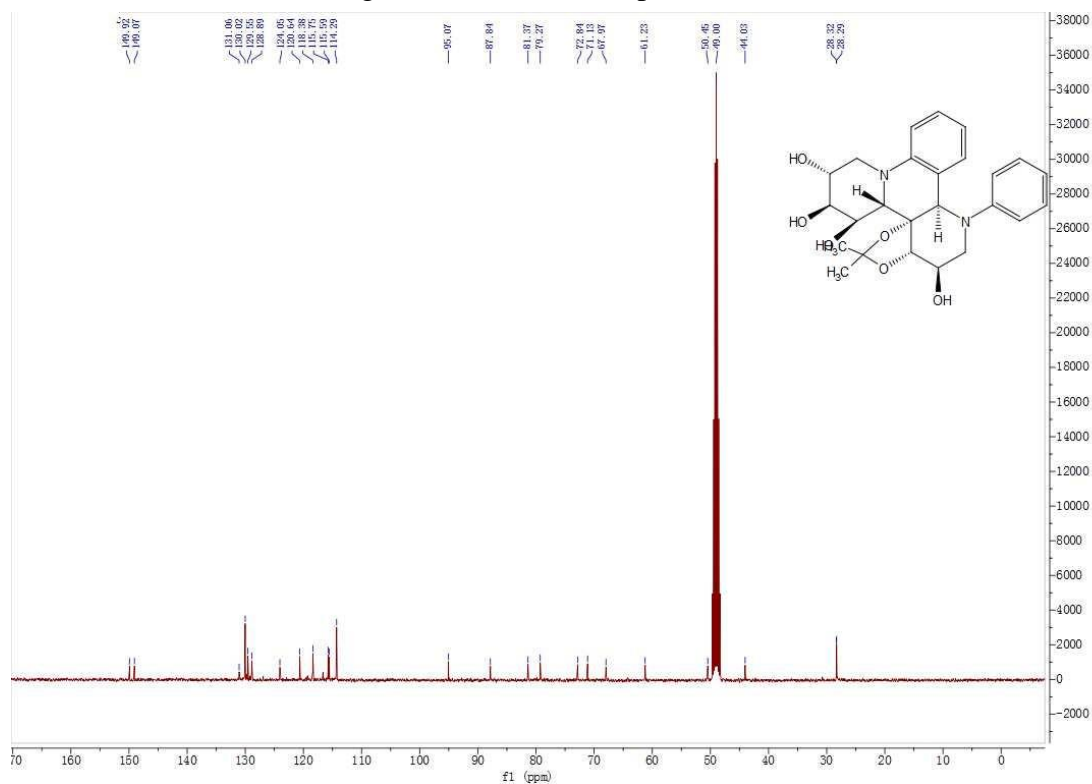

Fig.79  $^{13}\text{C}$  NMR of compound 7a-1'

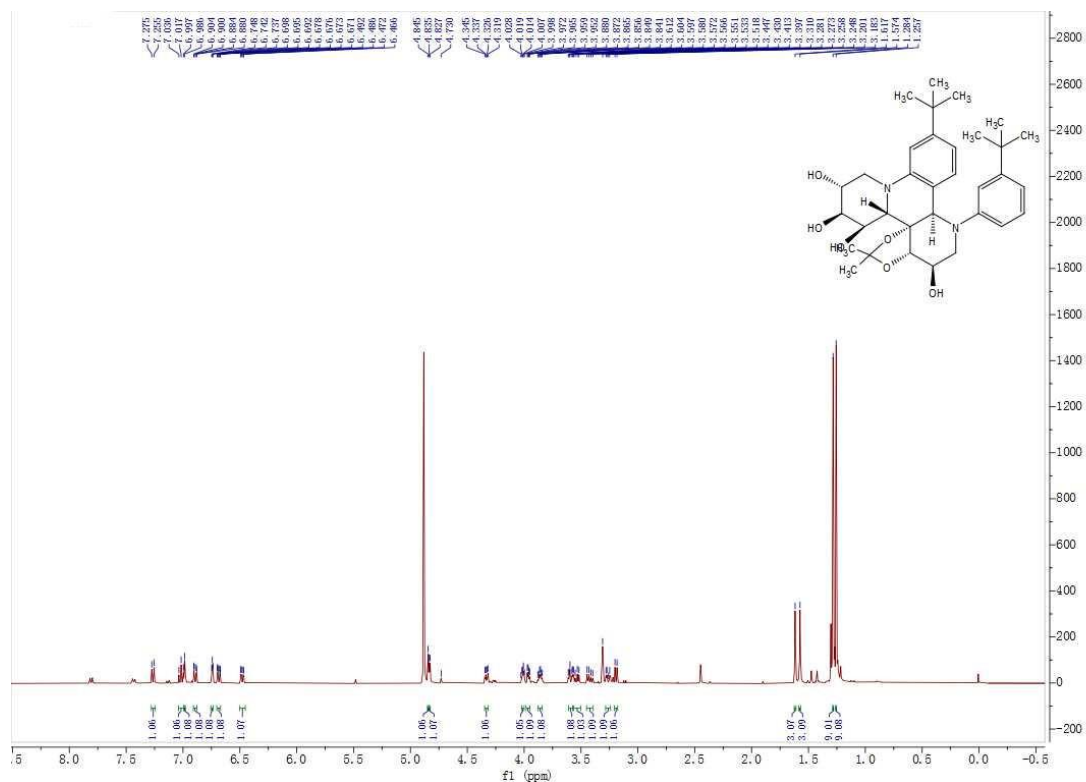

Fig.80 <sup>1</sup>H NMR of compound 7e-1'

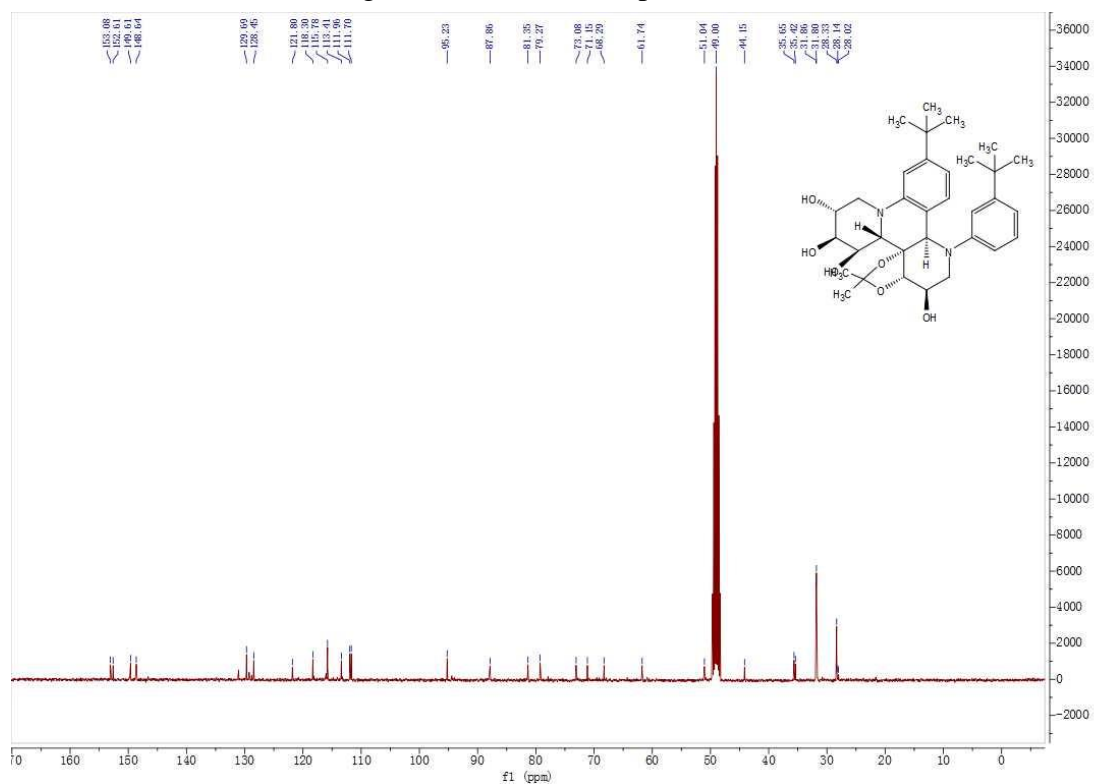

Fig.81 <sup>13</sup>C NMR of compound 7e-1'

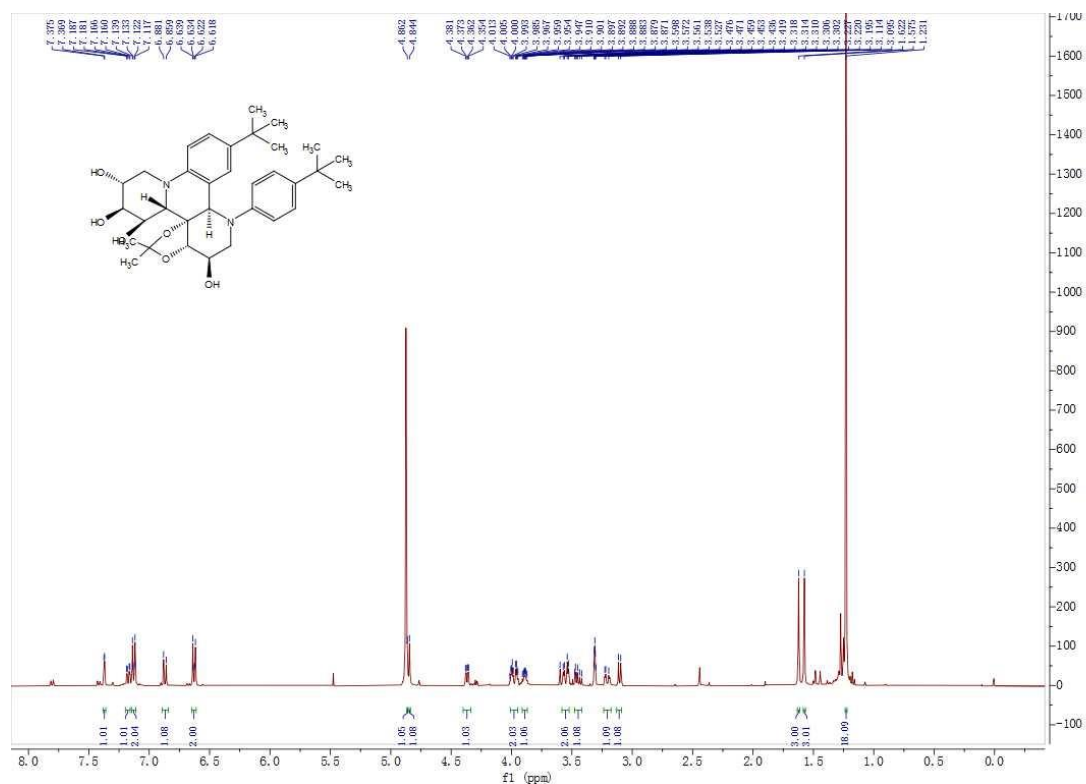

Fig.82 <sup>1</sup>H NMR of compound 7f-1'

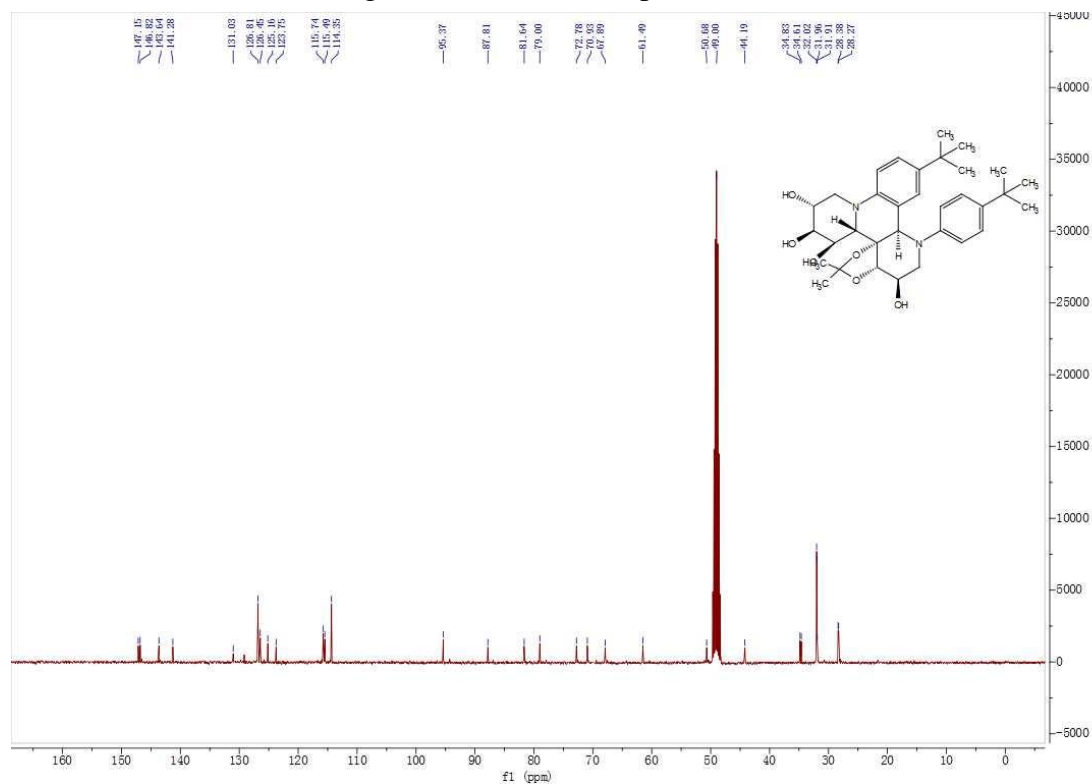

Fig.83 <sup>13</sup>C NMR of compound 7f-1'

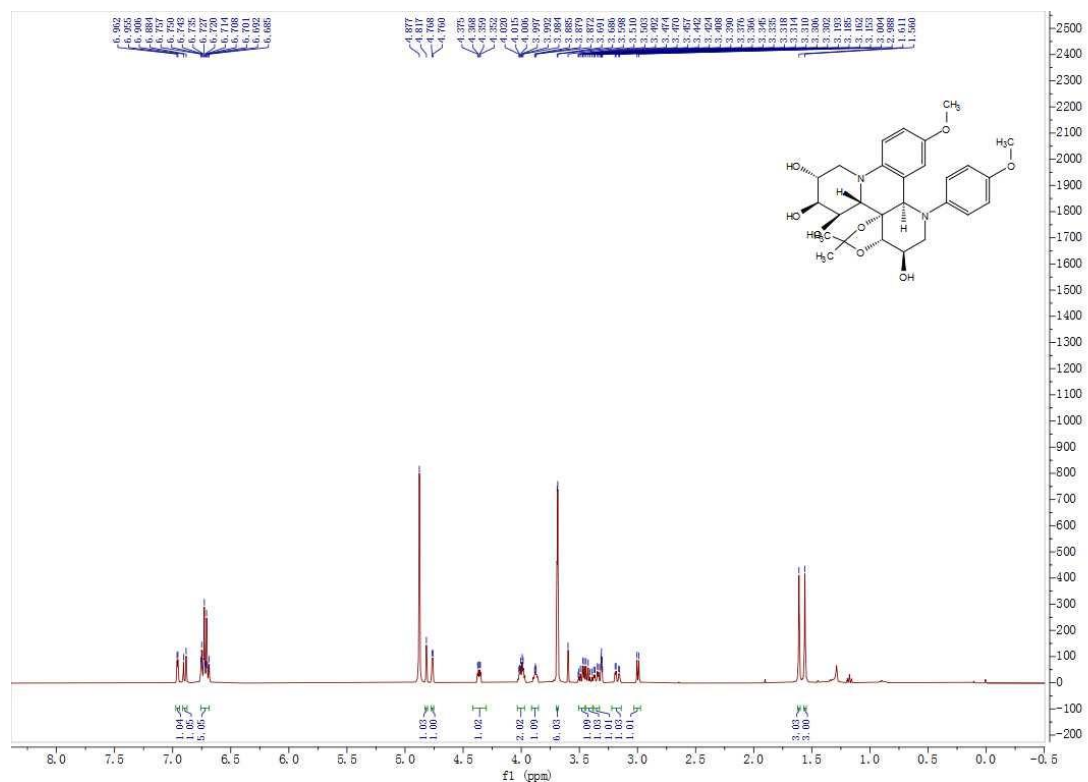



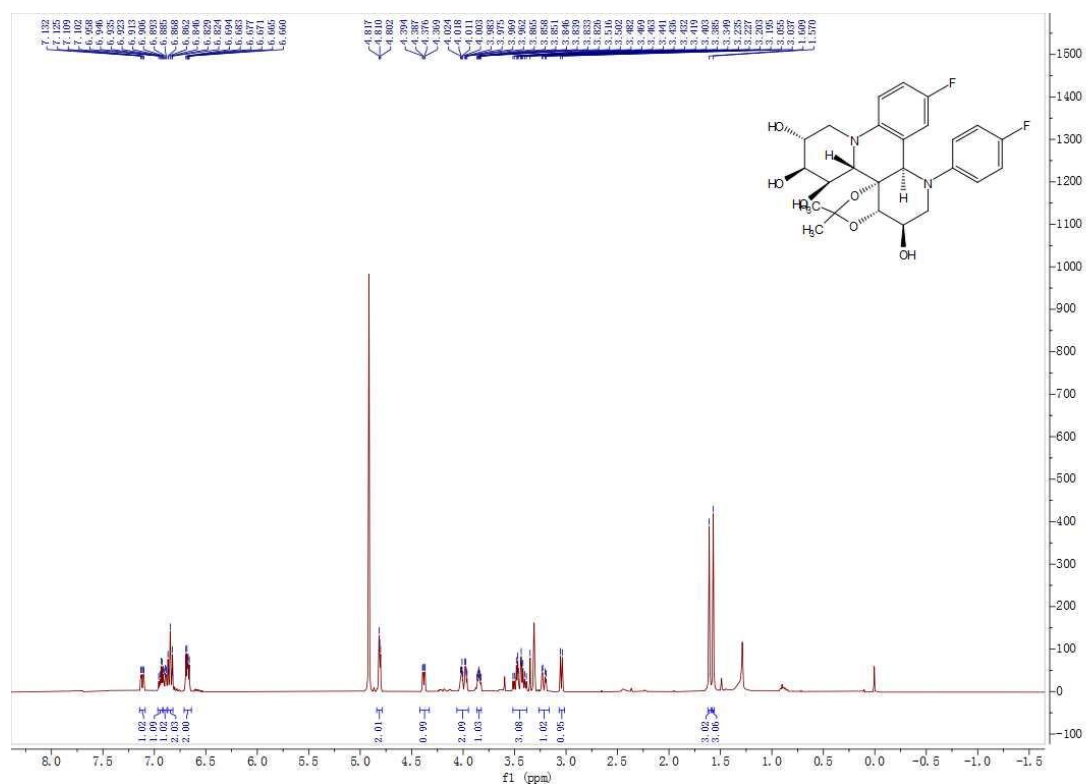

Fig.86  $^1\text{H}$  NMR of compound 71-1'

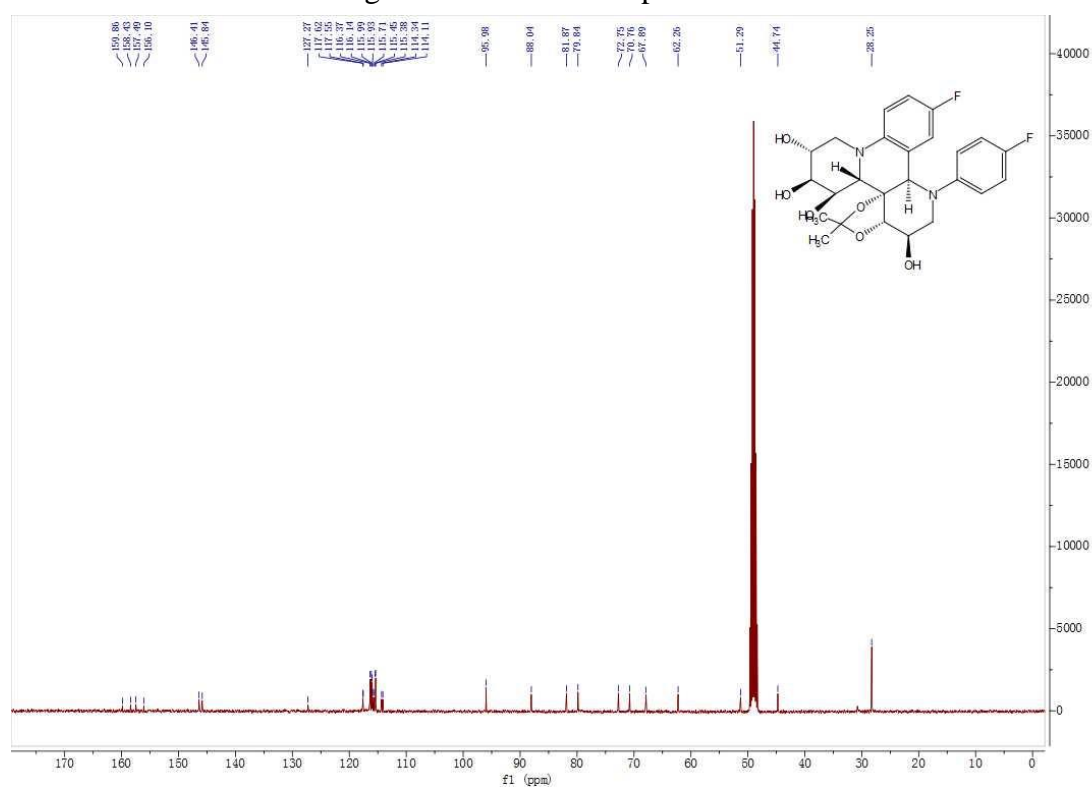

Fig.87  $^{13}\text{C}$  NMR of compound 71-1'

Fig S2:2D NMR analysis spectra

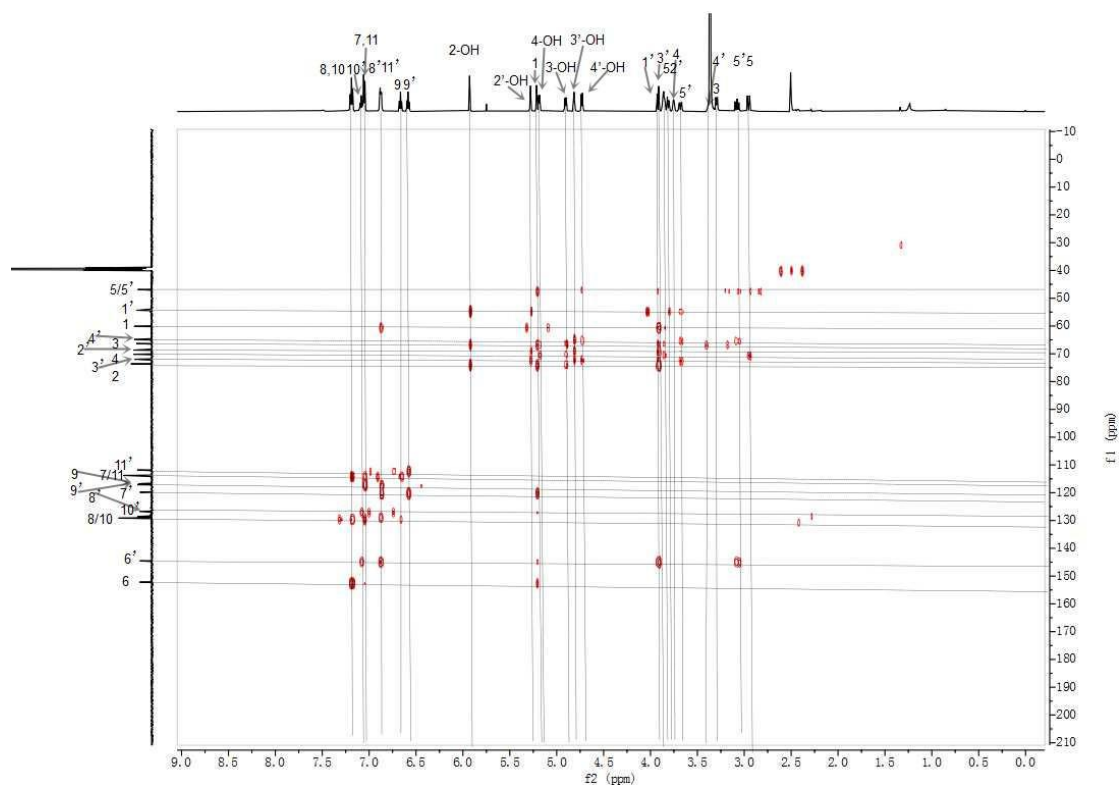

Fig.88  $^1\text{H}$ - $^{13}\text{C}$  HMBC NMR of compound 5a

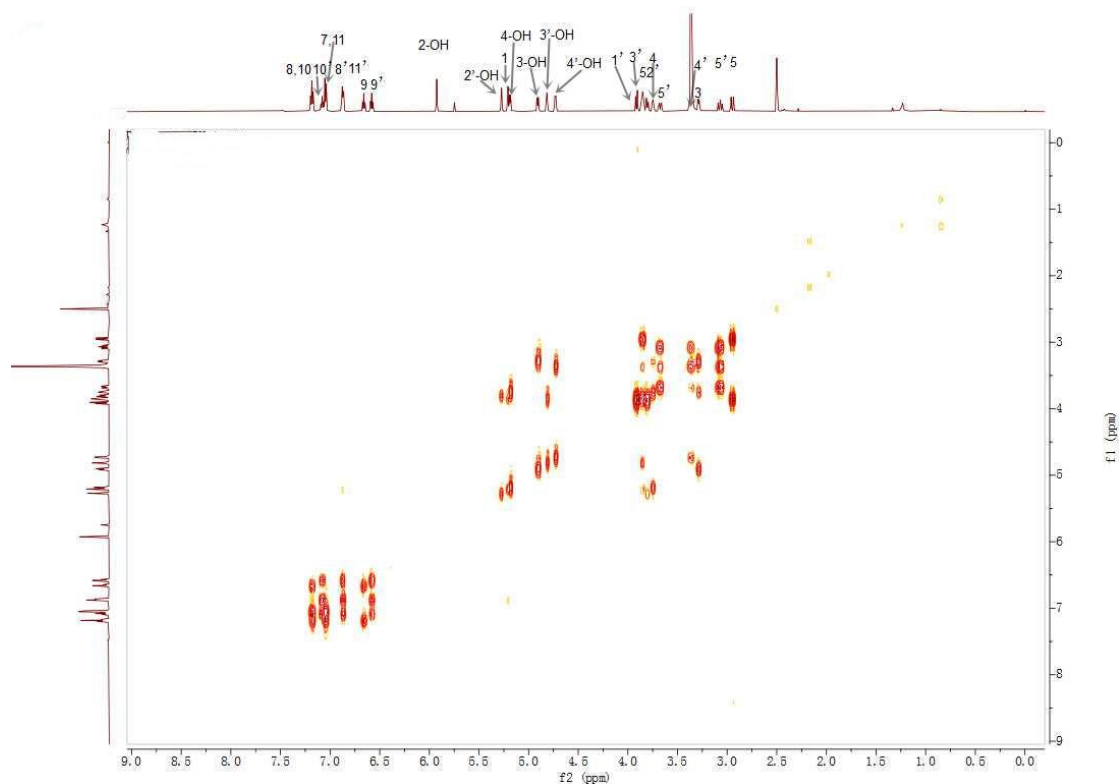

Fig.89  $^1\text{H}$ - $^1\text{H}$  COSY NMR of compound 5a

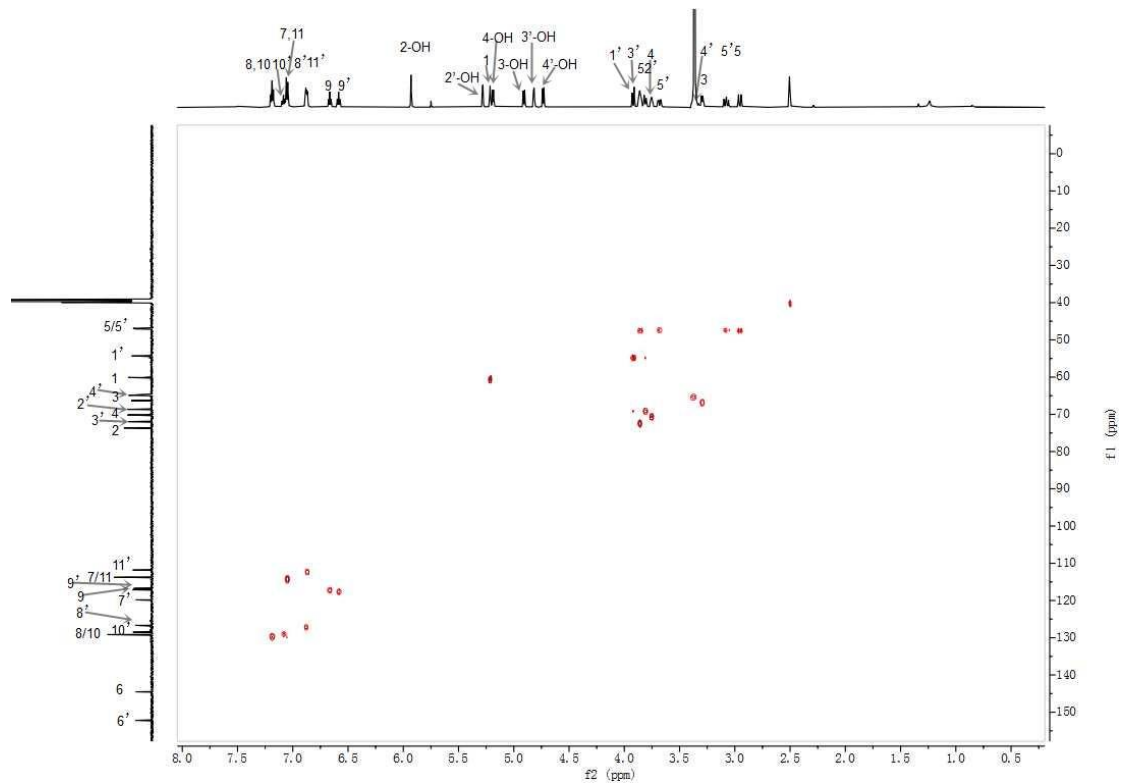

Fig.90  $^1\text{H}$ - $^{13}\text{C}$  HSQC NMR of compound **5a**

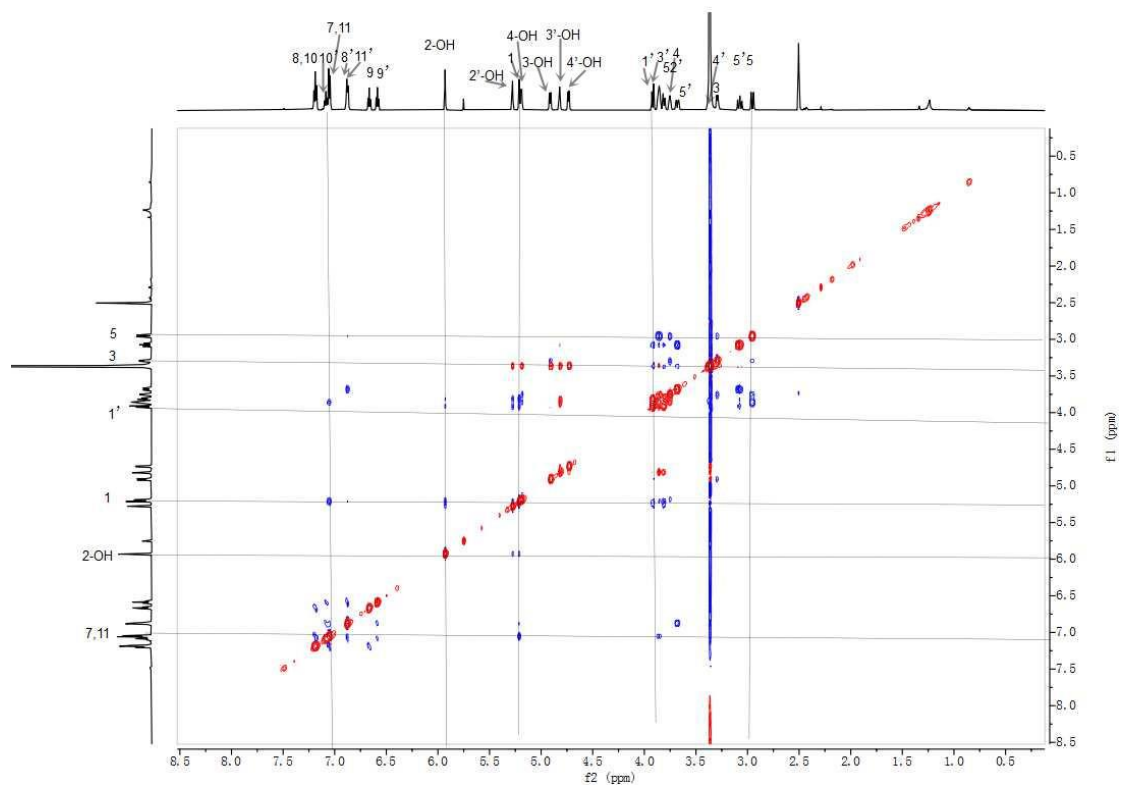

Fig.91  $^1\text{H}$ - $^1\text{H}$  ROESY NMR of compound **5a**

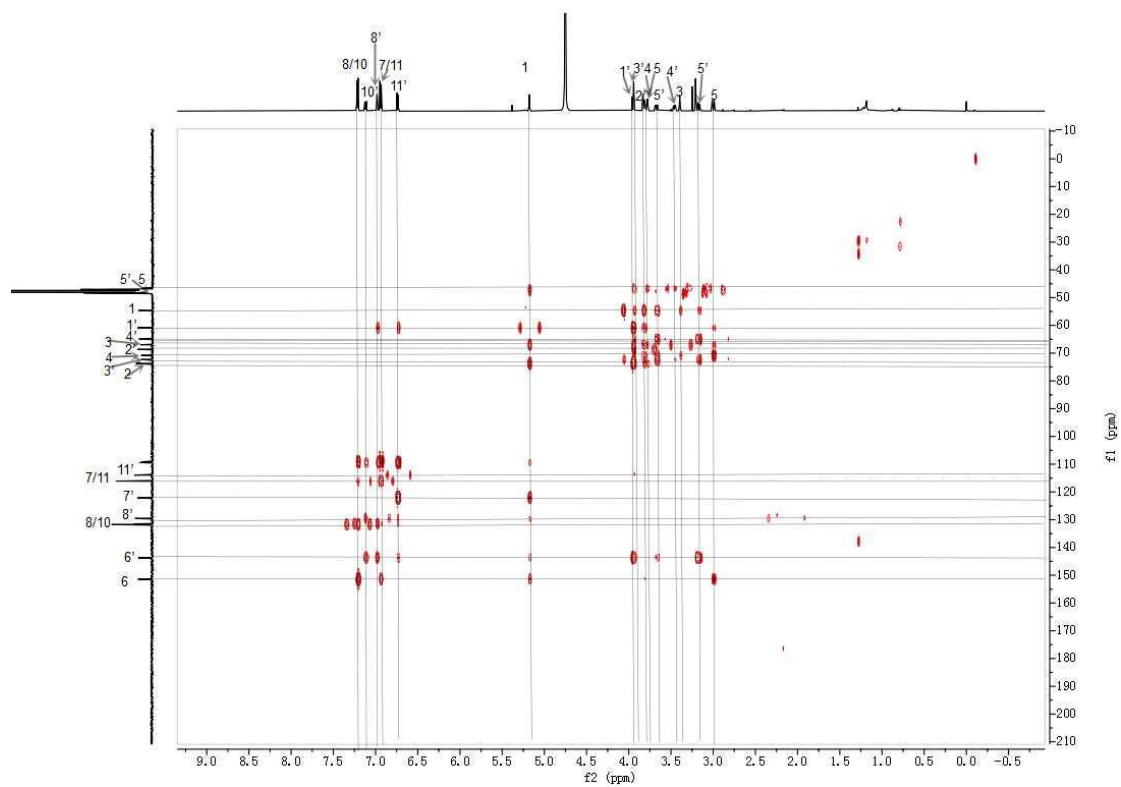

Fig.92  $^1\text{H}$ - $^{13}\text{C}$  HMBC NMR of compound **5q**

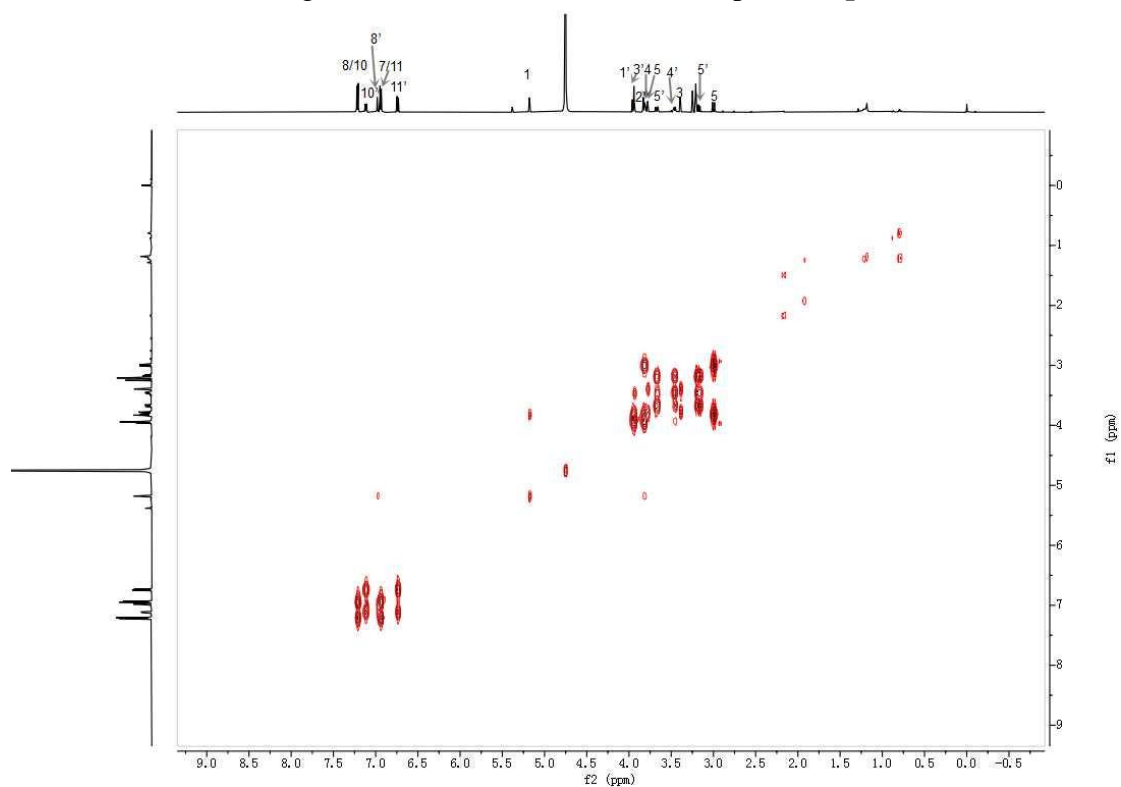

Fig.93  $^1\text{H}$ - $^1\text{H}$  COSY NMR of compound **5q**

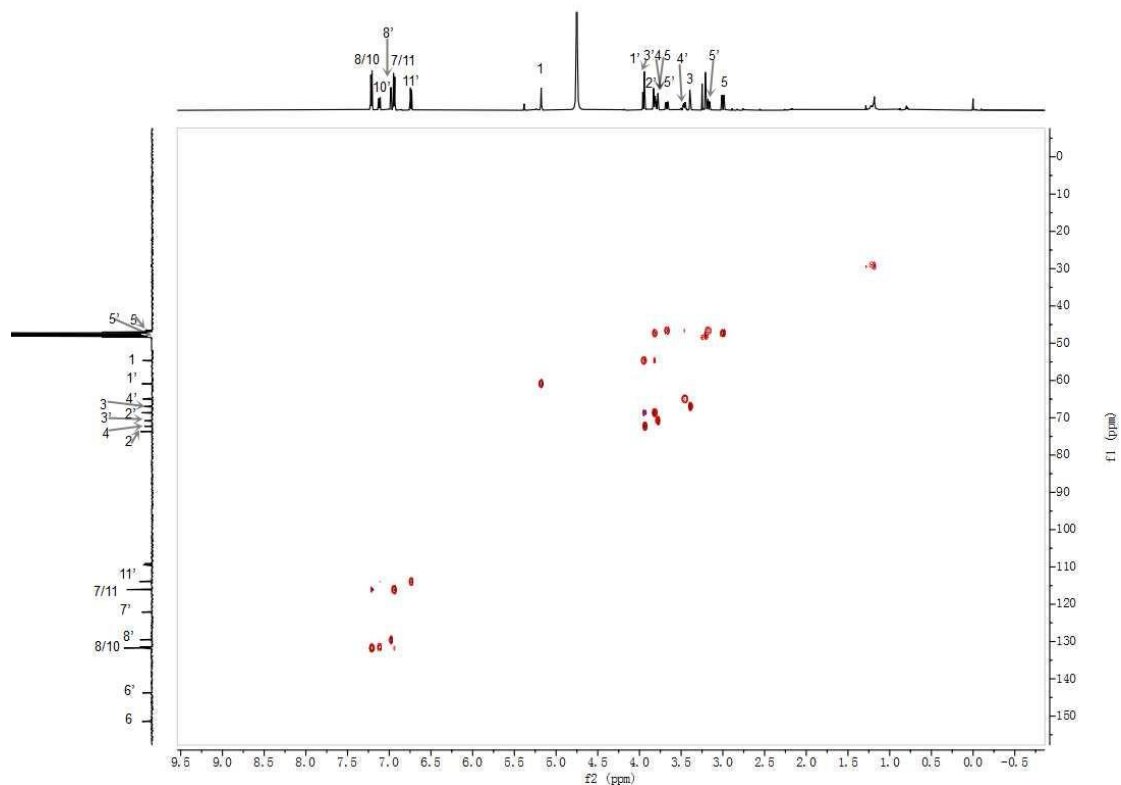

Fig.94  $^1\text{H}$ - $^{13}\text{C}$  HSQC NMR of compound **5q**

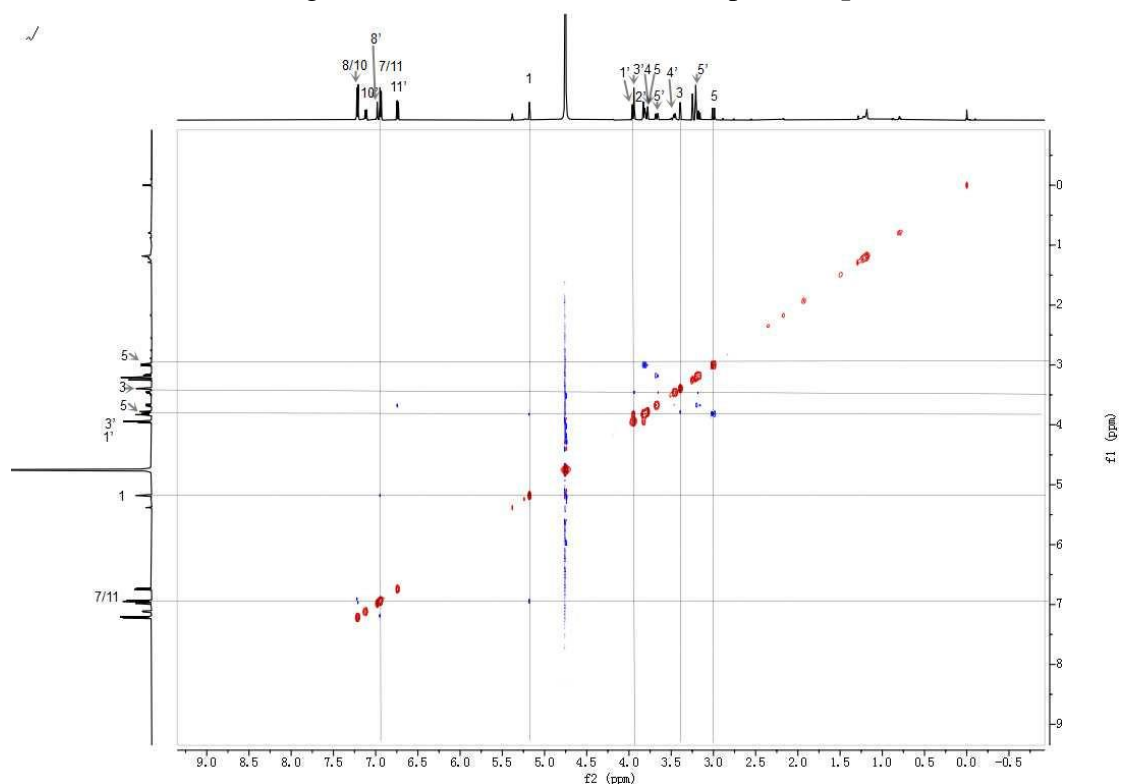

Fig.95  $^1\text{H}$ - $^1\text{H}$  ROESY NMR of compound **5q**

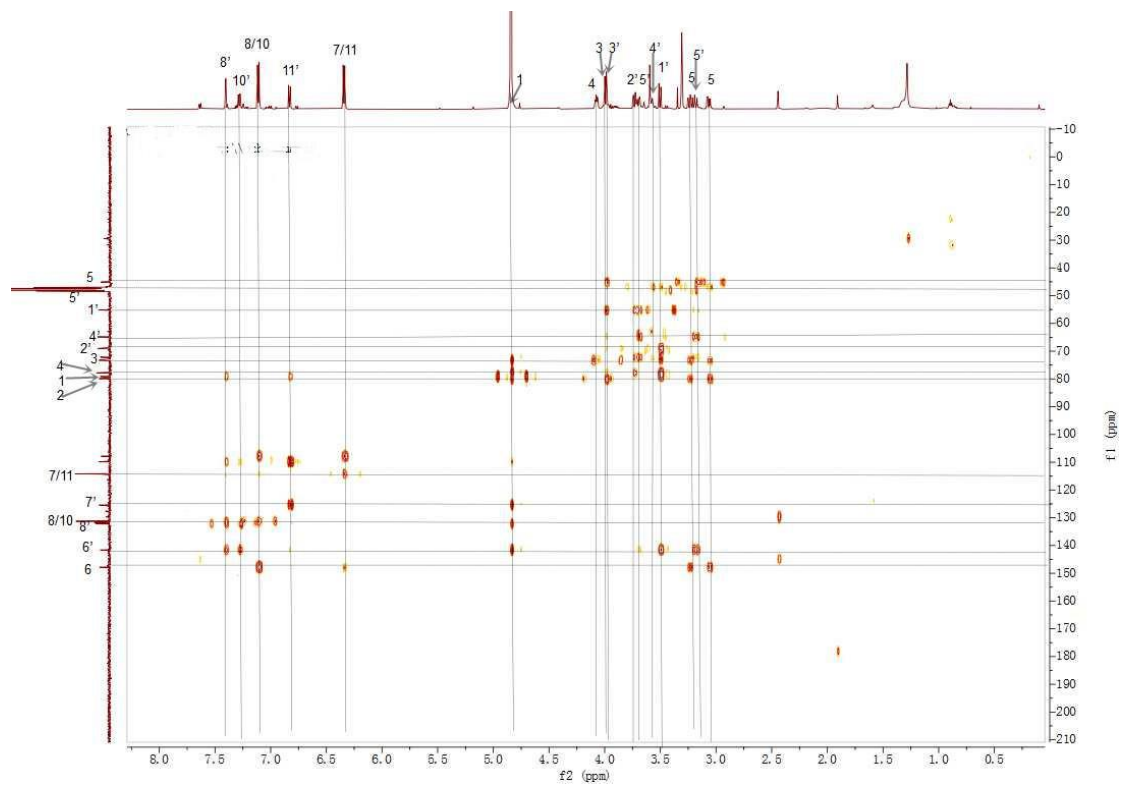

Fig.96  $^1\text{H}$ - $^{13}\text{C}$  HMBC NMR of compound **5q-1**

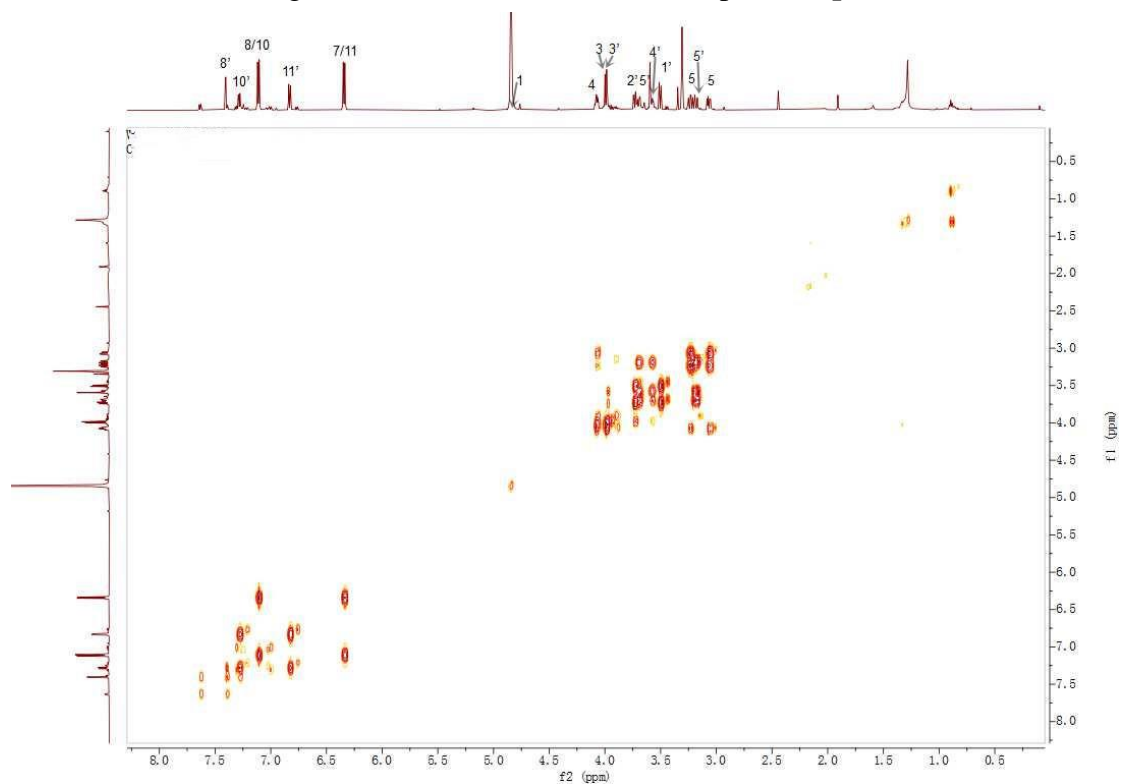

Fig.97  $^1\text{H}$ - $^1\text{H}$  COSY NMR of compound **5q-1**

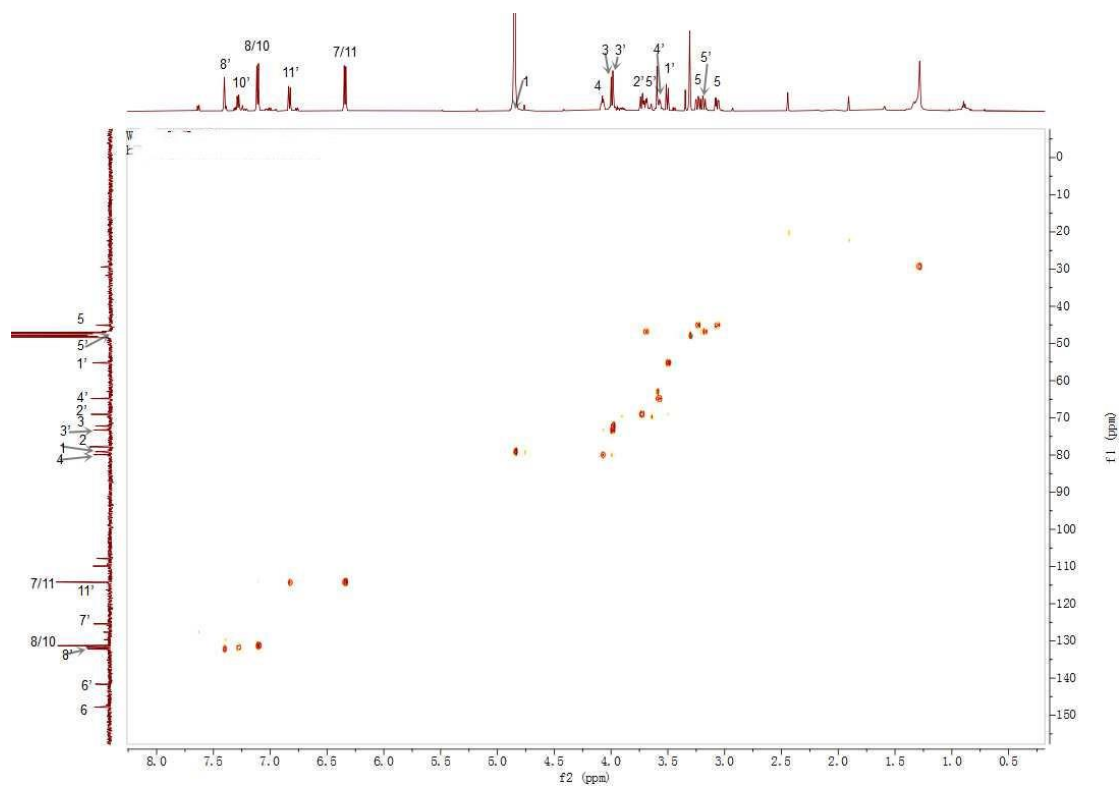

Fig.98  $^1\text{H}$ - $^{13}\text{C}$  HSQC NMR of compound **5q-1**

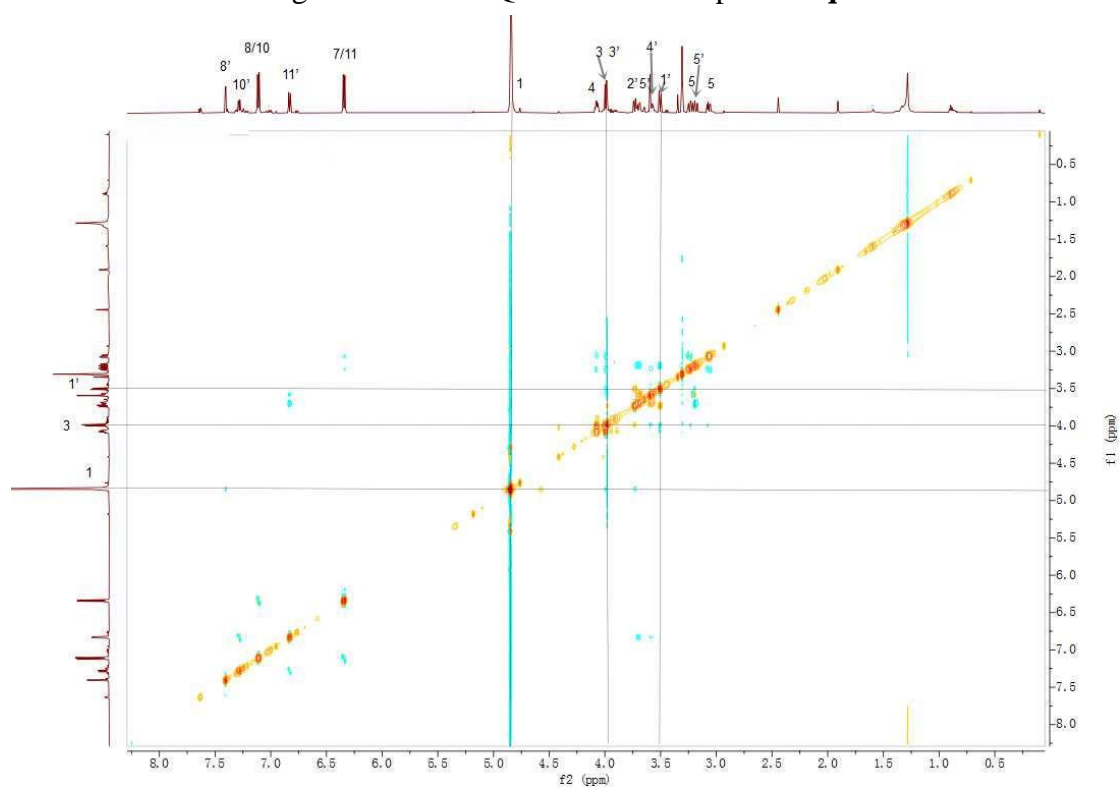

Fig.99  $^1\text{H}$ - $^1\text{H}$  ROESY NMR of compound **5q-1**

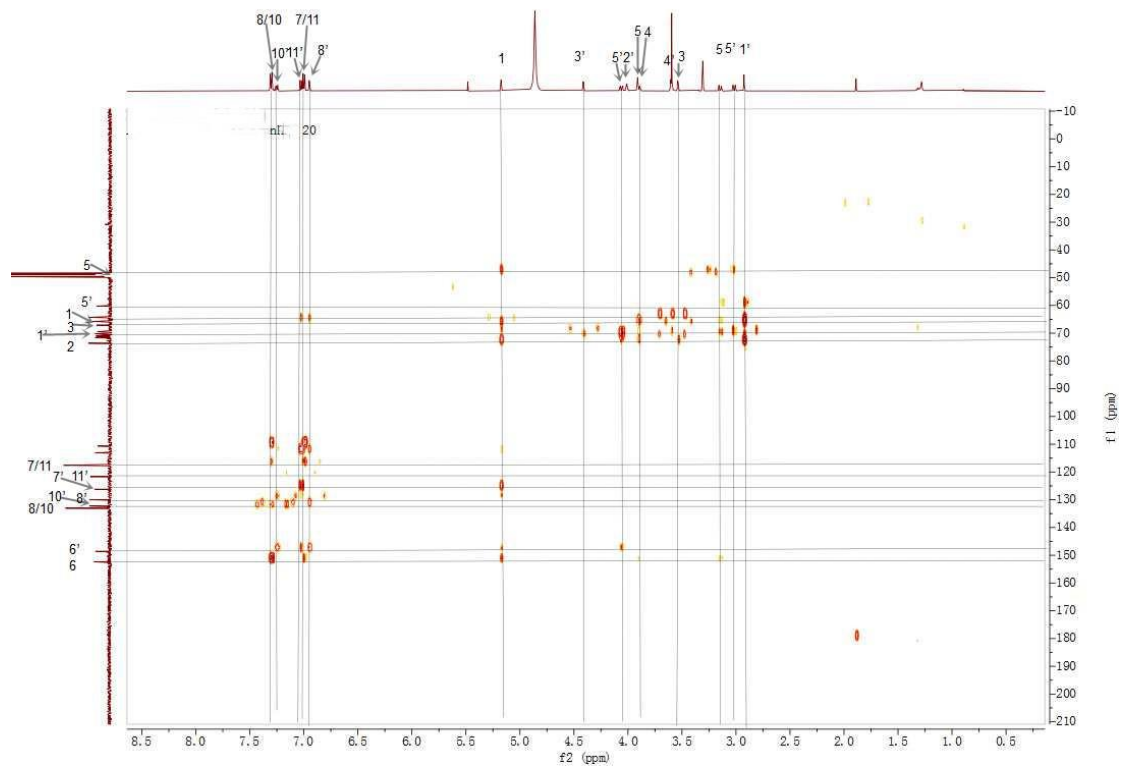

Fig.100  $^1\text{H}$ - $^{13}\text{C}$  HMBC NMR of compound **5q-2**

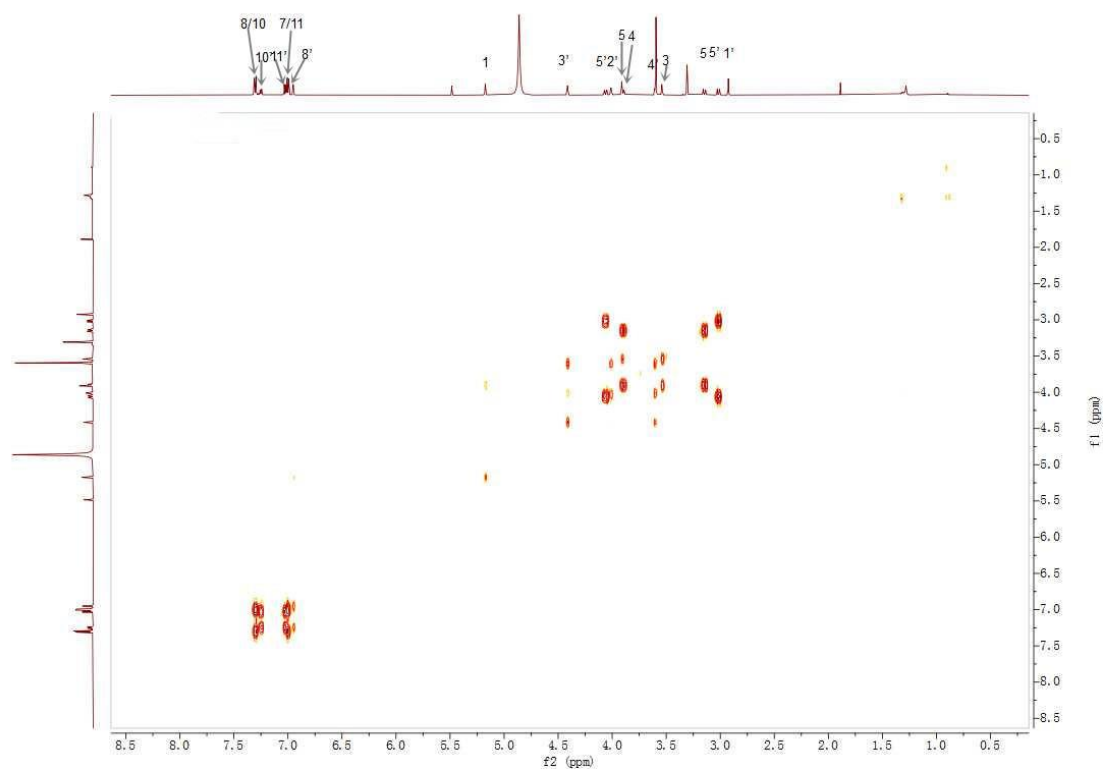

Fig.101  $^1\text{H}$ - $^1\text{H}$  COSY NMR of compound **5q-2**



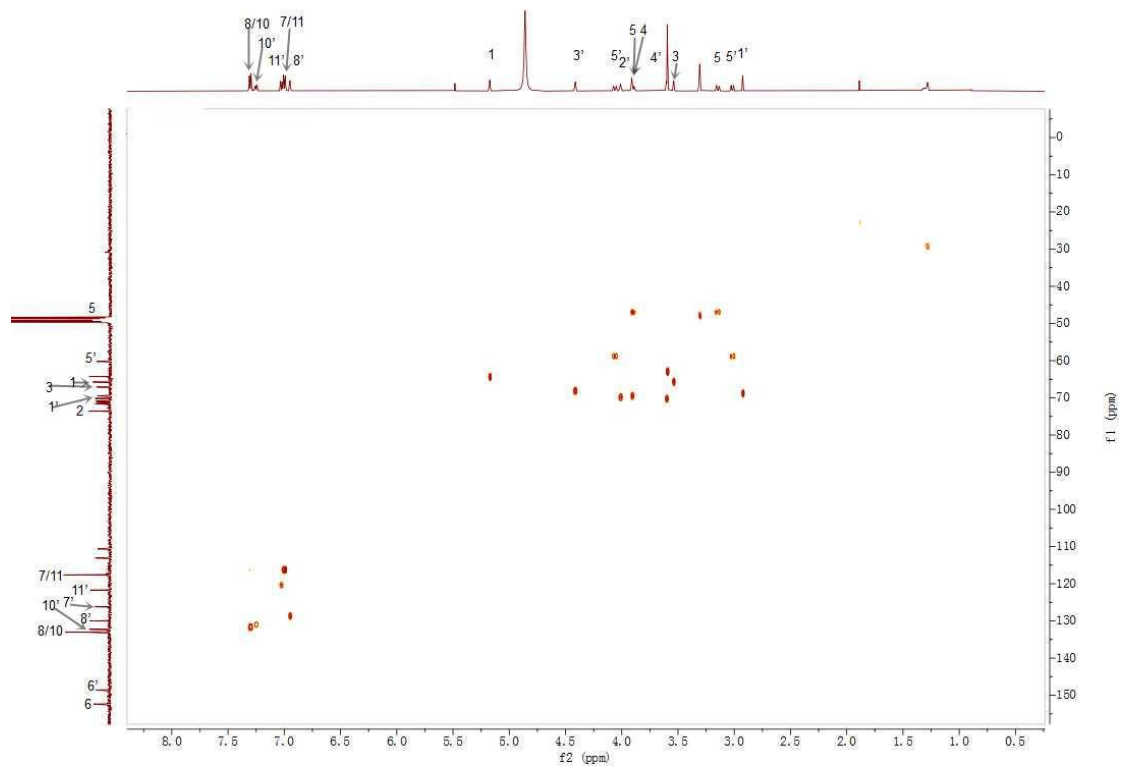

Fig.102  $^1\text{H}$ - $^{13}\text{C}$  HSQC NMR of compound **5q-2**

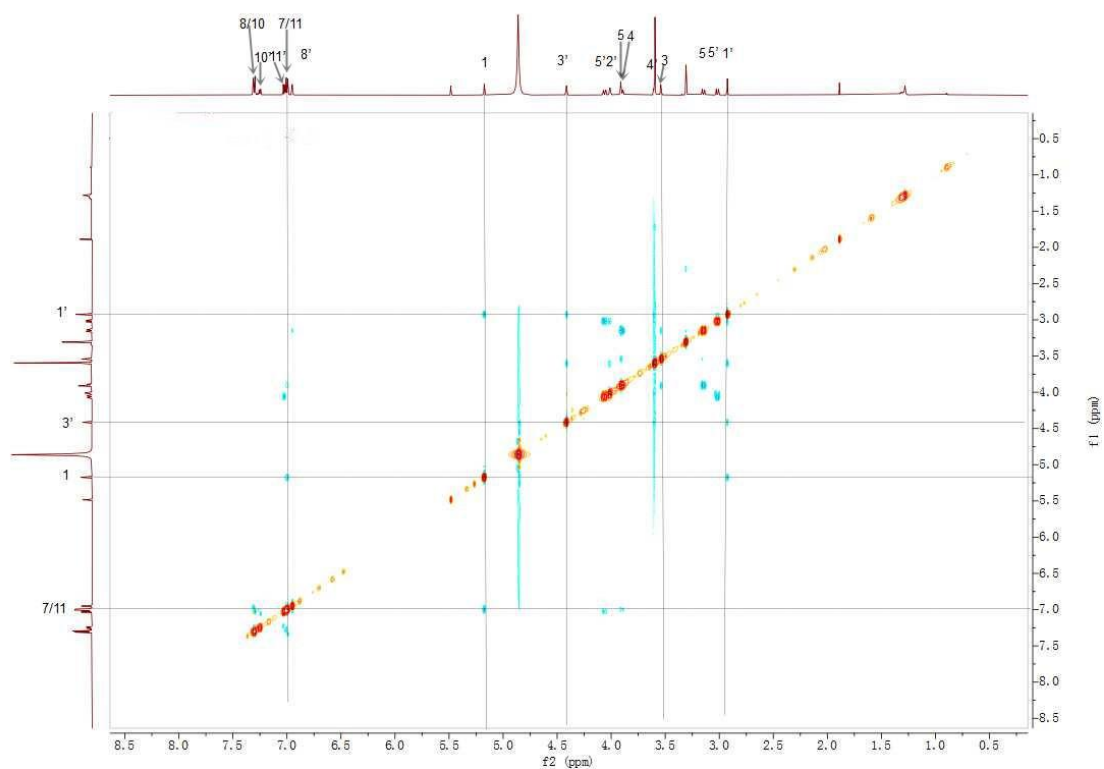

Fig.103  $^1\text{H}$ - $^1\text{H}$  ROESY NMR of compound **5q-2**

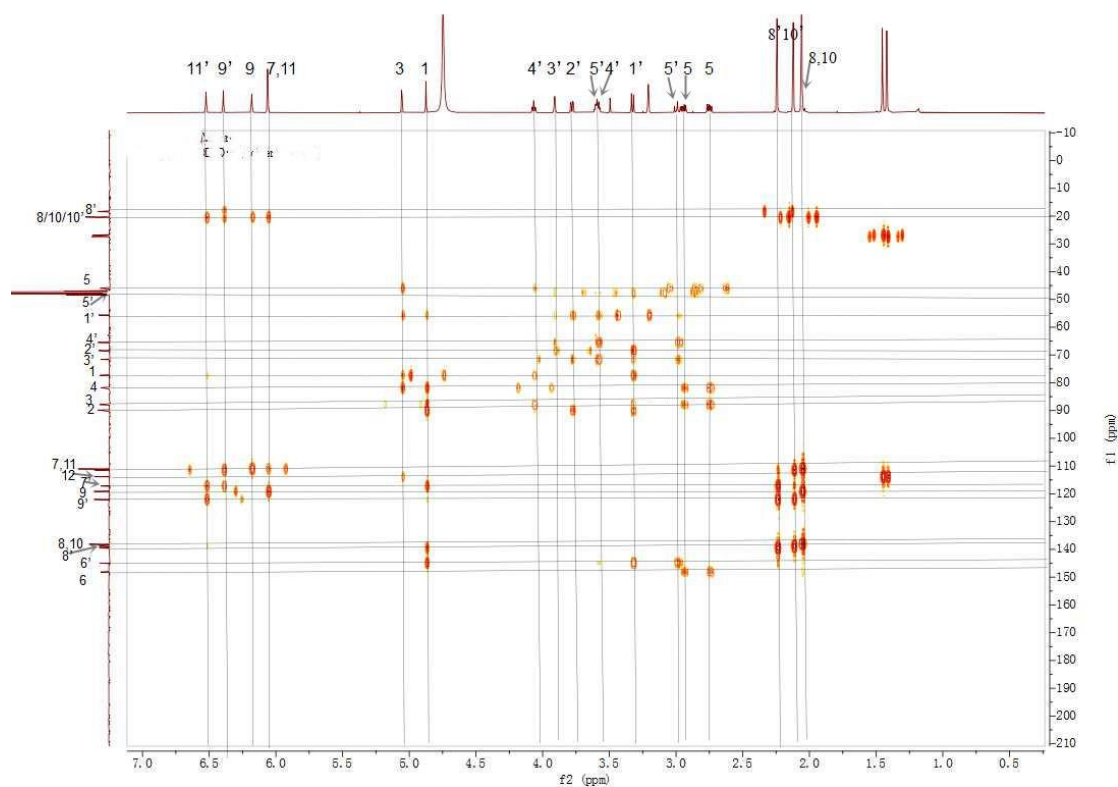

Fig.104  $^1\text{H}$ - $^{13}\text{C}$  HMBC NMR of compound **5t'**

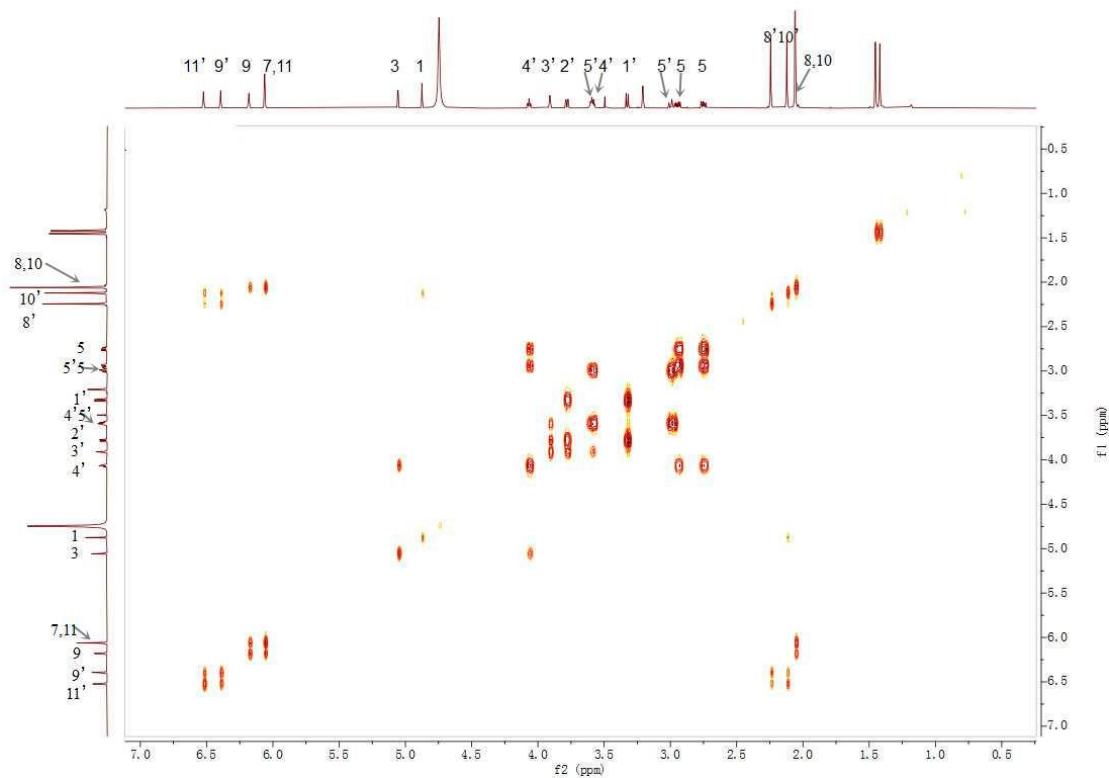

Fig.105  $^1\text{H}$ - $^1\text{H}$  COSY NMR of compound **5t'**

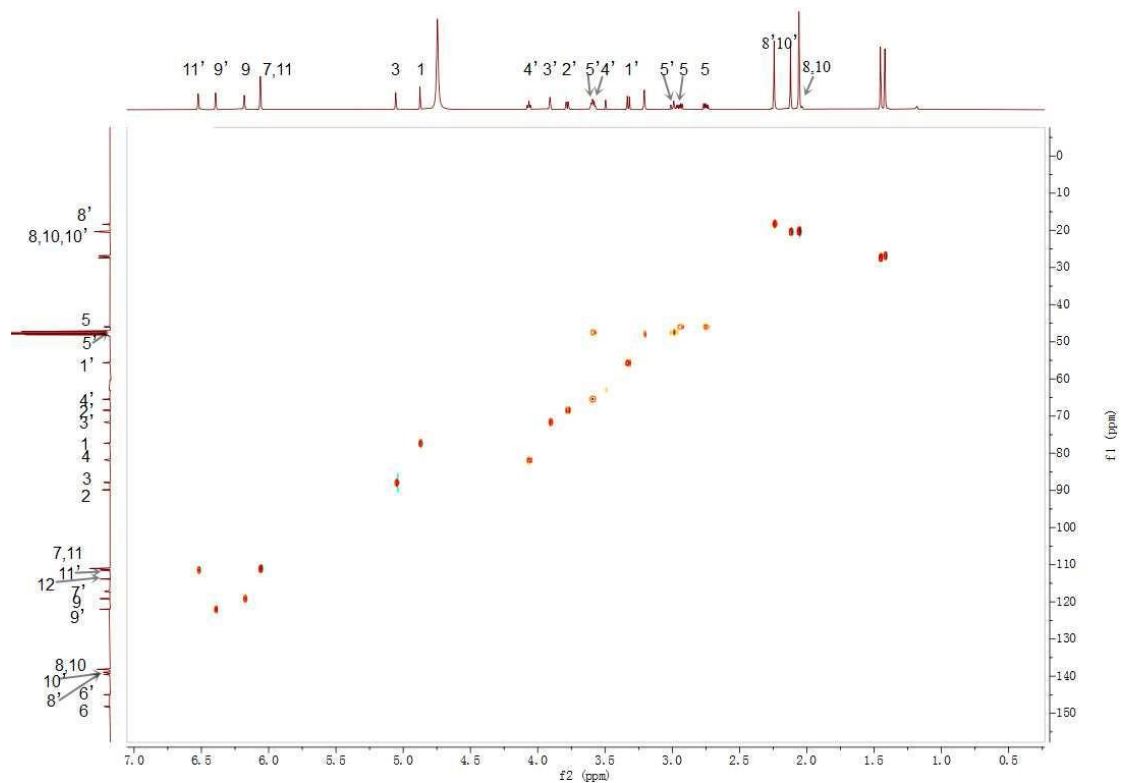

Fig.106  $^1\text{H}$ - $^{13}\text{C}$  HSQC NMR of compound **5t'**

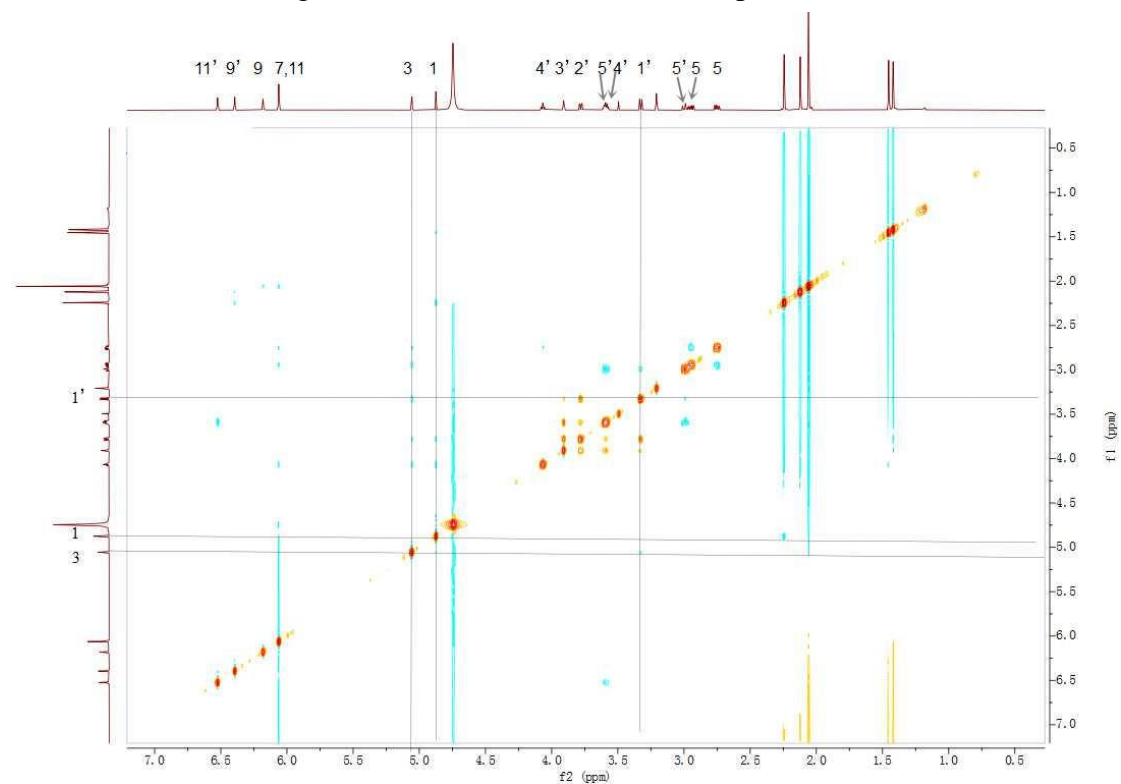

Fig.107  $^1\text{H}$ - $^1\text{H}$  ROESY NMR of compound **5t'**

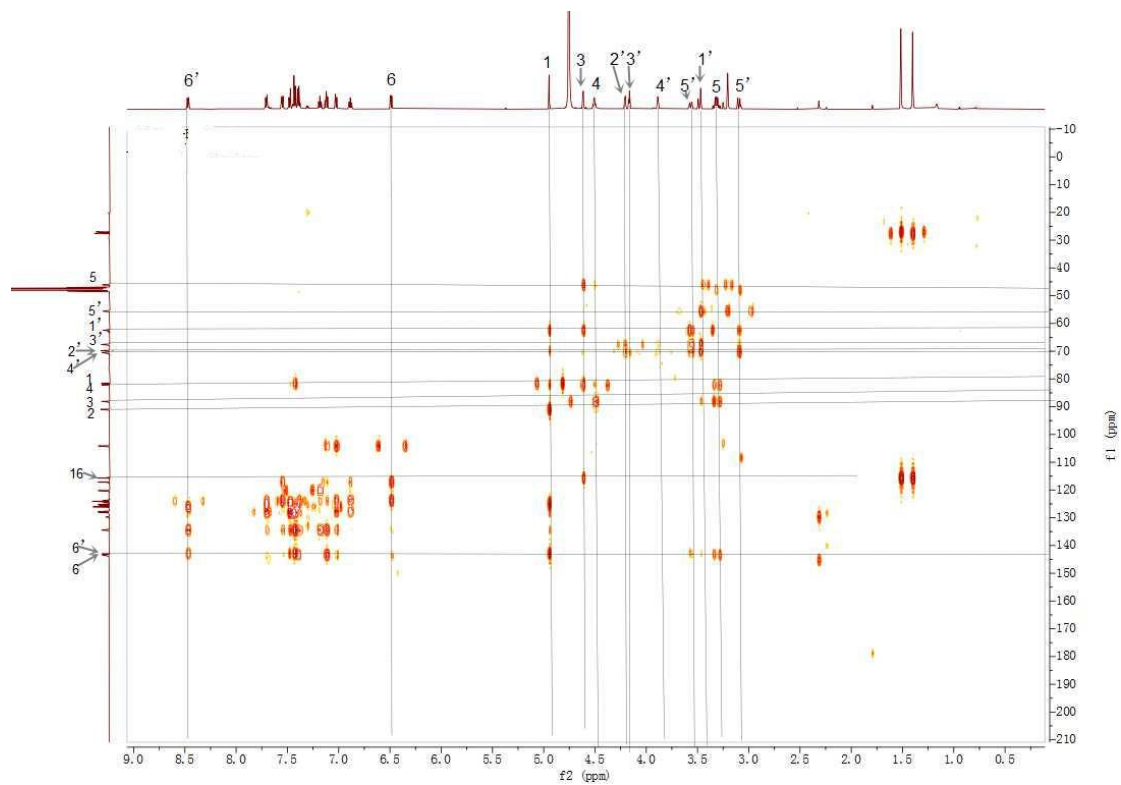

Fig.108  $^1\text{H}$ - $^{13}\text{C}$  HMBC NMR of compound **6w'**

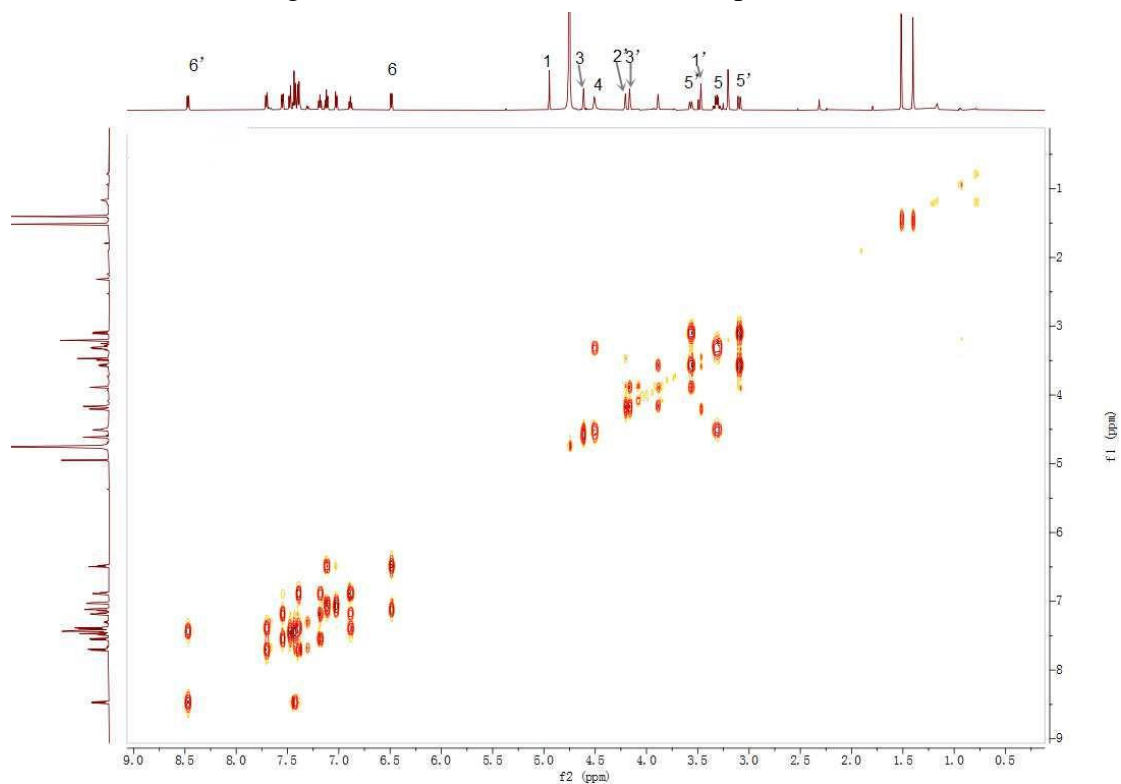

Fig.109  $^1\text{H}$ - $^1\text{H}$  COSY NMR of compound **6w'**

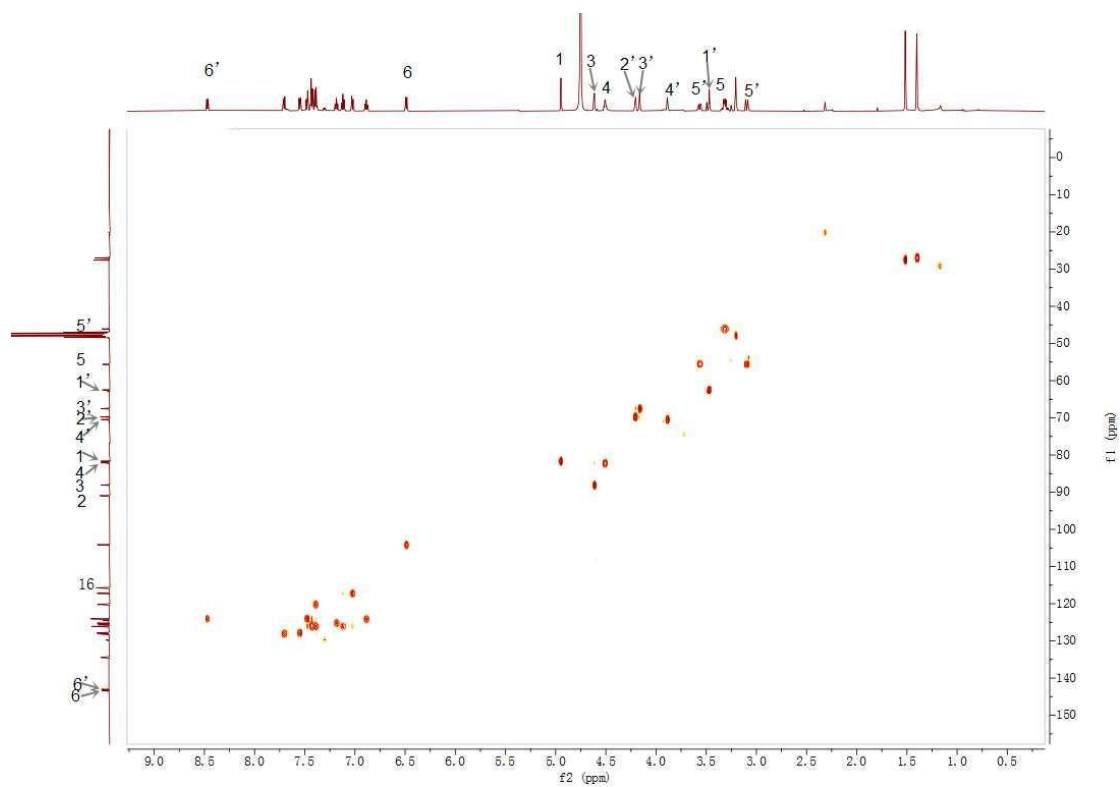

Fig.110  $^1\text{H}$ - $^{13}\text{C}$  HSQC NMR of compound **6w'**

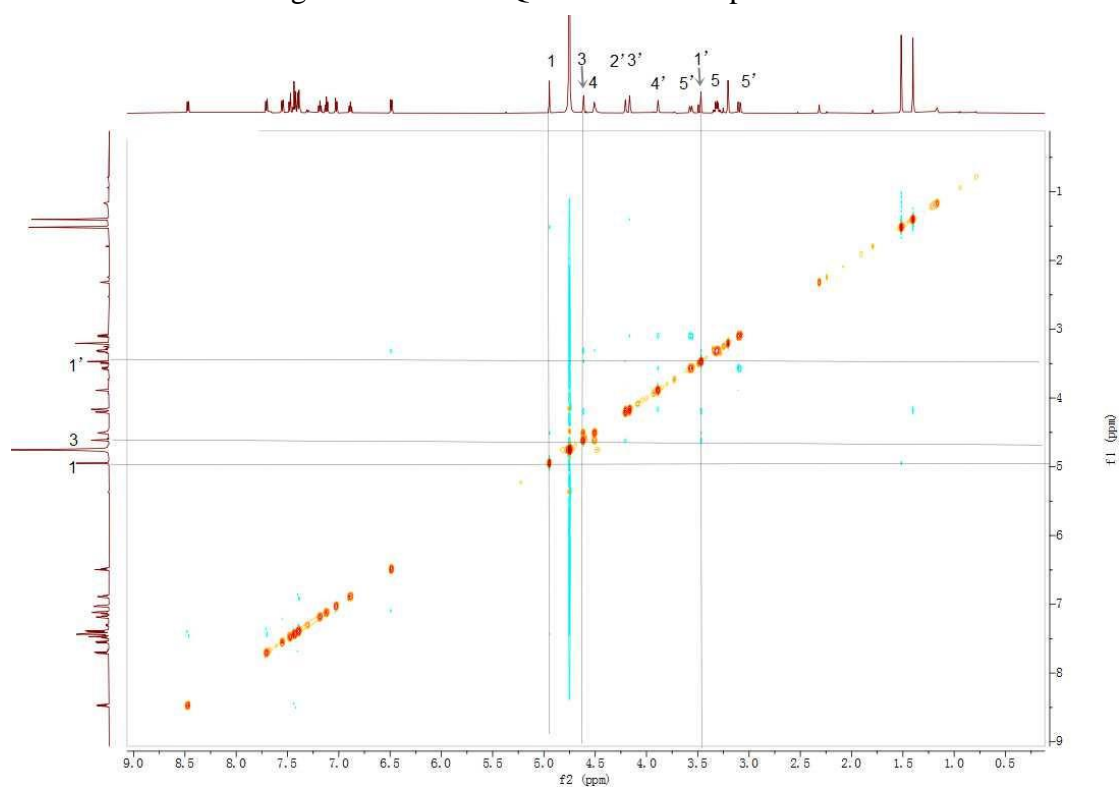

Fig.111  $^1\text{H}$ - $^1\text{H}$  ROESY NMR of compound **6w'**

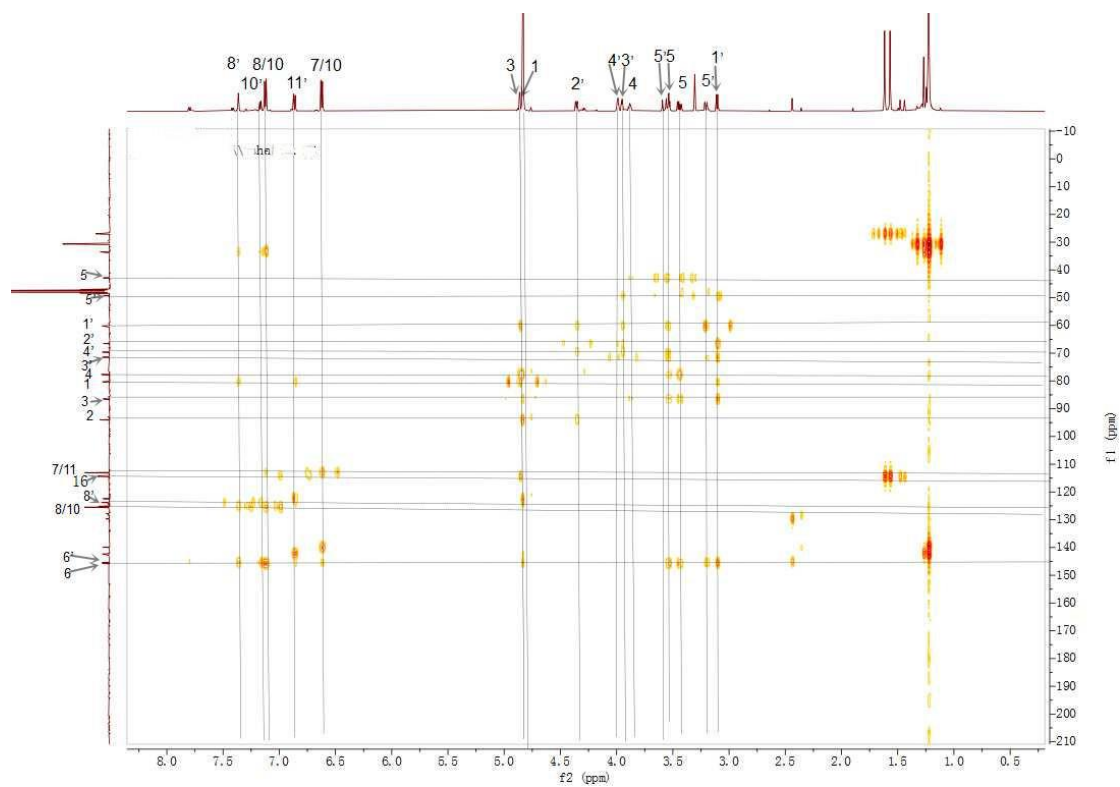

Fig.112  $^1\text{H}$ - $^{13}\text{C}$  HMBC NMR of compound **7f-1'**

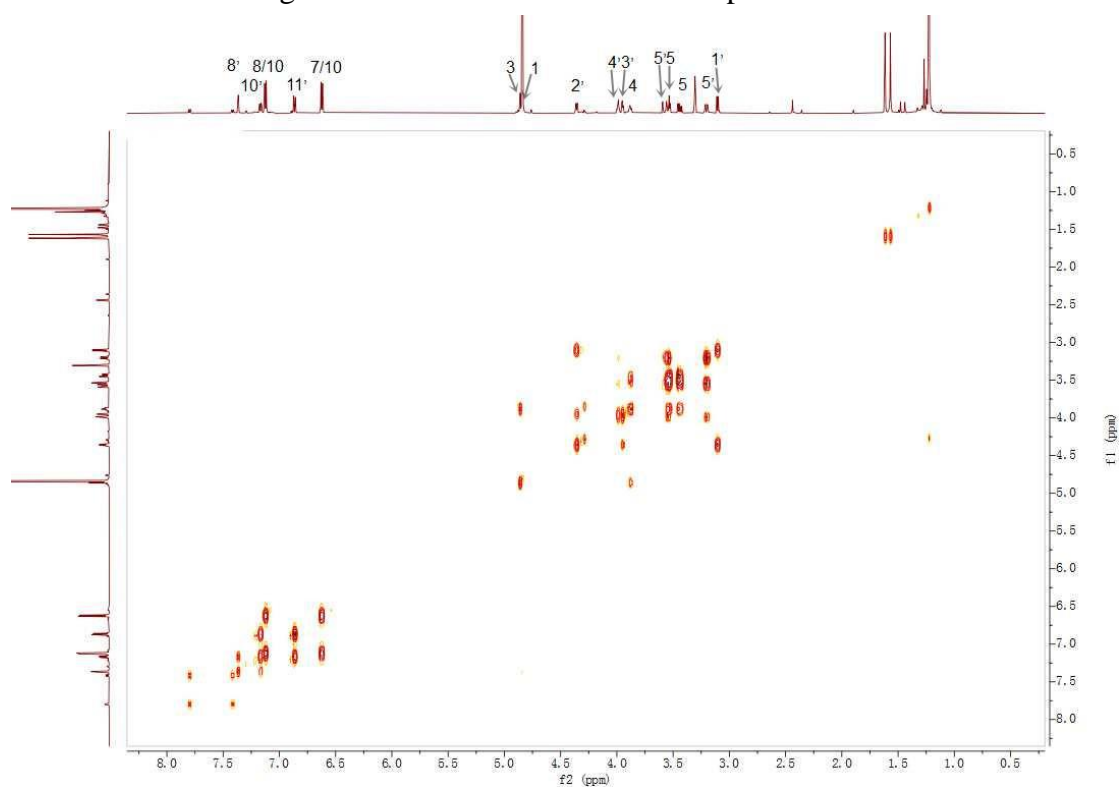

Fig.113  $^1\text{H}$ - $^1\text{H}$  COSY NMR of compound **7f-1'**

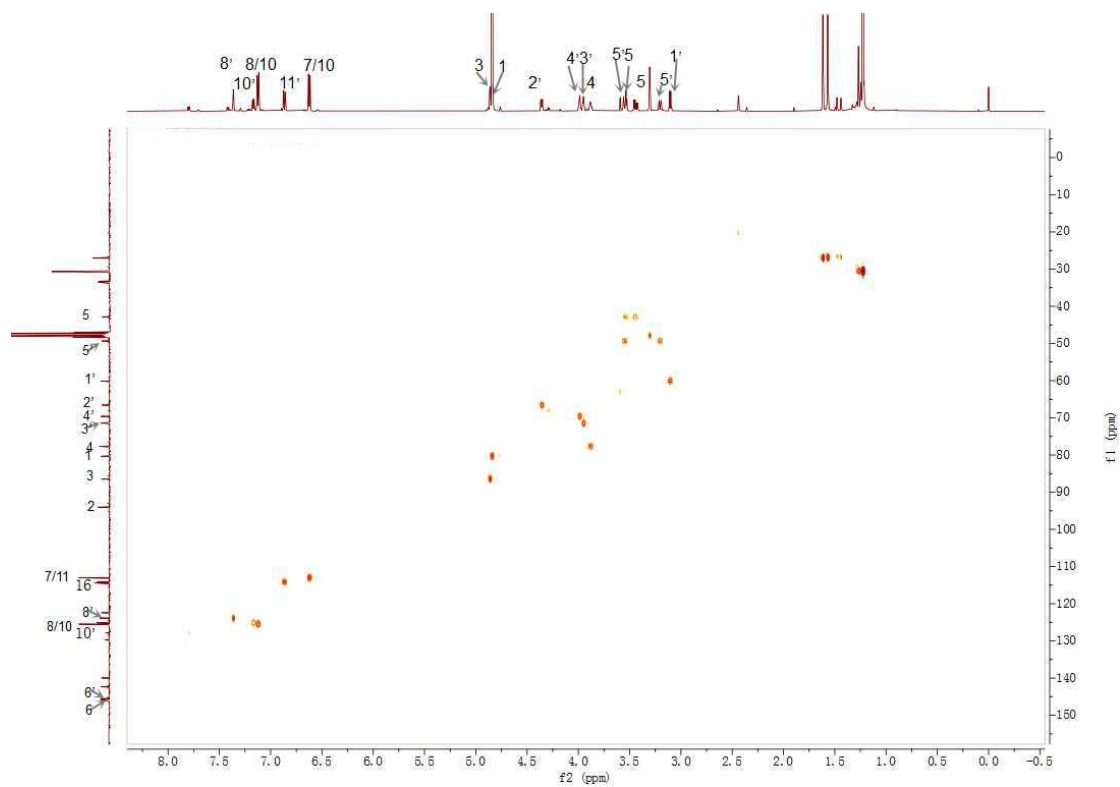

Fig.114  $^1\text{H}$ - $^{13}\text{C}$  HSQC NMR of compound **7f-1'**

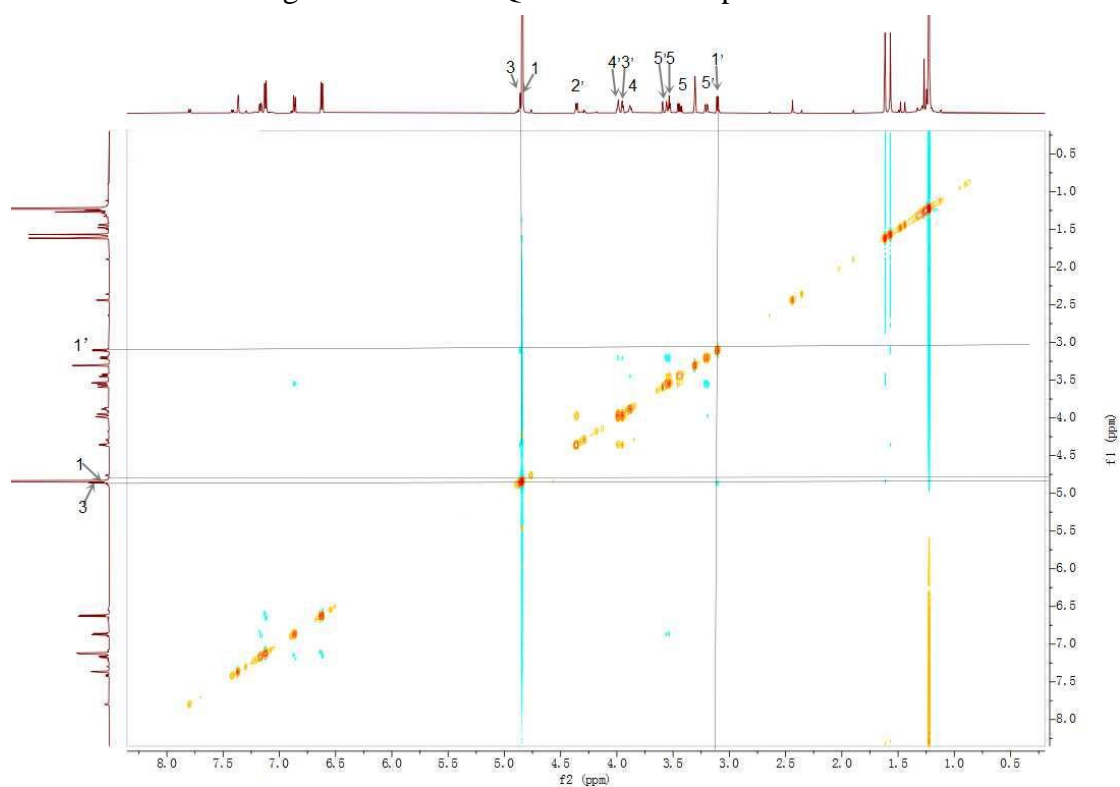

Fig.115  $^1\text{H}$ - $^1\text{H}$  ROESY NMR of compound **7f-1'**

**Fig S3 and S4: Key HMBC (C→H) and ROESY (H↔H) correlations**

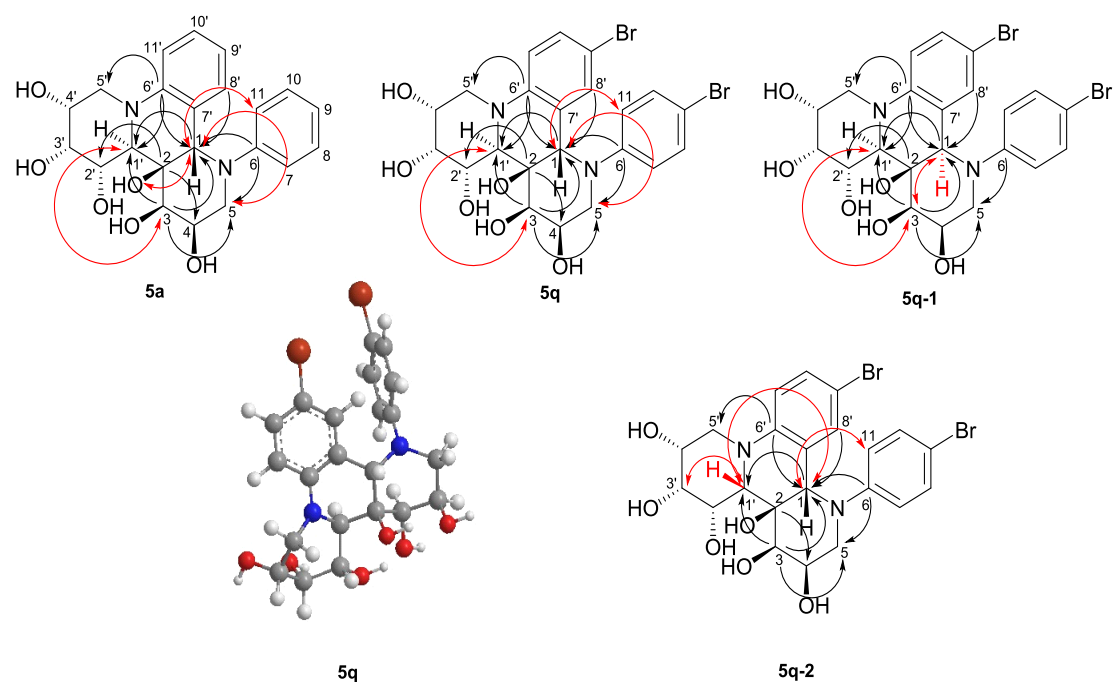

**Fig. S3** Key HMBC (C→H) and ROESY (H↔H) correlations of the complex fused iminosugars.

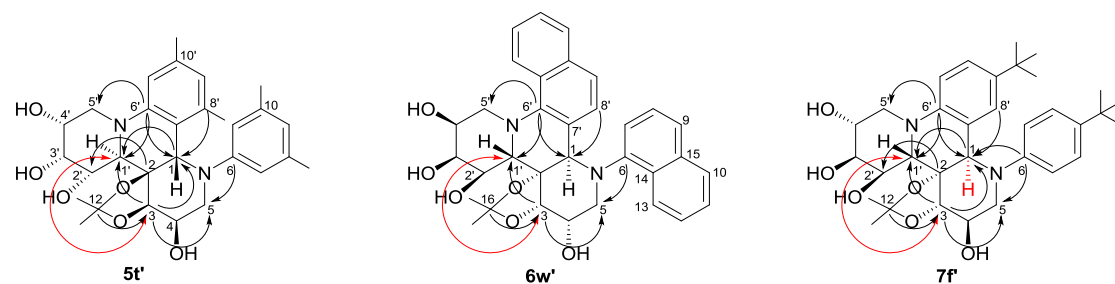

**Fig. S4** Key HMBC (C→H) and ROESY (H↔H) correlations of the isopropylidene protected iminosugars.

**Table S1** The related chemical shifts of C-1, C-1' and C-2 in **5q**, **5q-1**, **5q-2**, and **5q-3**

| Compounds  | <b>5q</b>                   | <b>5q-1</b>                  | <b>5q-2</b> | <b>5q-3</b>         |
|------------|-----------------------------|------------------------------|-------------|---------------------|
| 1-H (ppm)  | 5.28 s                      | 4.88 s                       | 5.18 s      | 4.84 s <sup>a</sup> |
| C-1 (ppm)  | 60.9                        | 79.1                         | 64.3        | - <sup>b</sup>      |
| 1'-H (ppm) | 4.07 d<br><i>J</i> = 7.6 Hz | 3.54 d<br><i>J</i> = 10.4 Hz | 2.93 s      | 2.93 s <sup>a</sup> |
| C-1' (ppm) | 54.6                        | 55.2                         | 71.2        | - <sup>b</sup>      |
| C-2 (ppm)  | 73.7                        | 77.8                         | 73.6        | - <sup>b</sup>      |

<sup>a</sup>Determined by the <sup>1</sup>H NMR of the mixture of **5q-1** and **5q-3**; <sup>b</sup>Not tested



**Fig S5:High resolution mass spectra**

**A:** MS (ESI): Calculated for  $C_{14}H_{17}NO_3$  ( $[M-H]^+$ ): 247.1281, found: 247.1237

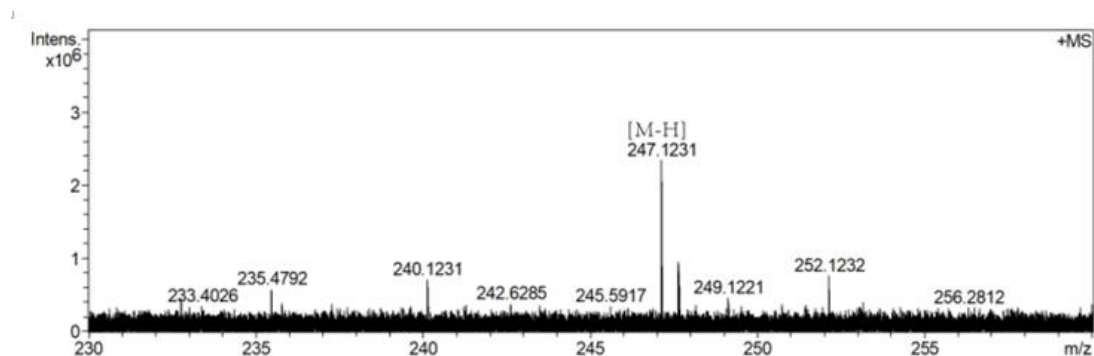

Fig.116 High resolution mass spectrum of intermediate A

The reducing product of intermediate **A** or **B** : MS (ESI): Calculated for  $C_{14}H_{19}NO_3Na$  ( $[M+Na]^+$ ): 272.1257, found: 272.1257

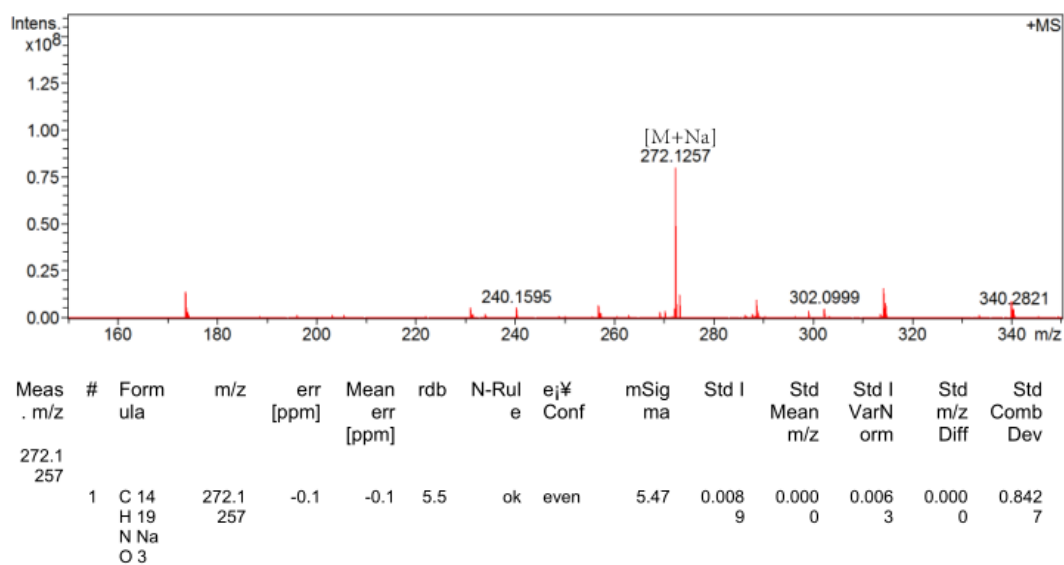

Fig.117 High resolution mass spectrum of the reducing product of intermediate **A** or **B**

**5a''** or **D**: MS (ESI): Calculated for  $C_{28}H_{35}N_2O_6$  ( $[M+H]^+$ ): 495.2490, found: 495.2490.

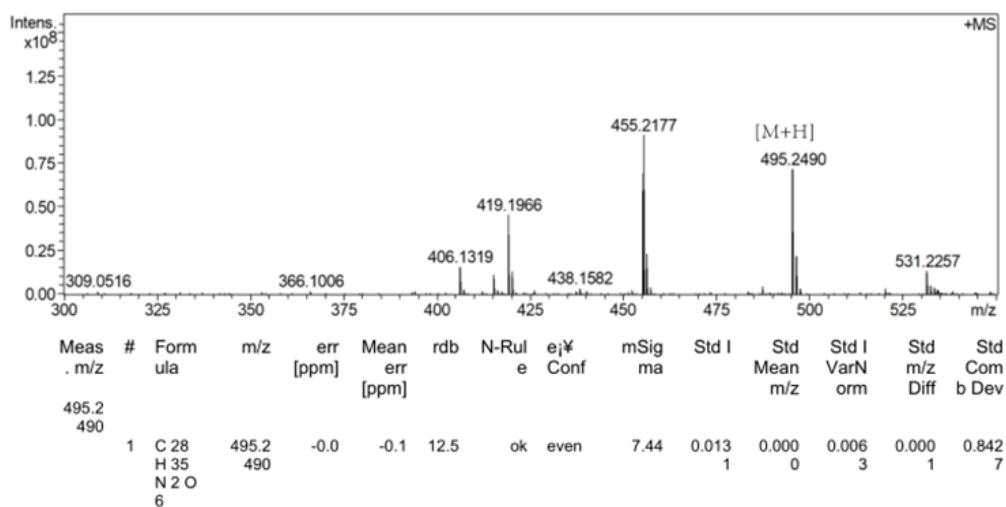

Fig.118 High resolution mass spectrum of compound **5a''** or intermediate **D**

**5a'**: MS (ESI): Calculated for  $C_{25}H_{31}N_2O_6$  ( $[M+H]^+$ ): 455.2177, found: 455.2177.

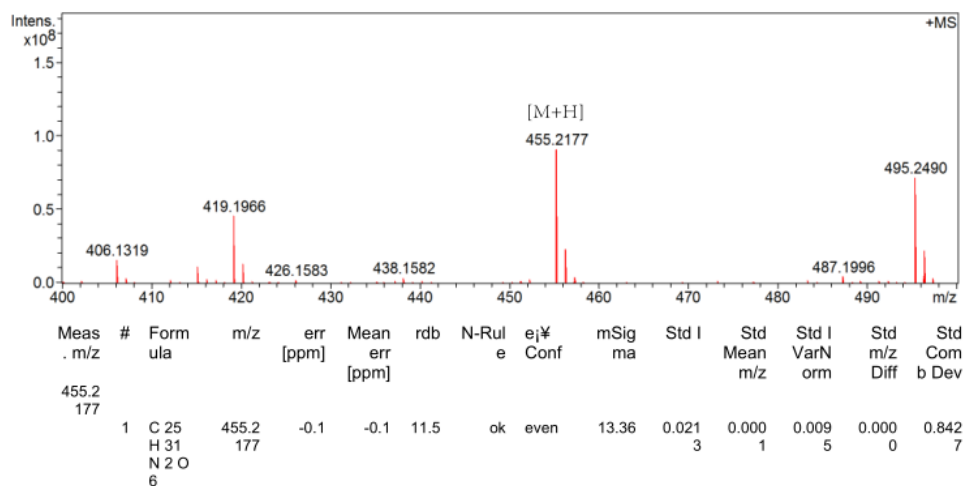

Fig.119 High resolution mass spectrum of compound **5a'**

**5a**:MS (ESI): Calculated for C<sub>22</sub>H<sub>27</sub>N<sub>2</sub>O<sub>6</sub> ([M+H]<sup>+</sup>): 415.1864, found: 415.1865.

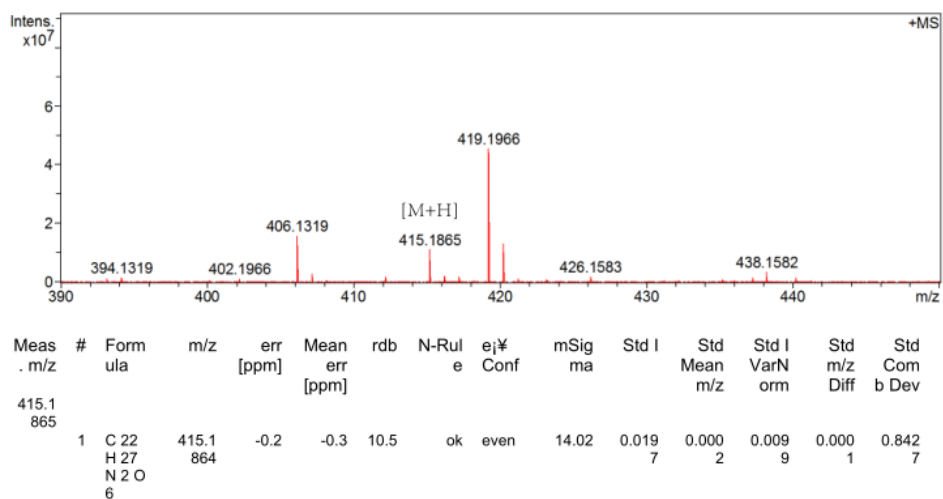

Fig.120 High resolution mass spectrum of compound **5a**

**Fig S6: Crystal Information**

To determine the absolute configuration of (3*R*,4*R*,4*aR*,4*bR*,5*S*,6*R*,7*R*,13*bS*)-12-bromo-1-(4-bromophenyl)-1,3,4,5,6,7,8,13*b*-octahydro-2*H*-benzo[*h*]pyrido[2,1-*f*][1,6]naphthyridine-3,4,4*a*,5,6,7(4*bH*)-hexaol (5q): Firstly, 5q was recrystallized from dichloromethane/ methanol. The solvents were slowly evaporated directly, and the single crystal was obtained after three days. The CCDC number is 2173338.

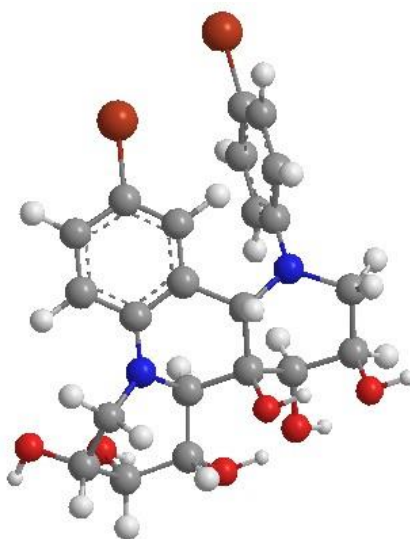

Fig.121 X-Ray Structure of of 5q

Bond precision: C-C = 0.0079 Å Wavelength=0.71073  
 Cell: a=12.4566(3) b=13.9128(4) c=29.9476(8)  
 alpha=90 beta=90 gamma=90  
 Temperature: 170 K

|                        | Calculated                               | Reported                                 |
|------------------------|------------------------------------------|------------------------------------------|
| Volume                 | 5190.1(2)                                | 5190.1(2)                                |
| Space group            | P 21 21 21                               | P 21 21 21                               |
| Hall group             | P 2ac 2ab                                | P 2ac 2ab                                |
| Moiety formula         | 2(C22 H24 Br2 N2 O6), C H Cl2, 3(C H4 O) | 2(C22 H24 Br2 N2 O6), 3(C H4 O), C H Cl2 |
| Sum formula            | C48 H61 Br4 Cl2 N4 O15                   | C48 H61 Br4 Cl2 N4 O15                   |
| Mr                     | 1324.51                                  | 1324.54                                  |
| Dx, g cm <sup>-3</sup> | 1.695                                    | 1.695                                    |
| Z                      | 4                                        | 4                                        |
| Mu (mm <sup>-1</sup> ) | 3.276                                    | 3.276                                    |
| F000                   | 2684.0                                   | 2684.0                                   |
| F000'                  | 2681.84                                  |                                          |
| h, k, lmax             | 15, 17, 37                               | 15, 17, 37                               |
| Nref                   | 10648 [ 5899]                            | 10031                                    |
| Tmin, Tmax             | 0.737, 0.849                             | 0.018, 0.045                             |
| Tmin'                  | 0.606                                    |                                          |

Correction method= # Reported T Limits: Tmin=0.018 Tmax=0.045  
 AbsCorr = MULTI-SCAN

Data completeness= 1.70/0.94 Theta(max)= 26.383

R(reflections)= 0.0373( 7589) WR2(reflections)=  
 0.0799( 10031)  
 S = 0.924 Npar= 706

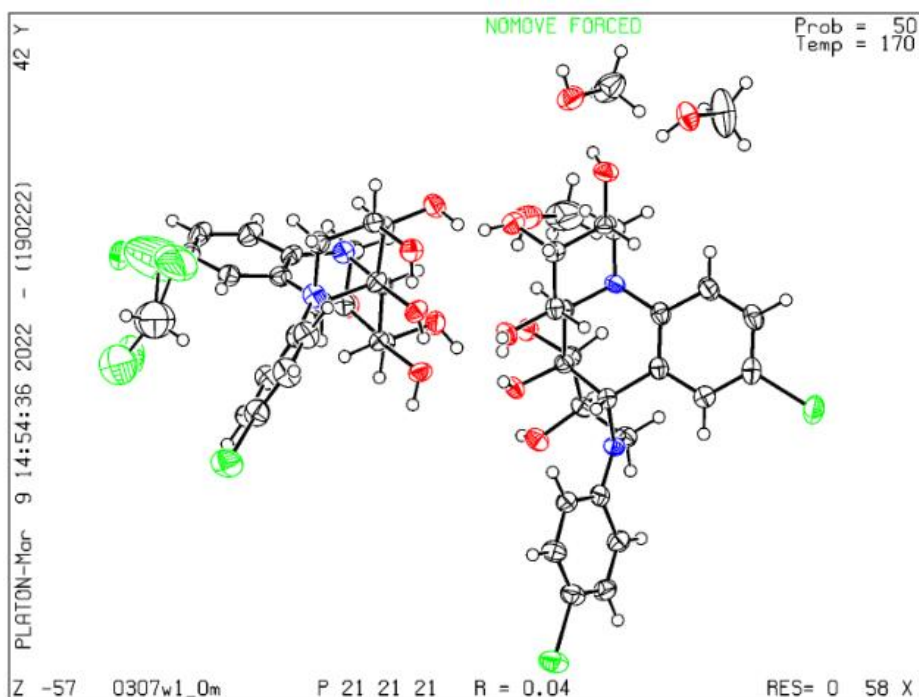

Supplement: d2qo01284g1.pdf [file d2qo01284g1.pdf]
